# Supplementary material for: Cardiovascular disease risk marker responses to breaking up prolonged sedentary time in individuals with paraplegia: the Spinal Cord Injury Move More (SCIMM) randomised crossover laboratory trial protocol
Source: PubMed Central journal article supplement — BMJ Open. 2018 Jun 22;8(6):e021936. doi: 10.1136/bmjopen-2018-021936 (PMC6020957; doi:10.1136/bmjopen-2018-021936), 2018-06-22
Supplement: bmjopen-2018-021936.draft_revisions.pdf [file bmjopen-2018-021936.draft_revisions.pdf]

# BMJ Open

BMJ Open is committed to open peer review. As part of this commitment we make the peer review history of every article we publish publicly available.

When an article is published we post the peer reviewers' comments and the authors' responses online. We also post the versions of the paper that were used during peer review. These are the versions that the peer review comments apply to.

The versions of the paper that follow are the versions that were submitted during the peer review process. They are not the versions of record or the final published versions. They should not be cited or distributed as the published version of this manuscript.

BMJ Open is an open access journal and the full, final, typeset and author-corrected version of record of the manuscript is available on our site with no access controls, subscription charges or pay-per-view fees (<http://bmjopen.bmj.com>).

If you have any questions on BMJ Open's open peer review process please email [info.bmjopen@bmj.com](mailto:info.bmjopen@bmj.com)

# BMJ Open

## Protocol for evaluating cardiovascular disease risk marker responses to breaking up prolonged sedentary time in individuals with paraplegia: the Spinal Cord Injury Move More (SCIMM) study

|                               |                                                                                                                                                                                                                                                                                                                                                                                                                                                                                                                                                                                                                                                                                                                                                                                                                                                                                                       |
|-------------------------------|-------------------------------------------------------------------------------------------------------------------------------------------------------------------------------------------------------------------------------------------------------------------------------------------------------------------------------------------------------------------------------------------------------------------------------------------------------------------------------------------------------------------------------------------------------------------------------------------------------------------------------------------------------------------------------------------------------------------------------------------------------------------------------------------------------------------------------------------------------------------------------------------------------|
| Journal:                      | <i>BMJ Open</i>                                                                                                                                                                                                                                                                                                                                                                                                                                                                                                                                                                                                                                                                                                                                                                                                                                                                                       |
| Manuscript ID                 | bmjopen-2018-021936                                                                                                                                                                                                                                                                                                                                                                                                                                                                                                                                                                                                                                                                                                                                                                                                                                                                                   |
| Article Type:                 | Protocol                                                                                                                                                                                                                                                                                                                                                                                                                                                                                                                                                                                                                                                                                                                                                                                                                                                                                              |
| Date Submitted by the Author: | 26-Jan-2018                                                                                                                                                                                                                                                                                                                                                                                                                                                                                                                                                                                                                                                                                                                                                                                                                                                                                           |
| Complete List of Authors:     | Withers, Thomas; University of Bedfordshire, Institute for Sport Science and Physical Activity Research, School of Sport Science and Physical Activity<br>Croft, Louise; University of Bedfordshire, Institute for Sport Science and Physical Activity Research, School of Sport Science and Physical Activity<br>Goosey-Tolfrey, Victoria L; Loughborough University, School of Sport, Exercise and Health Sciences, The Peter Harrison Centre for Disability Sport<br>Dunstan, David; Baker Heart and Diabetes Institute; Australian Catholic University, Mary MacKillop Institute for Health Research<br>Leicht, Christof; Loughborough University, School of Sport, Exercise and Health Sciences, The Peter Harrison Centre for Disability Sport<br>Bailey, Daniel; University of Bedfordshire, Institute for Sport and Physical Activity Research, School of Sport Science and Physical Activity |
| Keywords:                     | physical activity, sedentary lifestyle, activity breaks, glucose, cardiovascular disease, spinal cord injury                                                                                                                                                                                                                                                                                                                                                                                                                                                                                                                                                                                                                                                                                                                                                                                          |
|                               |                                                                                                                                                                                                                                                                                                                                                                                                                                                                                                                                                                                                                                                                                                                                                                                                                                                                                                       |

SCHOLARONE™  
Manuscripts

1  
2  
3 **Protocol for evaluating cardiovascular disease risk marker responses to breaking up**  
4 **prolonged sedentary time in individuals with paraplegia: the Spinal Cord Injury Move**  
5 **More (SCIMM) study**  
6  
7  
8  
9

10  
11 **Authors**

12 T. M. Withers, PhD: thomas.withers@beds.ac.uk, Institute for Sport Science and Physical  
13 Activity Research, School of Sport Science and Physical Activity, University of Bedfordshire,  
14 Polhill Avenue, Bedford, MK41 9EA, United Kingdom

15  
16 L. Croft, PhD: louise.croft@beds.ac.uk, Institute for Sport Science and Physical Activity  
17 Research, School of Sport Science and Physical Activity, University of Bedfordshire, Polhill  
18 Avenue, Bedford, MK41 9EA, United Kingdom.

19  
20 V. L. Goosey-Tolfrey, PhD: V.L.Tolfrey@lboro.ac.uk, School of Sport, Exercise and Health  
21 Sciences, The Peter Harrison Centre for Disability Sport, Loughborough University, Epinal  
22 Way, LE11 3TU, United Kingdom.

23  
24 D.W. Dunstan, PhD: david.dunstan@baker.edu.au, 1<sup>st</sup> affiliation: Baker Heart and Diabetes  
25 Institute, PO Box 6492, St Kilda Road Central, Victoria 8008, Melbourne, Victoria, Australia;  
26 2<sup>nd</sup> affiliation: Mary MacKillop Institute for Health Research, Australian Catholic University,  
27 Melbourne, Victoria, Australia 3000.

28  
29 C.A. Leicht, PhD: c.a.leicht@lboro.ac.uk, School of Sport, Exercise and Health Sciences,  
30 The Peter Harrison Centre for Disability Sport, Loughborough University, Epinal Way, LE11  
31 3TU, United Kingdom.

32  
33 D.P. Bailey, PhD: daniel.bailey@beds.ac.uk, Institute for Sport Science and Physical Activity  
34 Research, School of Sport Science and Physical Activity, University of Bedfordshire, Polhill  
35 Avenue, Bedford, MK41 9EA, United Kingdom.

36  
37  
38 **Corresponding author**

39  
40 D.P. Bailey, PhD: daniel.bailey@beds.ac.uk, Institute for Sport Science and Physical Activity  
41 Research, University of Bedfordshire, Polhill Avenue, Bedford, MK41 9EA

42  
43 **Word count:** 2676

44  
45 **Sources of funding:** This work is supported by Heart Research UK grant number  
46 RG2655/17/18.

47  
48 **Conflicts of interest:** None of the authors have declared any conflicts of interest.

49  
50 **Study start date:** 19<sup>th</sup> May 2017

51 **Study end date:** 18<sup>th</sup> January 2019

## 1 **Abstract**

2 **Introduction:** Sedentary behaviour is a distinct risk factor for cardiovascular disease (CVD)  
3 and could partly explain the increased prevalence of CVD in people with spinal cord injury  
4 (SCI). Interrupting prolonged sitting periods with regular short bouts of walking acutely  
5 suppresses postprandial glucose and lipids in able-bodied individuals. However, the acute  
6 CVD risk marker response to breaking up prolonged sedentary time in people with SCI has  
7 not been investigated. **Methods and analysis:** A randomised two-condition crossover trial  
8 will compare: 1) breaking up prolonged sedentary time with 2 min moderate-intensity arm  
9 crank activity every 20 min with 2) uninterrupted prolonged sedentary time (control) in people  
10 with SCI. Outcomes will include acute effects on postprandial glucose, insulin, lipids and  
11 blood pressure. Blood samples will be collected and blood pressure measured at regular  
12 intervals during each 5.5 h condition. **Ethics and dissemination:** This study was approved  
13 by the Cambridge South NHS Research Ethics Committee. The research will help determine  
14 if breaking up prolonged sedentary time could be effective in lowering CVD risk in people  
15 with SCI. The findings of the research will be published in a peer reviewed journal and  
16 disseminated to relevant user groups. **Trial registration:** The study is registered as a clinical  
17 trial on the ISRCTN register (trial ID: ISRCTN51868437).

## 19 **Strengths and limitations of this study**

- 20 • This is the first study to investigate cardiovascular disease risk marker responses to  
21 breaking up prolonged sedentary time in individuals with paraplegia.
- 22 • This study adds to the limited literature on the acute cardiovascular disease risk  
23 marker responses to intermittent physical activity in individuals with paraplegia.
- 24 • Due to the acute nature of the study, the long-term cardiovascular disease risk  
25 marker responses to a chronic intervention will remain unknown.
- 26 • The cardiovascular disease risk marker responses to breaking up prolonged  
27 sedentary time in people with tetraplegia still requires investigation.

1  
2  
3  
4  
5  
6  
7  
8  
9  
10  
11  
12  
13  
14  
15  
16  
17  
18  
19  
20  
21  
22  
23  
24  
25  
26  
27  
28  
29  
30  
31  
32  
33  
34  
35  
36  
37  
38  
39  
40  
41  
42  
43  
44  
45  
46  
47  
48  
49  
50  
51  
52  
53  
54  
55  
56  
57  
58  
59  
60

28 **Keywords:** physical activity; sedentary lifestyle; activity breaks; glucose; cardiovascular  
29 disease; spinal cord injury

For peer review only

## 30 Introduction

31 There is a global incident rate of 180,000 traumatic spinal cord injury (SCI) cases each year  
32 with a prevalence of over 40,000 in the UK [1, 2]. Cardiovascular disease (CVD) is a leading  
33 cause of death in individuals with SCI [3]. Traditional risk factors for CVD include impaired  
34 glucose tolerance, central obesity, high triglycerides, low high-density lipoprotein cholesterol  
35 (HDL), and high blood pressure. The clustering of  $\geq 2$  and  $\geq 3$  risk factors is prevalent in 87%  
36 and 72% of SCI individuals, respectively [4], which is markedly higher compared with the  
37 able-bodied population [5].

38  
39 Postprandial glucose and lipid concentrations are strong independent predictors of future  
40 CVD incidence, even in those without diabetes [6]. There is a dose-response relationship  
41 between postprandial glucose area under the curve (AUC) and CVD risk, while progression  
42 of carotid atherosclerosis can be prevented by control of postprandial glucose  
43 concentrations [7, 8]. It is thus pertinent to identify interventions to reduce postprandial  
44 glucose and lipid responses in individuals with SCI to reduce their CVD risk.

45  
46 Physical activity guidelines have been developed specifically for this population that  
47 recommend engaging in at least 30 min of moderate-to-vigorous physical activity (MVPA)  
48 three times per week for CVD health benefits [9]. Reduced levels of physical activity are  
49 proposed to largely account for the increased CVD risk in SCI [10]; it is estimated that 50%  
50 of this population engage in no leisure-time physical activity whatsoever [11]. However,  
51 sedentary behaviour (i.e. any waking behaviour in a sitting, reclining or lying posture with low  
52 energy expenditure [12]), is now recognised as being a significant CVD risk factor in the  
53 able-bodied population, independent of MVPA [13]. Experimental studies in able-bodied  
54 individuals have reported an acute reduction in postprandial glucose, insulin, triglycerides  
55 and blood pressure in response to breaking up prolonged sedentary time with 2 min bouts of  
56 light or moderate-intensity walking every 20 min [14-17]. No research has examined whether

1  
2  
3 57 postprandial CVD risk marker responses are attenuated in response to breaking up  
4  
5 58 prolonged sedentary time in individuals with SCI.  
6  
7 59  
8  
9 60 The primary aim of this study is therefore to compare the acute CVD risk marker responses  
10  
11 61 in individuals with SCI to 1) breaking up prolonged sedentary time, with 2) uninterrupted  
12  
13 62 sedentary time. It is hypothesised that breaking up prolonged sedentary time will result in  
14  
15 63 favourable CVD risk marker responses compared with uninterrupted sedentary time in  
16  
17 64 individuals with paraplegia.  
18

19 65

## 20 66 **Methods and analysis**

### 21 67 *Study design*

22  
23  
24 68 A randomised two-condition crossover design will be used in accordance with the SPIRIT  
25  
26 69 statement [18]. The study is registered as a clinical trial on the ISRCTN register (trial ID:  
27  
28 70 ISRCTN51868437). The study schedule can be seen in Table 1. All research will take place  
29  
30 71 at the University of Bedfordshire Sport and Exercise Science Laboratories. After preliminary  
31  
32 72 measures, participants will complete two experimental conditions in randomised order. The  
33  
34 73 conditions will be separated by  $\geq 6$  days to eliminate any potential carryover effects.  
35  
36 74 Condition order will be randomised by a researcher independent from the study using  
37  
38 75 computer generated random numbers (block randomisation with balanced block sizes).  
39

40 76

41  
42 77 Insert Table 1 about here.  
43

44 78

### 45 79 *Participants*

46  
47  
48 80 *Inclusion criteria:* Males and females aged 18-60 years; chronic SCI ( $\geq 1$  year since injury);  
49  
50 81 individuals with a traumatic SCI below Thoracic level 6 (mid to low level paraplegia);  
51  
52 82 individuals with a non-traumatic SCI (as defined within the International Spinal Cord Injury  
53  
54 83 Data Sets for non-traumatic SCI [19]) that present with mid to low level paraplegia.  
55

56 84 Individuals who express an interest in taking part in the study will be required to indicate their  
57  
58  
59

1  
2  
3  
4  
5  
6  
7  
8  
9  
10  
11  
12  
13  
14  
15  
16  
17  
18  
19  
20  
21  
22  
23  
24  
25  
26  
27  
28  
29  
30  
31  
32  
33  
34  
35  
36  
37  
38  
39  
40  
41  
42  
43  
44  
45  
46  
47  
48  
49  
50  
51  
52  
53  
54  
55  
56  
57  
58  
59  
60

85 spinal cord lesion level and completeness of injury via a questionnaire prior to preliminary  
86 measures. Participants will be encouraged to obtain relevant information from a medical  
87 professional if they are unaware of their injury level.

88

89 *Exclusion criteria:* individuals who regularly engage in >300 min/week of MVPA; history of  
90 severe cardiovascular complications; hypotension (resting blood pressure <90/60 mmHg);  
91 body mass index >45 kg/m<sup>2</sup>, a history of autonomic dysreflexia; pregnancy; taking glucose  
92 lowering medication; smokers; diagnosed diabetes, renal failure, liver disease, major illness,  
93 or other health issues that may limit ability to perform the physical activity protocols.

94

#### 95 *Recruitment*

96 Participants will be recruited through organisations and charities that promote physical  
97 activity, health and wellbeing for individuals with SCI; the National Spinal Injuries Centre,  
98 Stoke Mandeville Hospital, Buckinghamshire NHS Healthcare Trust; and local sport and  
99 activity clubs. Mail outs, social media, information on websites, posters, flyers, and visits  
100 from the research team will be used to provide information on the study to potentially eligible  
101 individuals who can then express their interest to the research team in taking part in the  
102 study. Written informed consent will be obtained by a member of the research team prior to  
103 participation in any testing protocols. As an incentive, participants will received a £25  
104 shopping gift voucher for each main condition they complete and will have all travel  
105 expenses paid.

106

#### 107 *Preliminary measures*

108 Participants will attend a preliminary testing session where they will have body mass  
109 measured using wheelchair double beam scales (300 series; Marsden, London, UK) and  
110 body fat% measured using dual-energy x-ray absorptiometry (DXA; GE Medical Systems;  
111 Chalfont St Giles, UK) in line with previous research [20]. During DXA measures,



1  
2  
3 112 participants will be positioned as closely as possible to standard protocols and Velcro  
4  
5 113 restraints will be fastened around the participant's knees and ankles to maintain correct  
6  
7 114 position of the legs during scanning. Participants will be offered a wedge to be used as a  
8  
9 115 pillow for comfort. Waist circumference will be measured using International Standards for  
10  
11 116 Anthropometric Assessment (ISAK) guidelines [21, 22]. These measures will be taken in the  
12  
13 117 standing position for participants who are able to maintain this posture and in a supine  
14  
15 118 position for participants who are not able to stand [23]. Resting blood pressure will be  
16  
17 119 measured on the left arm, while seated, three times after the participant has rested for 5 min  
18  
19 120 with the lowest readings being recorded. Following this, participants will be familiarised with  
20  
21 121 use of the Borg 6-20 Rating of Perceived Exertion (RPE) scale [24]. They will then cycle  
22  
23 122 using an arm ergometer (Lode Angio; Lode, Netherlands) to determine the intensity (power  
24  
25 123 output) that yields an RPE of 13 (somewhat hard) in line with previous sedentary behaviour  
26  
27 124 research [14, 25]. Participants will be asked to cycle at ~70 rpm during the test. The test will  
28  
29 125 start at a low intensity (~20 Watts), which will gradually increase until an RPE of 13 has been  
30  
31 126 attained. The test is expected to take no longer than 15 min. The intensity that corresponds  
32  
33 127 to an RPE of 13 during the test will be recorded for each participant and used for the  
34  
35 128 physical activity breaks described in the respective main condition below. The use of the  
36  
37 129 Borg 6-20 RPE scale is highly reproducible in individuals with SCI to determine physical  
38  
39 130 activity intensity [26].

40  
41 131

### 42 132 *Experimental protocol*

43  
44 133 **Error! Reference source not found.** shows the experimental protocol. Participants will be  
45  
46 134 instructed to refrain from caffeine, alcohol and exercise for 48 h prior to each experimental  
47  
48 135 condition. They will also be provided with a food diary and digital weighing scales to record  
49  
50 136 volume and timings of all food and liquids consumed in the 24 h period prior to the first  
51  
52 137 experimental condition. Participants will be asked to replicate their diet the day prior to the  
53  
54 138 subsequent experimental condition [27]. On condition days, participants will attend in the  
55  
56 139 morning following an overnight fast and avoid active travel to the laboratory. Upon arrival,

1  
2  
3 140 resting blood pressure will be measured after 5 min rest; two measures will be taken and the  
4  
5 141 lowest of these recorded. A fasting capillary blood sample will then be collected. Participants  
6  
7 142 will commence the 5.5 h condition period following consumption of a standardised breakfast.  
8  
9 143 The two experimental conditions are as follows:

10  
11 144

12  
13 145 1. *Uninterrupted sedentary time (SED)*: participants will remain seated and inactive in their  
14  
15 146 wheelchair or a standard chair at a desk during this condition.

16  
17 147 2. *Sedentary time interrupted with physical activity breaks (SED-ACT)*: participants will  
18  
19 148 complete 2 min of moderate-intensity arm crank activity every 20 min at ~70 rpm using  
20  
21 149 the Lode Angio arm ergometer. These 15 breaks will equate to a total of 30 min physical  
22  
23 150 activity.

24  
25 151

26  
27 152 Figure 1 about here.

28  
29 153

30  
31 154 An RPE of 13 for the physical activity intensity was selected in line with previous research  
32  
33 155 [14, 28] and the Borg 6-20 RPE scale may be used to assess and regulate upper-body  
34  
35 156 physical activity at moderate-to-vigorous intensity in adults with chronic SCI [26]. Moderate-  
36  
37 157 intensity physical activity was selected as it is well-tolerated, can be performed safely, and is  
38  
39 158 recommended for health risk reduction in individuals with SCI [9, 29].

40  
41 159

42  
43 160 Participants will be permitted to work on a laptop computer, read, talk, or watch DVDs during  
44  
45 161 each condition. Except during the activity bouts, participants will remain inactive and only  
46  
47 162 leave their desk to void and consume standardised meals in a kitchen adjacent to the test  
48  
49 163 laboratory; participants will be aided by a member of the research team when moving to  
50  
51 164 these locations so that they remain inactive. A researcher will be present to ensure  
52  
53 165 compliance with protocols throughout all conditions.

54  
55 166

56  
57 167 *Meal and water consumption*

1  
2  
3 168 Standardised meals will be consumed immediately prior to the start of each experimental  
4  
5 169 condition and at 3 h, each providing 30% of estimated daily energy requirements for each  
6  
7 170 participant [30]. Participants will be asked to consume each meal within a 15 min time  
8  
9 171 period. The time taken to consume the meals will be recorded for the first condition and  
10  
11 172 participants will be asked to replicate this time as closely as possible in the subsequent  
12  
13 173 condition. Breakfast will consist of bran flakes, whole milk, croissant, butter and orange juice  
14  
15 174 (55% carbohydrate, 34% fat, 12% protein) and lunch will be a chicken sandwich, salted  
16  
17 175 crisps and apple (54% carbohydrate, 34% fat, 13% protein). This macronutrient composition  
18  
19 176 of meals was chosen as it is generally representative of UK guidelines for a balanced diet  
20  
21 177 [31]. The glycaemic index for these breakfast and lunch meals is 43 and 72, respectively.  
22  
23 178 Glycaemic index values for each food item were obtained from the International Tables of  
24  
25 179 Glycaemic Index and Glycaemic Load Values 2008 [32] and meal glycaemic index was  
26  
27 180 calculated using weighted means of the glycaemic index values for the component foods  
28  
29 181 [33]. Water will be available ad libitum during the first condition and this volume of intake will  
30  
31 182 be provided at standardised regular intervals in the subsequent condition.

32  
33 183

#### 34 184 *Blood collection and biochemistry*

35  
36 185 Finger prick blood samples will be collected into two EDTA-containing microvettes  
37  
38 186 (Microvette CB300 EDTA, Sarstedt Ltd, Leicester, UK) at baseline and at 30, 60, 90, 120,  
39  
40 187 180, 210, 240, 300 and 330 min. Blood samples will be collected before the hourly activity  
41  
42 188 bouts in SED-ACT. At each time point, approximately 600  $\mu$ L of whole blood will be  
43  
44 189 collected. Blood glucose concentrations will be analysed immediately using the YSI 2300  
45  
46 190 STAT plus glucose and lactate analyzer (YSI Inc., Yellow Springs, OH, USA) from 30  $\mu$ L of  
47  
48 191 blood from one microvette. Additional 30  $\mu$ L volumes of whole blood will be aliquoted onto  
49  
50 192 two separate Reflotron test strips (Roche Diagnostics, Burgess Hill, UK) for the  
51  
52 193 measurement of triglyceride and HDL concentrations using the Reflotron Plus system  
53  
54 194 (Roche Diagnostics, Burgess Hill, UK). The remaining whole blood ( $\sim$ 490  $\mu$ L) will be

1  
2  
3 195 centrifuged at 2500 x g for 5 min (Heraeus Pico 17, Thermo Scientific, Loughborough, UK)  
4  
5 196 and the plasma then stored at -80°C. An enzyme-linked immunosorbent assay kit will be  
6  
7 197 used to determine plasma concentrations of insulin (Mercodia, Uppsala, Sweden).  
8  
9 198

### 10 199 *Blood pressure*

12 200 Blood pressure will be measured at baseline as described above followed by single readings  
13  
14 201 taken at 60, 120, 180, 240, 300, and 330 min. Readings will be taken 5 min before the hourly  
15  
16 202 activity bouts in SED-ACT. Blood pressure will be measured using an automated oscillatory  
17  
18 203 blood pressure monitor (Omron M5-I; Omron Matsusaka Co. Ltd., Matsusaka, Japan).  
19  
20 204

### 22 205 *Study outcomes*

24 206 *Primary outcome:* the primary outcome for the study is within-participant, between condition  
25  
26 207 postprandial glucose net incremental area under the curve (iAUC) [6]. *Secondary outcomes:*  
27  
28 208 these include within-participant, between condition mean systolic and diastolic blood  
29  
30 209 pressure, and net iAUC for postprandial triglycerides, HDL and insulin. Positive iAUC and  
31  
32 210 total AUC will also be calculated for postprandial triglycerides, HDL and insulin to permit  
33  
34 211 comparisons across previous studies. *Feasibility measures:* to assess feasibility of the trial,  
35  
36 212 participant dropout, number of experimental sessions completed, fatigue at the beginning  
37  
38 213 and end of each day rated on an 11 point (0-10) Visual Analogue Scale (VAS), and the  
39  
40 214 degree of difficulty in completing the experimental conditions rated on an 11 point (0-10)  
41  
42 215 VAS will be recorded. Participants will also complete the Physical Activity Enjoyment Scale  
43  
44 216 [34] at the end of the SED-ACT condition and report their enjoyment on a 200 mm VAS [35]  
45  
46 217 (“Enjoyment”) 20 min after the last activity bout in the SED-ACT condition. Participants will  
47  
48 218 also report on the same scale how enjoyable they would find it to engage in this form of  
49  
50 219 physical activity most days of the week in the coming month (“Expected enjoyment”).  
51  
52 220 *Psychological outcomes:* determinants of sedentary behaviour will be measured based on  
53  
54 221 the COM-B [36] and the theory of planned behaviour using standardised wording formats  
55  
56 222 [37] that will include overcoming barriers (self-efficacy/perceived behavioural control),  
57  
58  
59  
60

1  
2  
3 223 attitudes, intentions and action planning. The following questionnaires will be completed by  
4  
5 224 participants at baseline and at the end of each experimental condition: sedentary behaviour  
6  
7 225 self-efficacy using an adapted version of the Schwarzer et al. [38] Physical Exercise Self-  
8  
9 226 Efficacy Scale; current mood using the short Positive and Negative Affect Scale [39];  
10  
11 227 psychological wellbeing using the National Wellbeing Measurement [40]; and the Warwick  
12  
13 228 Edinburgh Mental Well-Being Scale [41].

14  
15 229

### 16 230 *Sample size calculations*

17  
18 231 Sample size calculations were performed using GPower [42]. Previous research reported a  
19  
20 232 16% reduction (effect size,  $F=0.61$ ) in 5 h postprandial glucose total AUC when breaking up  
21  
22 233 prolonged sedentary time with 2 min light-intensity walking every 20 min versus  
23  
24 234 uninterrupted sitting in able-bodied participants [16]. As this study will use arm cranking  
25  
26 235 (localised muscular contractions) as opposed to walking where a larger muscle mass is  
27  
28 236 required, a smaller effect may be observed. Based on this, it was estimated that 14  
29  
30 237 participants would be required for this complete two-treatment crossover design to detect a  
31  
32 238 smaller minimum intervention effect of 10% with a within-person correlation of 0.6, 80%  
33  
34 239 power, and an  $\alpha$  of 0.05. To allow for potential withdrawals, a total of 20 participants will be  
35  
36 240 recruited.

37  
38 241

### 39 242 *Statistical analysis*

40  
41  
42 243 Linear mixed models will be used to determine differences in the primary and secondary  
43  
44 244 outcome variables between the conditions. All models will adjust for potential covariates  
45  
46 245 explaining residual outcome variances. Statistical significance will be accepted as  $p<0.05$ .  
47  
48 246 Cohens' d effect sizes will be calculated to describe the magnitude of differences between  
49  
50 247 conditions [43].

51  
52 248  
53  
54  
55  
56  
57  
58  
59  
60

1  
2  
3 249 **Ethics and dissemination**

4 250 This study was approved on the 19<sup>th</sup> May 2017 by the Cambridge South NHS Research  
5  
6 251 Ethics Committee (reference 17/EE/0076).  
7  
8

9 252

10 253 The findings of this research will be disseminated to lay, academic, practice, and policy-  
11  
12 254 based audiences via presentation at conference proceedings; publication in a peer review  
13  
14 255 journal; websites, newsletters, and social media; and summary reports to policy makers and  
15  
16 256 clinical care partners.  
17

18 257

19  
20 258 **Acknowledgements:** The authors would like to thank Dr Jan van der Scheer for providing  
21  
22 259 his advice on the design of the study protocol.  
23

24 260

25  
26 261 **Author contributions**

27 262 DB and LC conceptualised the study.

28  
29 263 TW, LC, VT, DD, CL, and DB contributed to the design of the study protocol.

30  
31 264 TW drafted the manuscript.

32  
33 265 TW, LC, VT, DD, CL, and DB commented and edited each section of the manuscript and  
34  
35 266 approved the final version.  
36  
37

38 267

39  
40 268 **Funding statement**

41 269 This work is supported by Heart Research UK grant number RG2655/17/18.

42  
43 270

44  
45 271 **Conflicts of interest**

46 272 None of the authors have declared any conflicts of interest.

47  
48 273

49  
50 274  
51  
52  
53  
54  
55  
56  
57  
58  
59  
60

275 **References**

- 276 1. Lee, BB, Cripps, RA, Fitzharris, M, et al. The global map for traumatic spinal cord  
277 injury epidemiology: update 2011, global incidence rate. *Spinal Cord*, 2014. 52(2):  
278 110-6.
- 279 2. British Society of Rehabilitation Medicine. Chronic spinal cord injury: management of  
280 patients in acute hospital settings: National Guidelines. Available at  
281 <http://www.bsrm.org.uk/downloads/sciwebversion.pdf> (accessed 26 April 2016).  
282 2008.
- 283 3. Garshick, E, Kelley, A, Cohen, SA, et al. A prospective assessment of mortality in  
284 chronic spinal cord injury. *Spinal Cord*, 2005. 43(7): 408-16.
- 285 4. Wahman, K, Nash, MS, Westgren, N, et al. Cardiovascular disease risk factors in  
286 persons with paraplegia: the Stockholm spinal cord injury study. *J Rehabil Med*,  
287 2010. 42(3): 272-8.
- 288 5. Ford, ES, Giles, WH, and Dietz, WH. Prevalence of the metabolic syndrome among  
289 US adults: findings from the third National Health and Nutrition Examination Survey.  
290 *Jama*, 2002. 287(3): 356-359.
- 291 6. O'Keefe, JH and Bell, DS. Postprandial hyperglycemia/hyperlipidemia (postprandial  
292 dysmetabolism) is a cardiovascular risk factor. *Am J Cardiol*, 2007. 100(5): 899-904.
- 293 7. Esposito, K, Giugliano, D, Nappo, F, et al. Regression of carotid atherosclerosis by  
294 control of postprandial hyperglycemia in type 2 diabetes mellitus. *Circulation*, 2004.  
295 110(2): 214-9.
- 296 8. Smith, NL, Barzilay, JI, Shaffer, D, et al. Fasting and 2-hour postchallenge serum  
297 glucose measures and risk of incident cardiovascular events in the elderly: the  
298 Cardiovascular Health Study. *Archives of internal medicine*, 2002. 162(2): 209-216.
- 299 9. Martin Ginis, KA, van der Scheer, JW, Latimer-Cheung, AE, et al. Evidence-based  
300 scientific exercise guidelines for adults with spinal cord injury: an update and a new  
301 guideline. 2017.
- 302 10. Ginis, KA, Hicks, AL, Latimer, AE, et al. The development of evidence-informed  
303 physical activity guidelines for adults with spinal cord injury. *Spinal Cord*, 2011.  
304 49(11): 1088-96.
- 305 11. Ginis, KA, Arbour-Nicitopoulos, KP, Latimer, AE, et al. Leisure time physical activity  
306 in a population-based sample of people with spinal cord injury part II: activity types,  
307 intensities, and durations. *Arch Phys Med Rehabil*, 2010. 91(5): 729-33.
- 308 12. Tremblay, MS, Aubert, S, Barnes, JD, et al. Sedentary Behavior Research Network  
309 (SBRN) - Terminology Consensus Project process and outcome. *Int J Behav Nutr*  
310 *Phys Act*, 2017. 14(1): 75.



- 1  
2  
3 311 13. Dunstan, DW, Thorp, AA, and Healy, GN. Prolonged sitting: is it a distinct coronary  
4 312 heart disease risk factor? *Curr Opin Cardiol*, 2011. 26(5): 412-9.  
5  
6 313 14. Dunstan, DW, Kingwell, BA, Larsen, R, et al. Breaking up prolonged sitting reduces  
7 314 postprandial glucose and insulin responses. *Diabetes Care*, 2012. 35(5): 976-83.  
8  
9 315 15. Miyashita, M, Edamoto, K, Kidokoro, T, et al. Interrupting Sitting Time with Regular  
10 316 Walks Attenuates Postprandial Triglycerides. *Int J Sports Med*, 2016. 37(2): 97-103.  
11  
12 317 16. Bailey, DP and Locke, CD. Breaking up prolonged sitting with light-intensity walking  
13 318 improves postprandial glycemia, but breaking up sitting with standing does not. *J Sci*  
14 319 *Med Sport*, 2015. 18(3): 294-8.  
15  
16 320 17. Larsen, RN, Kingwell, BA, Sethi, P, et al. Breaking up prolonged sitting reduces  
17 321 resting blood pressure in overweight/obese adults. *Nutr Metab Cardiovasc Dis*, 2014.  
18 322 24(9): 976-82.  
19  
20 323 18. Chan, A-W, Tetzlaff, JM, Altman, DG, et al. SPIRIT 2013 statement: defining  
21 324 standard protocol items for clinical trials. *Annals of internal medicine*, 2013. 158(3):  
22 325 200-207.  
23  
24 326 19. New, PW and Marshall, R. International Spinal Cord Injury Data Sets for non-  
25 327 traumatic spinal cord injury. *Spinal Cord*, 2014. 52(2): 123-32.  
26  
27 328 20. Keil, M, Totosy de Zepetnek, JO, Brooke-Wavell, K, et al. Measurement precision of  
28 329 body composition variables in elite wheelchair athletes, using dual-energy X-ray  
29 330 absorptiometry. *European journal of sport science*, 2016. 16(1): 65-71.  
30  
31 331 21. Marfell-Jones, MJ, Stewart, AD, and De Ridder, JH. International standards for  
32 332 anthropometric assessment. 2012.  
33  
34 333 22. Willems, A, Paulson, TA, Keil, M, et al. Dual-Energy X-Ray Absorptiometry, Skinfold  
35 334 Thickness, and Waist Circumference for Assessing Body Composition in Ambulant  
36 335 and Non-Ambulant Wheelchair Games Players. *Front Physiol*, 2015. 6: 356.  
37  
38 336 23. Willems, A, Paulson, TAW, Keil, M, et al. Dual-energy X-ray absorptiometry, skinfold  
39 337 thickness, and waist circumference for assessing body composition in ambulant and  
40 338 non-ambulant wheelchair games players. *Frontiers in physiology*, 2015. 6.  
41  
42 339 24. Borg, GA. Psychophysical bases of perceived exertion. *Med Sci Sports Exerc*, 1982.  
43 340 14(5): 377-81.  
44  
45 341 25. Bailey, DP, Maylor, BD, Orton, CJ, et al. Effects of breaking up prolonged sitting  
46 342 following low and high glycaemic index breakfast consumption on glucose and insulin  
47 343 concentrations. *Eur J Appl Physiol*, 2017.  
48  
49 344 26. van der Scheer, JW, Hutchinson, M, Paulson, T, et al. Reliability and validity of  
50 345 subjective measures of aerobic intensity in adults with spinal cord injury: a systematic  
51 346 review. *PM&R*, 2017.  
52  
53  
54  
55  
56  
57  
58  
59  
60



- 1  
2  
3 347 27. Bailey, DP, Broom, DR, Christmas, BC, et al. Breaking up prolonged sitting time with  
4 348 walking does not affect appetite or gut hormone concentrations but does induce an  
5 349 energy deficit and suppresses postprandial glycaemia in sedentary adults. *Appl*  
6 350 *Physiol Nutr Metab*, 2016. 41: 1-8.
- 7  
8 351 28. Bailey, DP, Broom, DR, Christmas, BC, et al. Breaking up prolonged sitting time with  
9 352 walking does not affect appetite or gut hormone concentrations but does induce an  
10 353 energy deficit and suppresses postprandial glycaemia in sedentary adults. *Appl*  
11 354 *Physiol Nutr Metab*, 2016. 41(3): 324-31.
- 12  
13 355 29. Burr, JF, Shephard, RJ, and Zehr, EP. Physical activity after stroke and spinal cord  
14 356 injury: evidence-based recommendations on clearance for physical activity and  
15 357 exercise. *Can Fam Physician*, 2012. 58(11): 1236-9.
- 16  
17 358 30. Schofield, WN. Predicting basal metabolic rate, new standards and review of  
18 359 previous work. *Hum Nutr Clin Nutr*, 1985. 39 Suppl 1: 5-41.
- 19  
20 360 31. Food Standards Agency. FSA nutrient and food based guidelines for UK institutions.  
21 361 Available at:  
22 362 <http://www.food.gov.uk/sites/default/files/multimedia/pdfs/nutrientinstitution.pdf>  
23 363 (accessed 18 Jan 2016). 2007.
- 24  
25 364 32. Atkinson, FS, Foster-Powell, K, and Brand-Miller, JC. International tables of glycemic  
26 365 index and glycemic load values: 2008. *Diabetes Care*, 2008. 31(12): 2281-3.
- 27  
28 366 33. Wolever, TM and Jenkins, DJ. The use of the glycemic index in predicting the blood  
29 367 glucose response to mixed meals. *Am J Clin Nutr*, 1986. 43(1): 167-72.
- 30  
31 368 34. Kendzierski, D and DeCarlo, K. Physical activity enjoyment scale: two validation  
32 369 studies. *J Sport Ex Psych*, 1991. 13: 50-64.
- 33  
34 370 35. Svensson, E. Comparison of the Quality of Assessments Using Continuous and  
35 371 Discrete Ordinal Rating Scales. *Biom J*, 2000. 42(4): 417-434.
- 36  
37 372 36. Michie, S, Ashford, S, Sniehotta, FF, et al. A refined taxonomy of behaviour change  
38 373 techniques to help people change their physical activity and healthy eating  
39 374 behaviours: the CALO-RE taxonomy. *Psychol Health*, 2011. 26(11): 1479-98.
- 40  
41 375 37. Francis, J, Eccles, MP, Johnston, M, et al. Constructing questionnaires based on the  
42 376 theory of planned behaviour: A manual for health services researchers. Newcastle  
43 377 upon Tyne, UK: Centre for Health Services Research, University of Newcastle upon  
44 378 Tyne. 2004.
- 45  
46 379 38. Schwarzer, R and Renner, B. Social-cognitive predictors of health behavior: action  
47 380 self-efficacy and coping self-efficacy. *Health Psychol*, 2000. 19(5): 487-95.
- 48  
49 381 39. Thompson, ER. Development and Validation of an Internationally Reliable Short-  
50 382 Form of the Positive and Negative Affect Schedule (PANAS). *Journal of Cross-  
51 383 Cultural Psychology*, 2007. 38(2): 227-242.

- 1  
2  
3 384 40. Tinkler, L. Measuring National Well-being: Personal Well-being in the UK, 2014 to  
4 385 2015. 2015; Available from:  
5 386 <https://www.ons.gov.uk/peoplepopulationandcommunity/wellbeing/bulletins/measuring-national-well-being/2015-09-23>.  
6 387  
7 388 41. Tennant, R, Hillier, L, Fishwick, R, et al. The Warwick-Edinburgh Mental Well-being  
8 389 Scale (WEMWBS): development and UK validation. Health and Quality of Life  
9 390 Outcomes, 2007. 5(1): 63.  
10 391 42. Faul, F, Erdfelder, E, Lang, AG, et al. G\*Power 3: a flexible statistical power analysis  
11 392 program for the social, behavioral, and biomedical sciences. Behav Res Methods,  
12 393 2007. 39(2): 175-91.  
13 394 43. Cohen, J. Statistical power analysis for the behavioral sciences. 2nd ed. 1988,  
14 395 Hillsdale, NJ: Erlbaum.  
15 396

1  
2  
3  
4  
5  
6  
7  
8  
9  
10  
11  
12  
13  
14  
15  
16  
17  
18  
19  
20  
21  
22  
23  
24  
25  
26  
27  
28  
29  
30  
31  
32  
33  
34  
35  
36  
37  
38  
39  
40  
41  
42  
43  
44  
45  
46  
47

**Table 1.** Study schedule

| <b>Visit</b>    | Over phone/<br>email     | 1                                                                               |                | 2                                |                | 3                                |
|-----------------|--------------------------|---------------------------------------------------------------------------------|----------------|----------------------------------|----------------|----------------------------------|
| <b>Activity</b> | Eligibility<br>screening | Preliminary visit<br>and<br>randomisation to<br>experimental<br>condition order | ≥6 day washout | Experimental<br>condition A or B | ≥6 day washout | Experimental<br>condition A or B |

For peer review only

1  
2  
3 **Figure captions**  
4

5 **Figure 1** Schematic of experimental protocol.  
6  
7  
8  
9  
10  
11  
12  
13  
14  
15  
16  
17  
18  
19  
20  
21  
22  
23  
24  
25  
26  
27  
28  
29  
30  
31  
32  
33  
34  
35  
36  
37  
38  
39  
40  
41  
42  
43  
44  
45  
46  
47  
48  
49  
50  
51  
52  
53  
54  
55  
56  
57  
58  
59  
60

For peer review only

1  
2  
3  
4  
5  
6  
7  
8  
9  
10  
11  
12  
13  
14  
15  
16  
17  
18  
19  
20  
21  
22  
23  
24  
25  
26  
27  
28  
29  
30  
31  
32  
33  
34  
35  
36  
37  
38  
39  
40  
41  
42  
43  
44  
45  
46  
47  
48  
49  
50  
51  
52  
53  
54  
55  
56  
57  
58  
59  
60

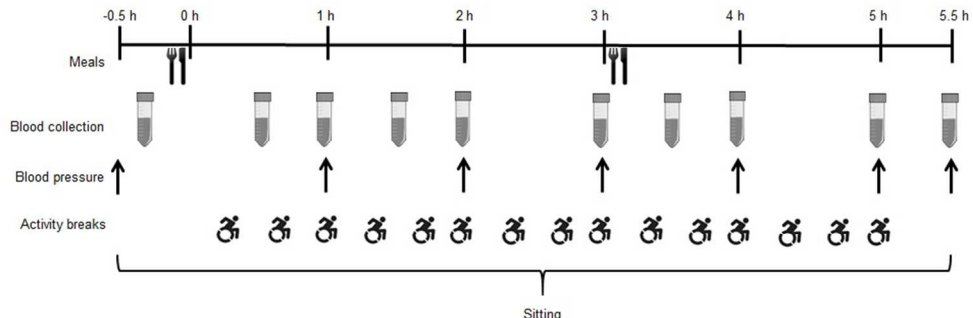

Figure 1

259x96mm (96 x 96 DPI)

Peer review only

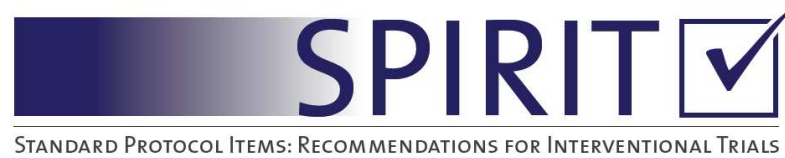

SPIRIT 2013 Checklist: Recommended items to address in a clinical trial protocol and related documents\*

| Section/item                      | Item No | Description                                                                                                                                                                                                                                                                              | Addressed on page number |
|-----------------------------------|---------|------------------------------------------------------------------------------------------------------------------------------------------------------------------------------------------------------------------------------------------------------------------------------------------|--------------------------|
| <b>Administrative information</b> |         |                                                                                                                                                                                                                                                                                          |                          |
| Title                             | 1       | Descriptive title identifying the study design, population, interventions, and, if applicable, trial acronym                                                                                                                                                                             | ___1___                  |
| Trial registration                | 2a      | Trial identifier and registry name. If not yet registered, name of intended registry                                                                                                                                                                                                     | ___2___                  |
|                                   | 2b      | All items from the World Health Organization Trial Registration Data Set                                                                                                                                                                                                                 | ___2___                  |
| Protocol version                  | 3       | Date and version identifier                                                                                                                                                                                                                                                              | ___NA___                 |
| Funding                           | 4       | Sources and types of financial, material, and other support                                                                                                                                                                                                                              | ___1___                  |
| Roles and responsibilities        | 5a      | Names, affiliations, and roles of protocol contributors                                                                                                                                                                                                                                  | ___12___                 |
|                                   | 5b      | Name and contact information for the trial sponsor                                                                                                                                                                                                                                       | ___NA___                 |
|                                   | 5c      | Role of study sponsor and funders, if any, in study design; collection, management, analysis, and interpretation of data; writing of the report; and the decision to submit the report for publication, including whether they will have ultimate authority over any of these activities | ___12___                 |
|                                   | 5d      | Composition, roles, and responsibilities of the coordinating centre, steering committee, endpoint adjudication committee, data management team, and other individuals or groups overseeing the trial, if applicable (see Item 21a for data monitoring committee)                         | ___NA___                 |

1  
2  
3  
4  
5  
6  
7  
8  
9  
10  
11  
12  
13  
14  
15  
16  
17  
18  
19  
20  
21  
22  
23  
24  
25  
26  
27  
28  
29  
30  
31  
32  
33  
34  
35  
36  
37  
38  
39  
40  
41  
42  
43  
44  
45  
46  
47

**Introduction**

|                          |    |                                                                                                                                                                                                           |     |
|--------------------------|----|-----------------------------------------------------------------------------------------------------------------------------------------------------------------------------------------------------------|-----|
| Background and rationale | 6a | Description of research question and justification for undertaking the trial, including summary of relevant studies (published and unpublished) examining benefits and harms for each intervention        | 4-5 |
|                          | 6b | Explanation for choice of comparators                                                                                                                                                                     | NA  |
| Objectives               | 7  | Specific objectives or hypotheses                                                                                                                                                                         | 5   |
| Trial design             | 8  | Description of trial design including type of trial (eg, parallel group, crossover, factorial, single group), allocation ratio, and framework (eg, superiority, equivalence, noninferiority, exploratory) | 5   |

**Methods: Participants, interventions, and outcomes**

|                      |     |                                                                                                                                                                                                                                                                                                                                                                                |     |
|----------------------|-----|--------------------------------------------------------------------------------------------------------------------------------------------------------------------------------------------------------------------------------------------------------------------------------------------------------------------------------------------------------------------------------|-----|
| Study setting        | 9   | Description of study settings (eg, community clinic, academic hospital) and list of countries where data will be collected. Reference to where list of study sites can be obtained                                                                                                                                                                                             | 5   |
| Eligibility criteria | 10  | Inclusion and exclusion criteria for participants. If applicable, eligibility criteria for study centres and individuals who will perform the interventions (eg, surgeons, psychotherapists)                                                                                                                                                                                   | 5   |
| Interventions        | 11a | Interventions for each group with sufficient detail to allow replication, including how and when they will be administered                                                                                                                                                                                                                                                     | NA  |
|                      | 11b | Criteria for discontinuing or modifying allocated interventions for a given trial participant (eg, drug dose change in response to harms, participant request, or improving/worsening disease)                                                                                                                                                                                 | NA  |
|                      | 11c | Strategies to improve adherence to intervention protocols, and any procedures for monitoring adherence (eg, drug tablet return, laboratory tests)                                                                                                                                                                                                                              | NA  |
|                      | 11d | Relevant concomitant care and interventions that are permitted or prohibited during the trial                                                                                                                                                                                                                                                                                  | NA  |
| Outcomes             | 12  | Primary, secondary, and other outcomes, including the specific measurement variable (eg, systolic blood pressure), analysis metric (eg, change from baseline, final value, time to event), method of aggregation (eg, median, proportion), and time point for each outcome. Explanation of the clinical relevance of chosen efficacy and harm outcomes is strongly recommended | 10  |
| Participant timeline | 13  | Time schedule of enrolment, interventions (including any run-ins and washouts), assessments, and visits for participants. A schematic diagram is highly recommended (see Figure)                                                                                                                                                                                               | 6-8 |

|   |             |    |                                                                                                                                                                                       |              |
|---|-------------|----|---------------------------------------------------------------------------------------------------------------------------------------------------------------------------------------|--------------|
| 1 |             |    |                                                                                                                                                                                       |              |
| 2 |             |    |                                                                                                                                                                                       |              |
| 3 | Sample size | 14 | Estimated number of participants needed to achieve study objectives and how it was determined, including clinical and statistical assumptions supporting any sample size calculations | _____11_____ |
| 4 |             |    |                                                                                                                                                                                       |              |
| 5 | Recruitment | 15 | Strategies for achieving adequate participant enrolment to reach target sample size                                                                                                   | _____6_____  |
| 6 |             |    |                                                                                                                                                                                       |              |
| 7 |             |    |                                                                                                                                                                                       |              |

### 8 **Methods: Assignment of interventions (for controlled trials)**

#### 9 Allocation:

|    |                                  |     |                                                                                                                                                                                                                                                                                                                                                          |              |
|----|----------------------------------|-----|----------------------------------------------------------------------------------------------------------------------------------------------------------------------------------------------------------------------------------------------------------------------------------------------------------------------------------------------------------|--------------|
| 10 |                                  |     |                                                                                                                                                                                                                                                                                                                                                          |              |
| 11 |                                  |     |                                                                                                                                                                                                                                                                                                                                                          |              |
| 12 | Sequence generation              | 16a | Method of generating the allocation sequence (eg, computer-generated random numbers), and list of any factors for stratification. To reduce predictability of a random sequence, details of any planned restriction (eg, blocking) should be provided in a separate document that is unavailable to those who enrol participants or assign interventions | _____5_____  |
| 13 |                                  |     |                                                                                                                                                                                                                                                                                                                                                          |              |
| 14 |                                  |     |                                                                                                                                                                                                                                                                                                                                                          |              |
| 15 |                                  |     |                                                                                                                                                                                                                                                                                                                                                          |              |
| 16 |                                  |     |                                                                                                                                                                                                                                                                                                                                                          |              |
| 17 | Allocation concealment mechanism | 16b | Mechanism of implementing the allocation sequence (eg, central telephone; sequentially numbered, opaque, sealed envelopes), describing any steps to conceal the sequence until interventions are assigned                                                                                                                                                | _____5_____  |
| 18 |                                  |     |                                                                                                                                                                                                                                                                                                                                                          |              |
| 19 |                                  |     |                                                                                                                                                                                                                                                                                                                                                          |              |
| 20 |                                  |     |                                                                                                                                                                                                                                                                                                                                                          |              |
| 21 | Implementation                   | 16c | Who will generate the allocation sequence, who will enrol participants, and who will assign participants to interventions                                                                                                                                                                                                                                | _____5_____  |
| 22 |                                  |     |                                                                                                                                                                                                                                                                                                                                                          |              |
| 23 |                                  |     |                                                                                                                                                                                                                                                                                                                                                          |              |
| 24 | Blinding (masking)               | 17a | Who will be blinded after assignment to interventions (eg, trial participants, care providers, outcome assessors, data analysts), and how                                                                                                                                                                                                                | _____NA_____ |
| 25 |                                  |     |                                                                                                                                                                                                                                                                                                                                                          |              |
| 26 |                                  |     |                                                                                                                                                                                                                                                                                                                                                          |              |
| 27 |                                  | 17b | If blinded, circumstances under which unblinding is permissible, and procedure for revealing a participant's allocated intervention during the trial                                                                                                                                                                                                     | _____NA_____ |
| 28 |                                  |     |                                                                                                                                                                                                                                                                                                                                                          |              |
| 29 |                                  |     |                                                                                                                                                                                                                                                                                                                                                          |              |
| 30 |                                  |     |                                                                                                                                                                                                                                                                                                                                                          |              |

### 31 **Methods: Data collection, management, and analysis**

|    |                         |     |                                                                                                                                                                                                                                                                                                                                                                                                              |                |
|----|-------------------------|-----|--------------------------------------------------------------------------------------------------------------------------------------------------------------------------------------------------------------------------------------------------------------------------------------------------------------------------------------------------------------------------------------------------------------|----------------|
| 32 |                         |     |                                                                                                                                                                                                                                                                                                                                                                                                              |                |
| 33 | Data collection methods | 18a | Plans for assessment and collection of outcome, baseline, and other trial data, including any related processes to promote data quality (eg, duplicate measurements, training of assessors) and a description of study instruments (eg, questionnaires, laboratory tests) along with their reliability and validity, if known. Reference to where data collection forms can be found, if not in the protocol | _____7-11_____ |
| 34 |                         |     |                                                                                                                                                                                                                                                                                                                                                                                                              |                |
| 35 |                         |     |                                                                                                                                                                                                                                                                                                                                                                                                              |                |
| 36 |                         |     |                                                                                                                                                                                                                                                                                                                                                                                                              |                |
| 37 |                         |     |                                                                                                                                                                                                                                                                                                                                                                                                              |                |
| 38 |                         | 18b | Plans to promote participant retention and complete follow-up, including list of any outcome data to be collected for participants who discontinue or deviate from intervention protocols                                                                                                                                                                                                                    | _____6_____    |
| 39 |                         |     |                                                                                                                                                                                                                                                                                                                                                                                                              |                |
| 40 |                         |     |                                                                                                                                                                                                                                                                                                                                                                                                              |                |
| 41 |                         |     |                                                                                                                                                                                                                                                                                                                                                                                                              |                |
| 42 |                         |     |                                                                                                                                                                                                                                                                                                                                                                                                              |                |
| 43 |                         |     |                                                                                                                                                                                                                                                                                                                                                                                                              |                |
| 44 |                         |     |                                                                                                                                                                                                                                                                                                                                                                                                              |                |
| 45 |                         |     |                                                                                                                                                                                                                                                                                                                                                                                                              |                |
| 46 |                         |     |                                                                                                                                                                                                                                                                                                                                                                                                              |                |
| 47 |                         |     |                                                                                                                                                                                                                                                                                                                                                                                                              |                |



1  
2  
3 Data management 19 Plans for data entry, coding, security, and storage, including any related processes to promote data quality \_\_\_\_\_11\_\_\_\_\_

4 (eg, double data entry; range checks for data values). Reference to where details of data management

5 procedures can be found, if not in the protocol

6

7 Statistical methods 20a Statistical methods for analysing primary and secondary outcomes. Reference to where other details of the \_\_\_\_\_11\_\_\_\_\_

8 statistical analysis plan can be found, if not in the protocol

9

10 20b Methods for any additional analyses (eg, subgroup and adjusted analyses) \_\_\_\_\_NA\_\_\_\_\_

11

12 20c Definition of analysis population relating to protocol non-adherence (eg, as randomised analysis), and any

13 statistical methods to handle missing data (eg, multiple imputation) \_\_\_\_\_NA\_\_\_\_\_

14

15 **Methods: Monitoring**

16

17 Data monitoring 21a Composition of data monitoring committee (DMC); summary of its role and reporting structure; statement of \_\_\_\_\_NA\_\_\_\_\_

18 whether it is independent from the sponsor and competing interests; and reference to where further details

19 about its charter can be found, if not in the protocol. Alternatively, an explanation of why a DMC is not

20 needed

21

22 21b Description of any interim analyses and stopping guidelines, including who will have access to these interim \_\_\_\_\_NA\_\_\_\_\_

23 results and make the final decision to terminate the trial

24

25 Harms 22 Plans for collecting, assessing, reporting, and managing solicited and spontaneously reported adverse \_\_\_\_\_NA\_\_\_\_\_

26 events and other unintended effects of trial interventions or trial conduct

27

28 Auditing 23 Frequency and procedures for auditing trial conduct, if any, and whether the process will be independent \_\_\_\_\_NA\_\_\_\_\_

29 from investigators and the sponsor

30

31

32 **Ethics and dissemination**

33

34 Research ethics 24 Plans for seeking research ethics committee/institutional review board (REC/IRB) approval \_\_\_\_\_12\_\_\_\_\_

35 approval

36

37 Protocol 25 Plans for communicating important protocol modifications (eg, changes to eligibility criteria, outcomes, \_\_\_\_\_5\_\_\_\_\_

38 amendments analyses) to relevant parties (eg, investigators, REC/IRBs, trial participants, trial registries, journals,

39 regulators)

40

41

42

43

44

45

46

47

|    |                               |     |                                                                                                                                                                                                                                                                                     |                        |
|----|-------------------------------|-----|-------------------------------------------------------------------------------------------------------------------------------------------------------------------------------------------------------------------------------------------------------------------------------------|------------------------|
| 1  |                               |     |                                                                                                                                                                                                                                                                                     |                        |
| 2  |                               |     |                                                                                                                                                                                                                                                                                     |                        |
| 3  | Consent or assent             | 26a | Who will obtain informed consent or assent from potential trial participants or authorised surrogates, and how (see Item 32)                                                                                                                                                        | _____6_____            |
| 4  |                               |     |                                                                                                                                                                                                                                                                                     |                        |
| 5  |                               |     |                                                                                                                                                                                                                                                                                     |                        |
| 6  |                               | 26b | Additional consent provisions for collection and use of participant data and biological specimens in ancillary studies, if applicable                                                                                                                                               | _____NA_____           |
| 7  |                               |     |                                                                                                                                                                                                                                                                                     |                        |
| 8  | Confidentiality               | 27  | How personal information about potential and enrolled participants will be collected, shared, and maintained in order to protect confidentiality before, during, and after the trial                                                                                                | _____NA_____           |
| 9  |                               |     |                                                                                                                                                                                                                                                                                     |                        |
| 10 |                               |     |                                                                                                                                                                                                                                                                                     |                        |
| 11 | Declaration of interests      | 28  | Financial and other competing interests for principal investigators for the overall trial and each study site                                                                                                                                                                       | _____12_____           |
| 12 |                               |     |                                                                                                                                                                                                                                                                                     |                        |
| 13 |                               |     |                                                                                                                                                                                                                                                                                     |                        |
| 14 | Access to data                | 29  | Statement of who will have access to the final trial dataset, and disclosure of contractual agreements that limit such access for investigators                                                                                                                                     | _____NA_____           |
| 15 |                               |     |                                                                                                                                                                                                                                                                                     |                        |
| 16 |                               |     |                                                                                                                                                                                                                                                                                     |                        |
| 17 | Ancillary and post-trial care | 30  | Provisions, if any, for ancillary and post-trial care, and for compensation to those who suffer harm from trial participation                                                                                                                                                       | _____NA_____           |
| 18 |                               |     |                                                                                                                                                                                                                                                                                     |                        |
| 19 |                               |     |                                                                                                                                                                                                                                                                                     |                        |
| 20 | Dissemination policy          | 31a | Plans for investigators and sponsor to communicate trial results to participants, healthcare professionals, the public, and other relevant groups (eg, via publication, reporting in results databases, or other data sharing arrangements), including any publication restrictions | _____12_____           |
| 21 |                               |     |                                                                                                                                                                                                                                                                                     |                        |
| 22 |                               |     |                                                                                                                                                                                                                                                                                     |                        |
| 23 |                               |     |                                                                                                                                                                                                                                                                                     |                        |
| 24 |                               |     |                                                                                                                                                                                                                                                                                     |                        |
| 25 |                               | 31b | Authorship eligibility guidelines and any intended use of professional writers                                                                                                                                                                                                      | _____NA_____           |
| 26 |                               |     |                                                                                                                                                                                                                                                                                     |                        |
| 27 |                               | 31c | Plans, if any, for granting public access to the full protocol, participant-level dataset, and statistical code                                                                                                                                                                     | _____5_____            |
| 28 |                               |     |                                                                                                                                                                                                                                                                                     |                        |
| 29 | <b>Appendices</b>             |     |                                                                                                                                                                                                                                                                                     |                        |
| 30 |                               |     |                                                                                                                                                                                                                                                                                     |                        |
| 31 | Informed consent materials    | 32  | Model consent form and other related documentation given to participants and authorised surrogates                                                                                                                                                                                  | Supplementary material |
| 32 |                               |     |                                                                                                                                                                                                                                                                                     |                        |
| 33 |                               |     |                                                                                                                                                                                                                                                                                     |                        |
| 34 | Biological specimens          | 33  | Plans for collection, laboratory evaluation, and storage of biological specimens for genetic or molecular analysis in the current trial and for future use in ancillary studies, if applicable                                                                                      | _____9_____            |
| 35 |                               |     |                                                                                                                                                                                                                                                                                     |                        |
| 36 |                               |     |                                                                                                                                                                                                                                                                                     |                        |

37 \*It is strongly recommended that this checklist be read in conjunction with the SPIRIT 2013 Explanation & Elaboration for important clarification on the items.  
 38 Amendments to the protocol should be tracked and dated. The SPIRIT checklist is copyrighted by the SPIRIT Group under the Creative Commons  
 39 "[Attribution-NonCommercial-NoDerivs 3.0 Unported](https://creativecommons.org/licenses/by-nc-nd/3.0/)" license.  
 40

# BMJ Open

## Cardiovascular disease risk marker responses to breaking up prolonged sedentary time in individuals with paraplegia: the Spinal Cord Injury Move More (SCIMM) randomised crossover laboratory trial protocol

|                                 |                                                                                                                                                                                                                                                                                                                                                                                                                                                                                                                                                                                                                                                                                                                                                                                                                                                                                                       |
|---------------------------------|-------------------------------------------------------------------------------------------------------------------------------------------------------------------------------------------------------------------------------------------------------------------------------------------------------------------------------------------------------------------------------------------------------------------------------------------------------------------------------------------------------------------------------------------------------------------------------------------------------------------------------------------------------------------------------------------------------------------------------------------------------------------------------------------------------------------------------------------------------------------------------------------------------|
| Journal:                        | <i>BMJ Open</i>                                                                                                                                                                                                                                                                                                                                                                                                                                                                                                                                                                                                                                                                                                                                                                                                                                                                                       |
| Manuscript ID                   | bmjopen-2018-021936.R1                                                                                                                                                                                                                                                                                                                                                                                                                                                                                                                                                                                                                                                                                                                                                                                                                                                                                |
| Article Type:                   | Protocol                                                                                                                                                                                                                                                                                                                                                                                                                                                                                                                                                                                                                                                                                                                                                                                                                                                                                              |
| Date Submitted by the Author:   | 09-Apr-2018                                                                                                                                                                                                                                                                                                                                                                                                                                                                                                                                                                                                                                                                                                                                                                                                                                                                                           |
| Complete List of Authors:       | Withers, Thomas; University of Bedfordshire, Institute for Sport Science and Physical Activity Research, School of Sport Science and Physical Activity<br>Croft, Louise; University of Bedfordshire, Institute for Sport Science and Physical Activity Research, School of Sport Science and Physical Activity<br>Goosey-Tolfrey, Victoria L; Loughborough University, School of Sport, Exercise and Health Sciences, The Peter Harrison Centre for Disability Sport<br>Dunstan, David; Baker Heart and Diabetes Institute; Australian Catholic University, Mary MacKillop Institute for Health Research<br>Leicht, Christof; Loughborough University, School of Sport, Exercise and Health Sciences, The Peter Harrison Centre for Disability Sport<br>Bailey, Daniel; University of Bedfordshire, Institute for Sport and Physical Activity Research, School of Sport Science and Physical Activity |
| <b>Primary Subject Heading</b>: | Sports and exercise medicine                                                                                                                                                                                                                                                                                                                                                                                                                                                                                                                                                                                                                                                                                                                                                                                                                                                                          |
| Secondary Subject Heading:      | Public health                                                                                                                                                                                                                                                                                                                                                                                                                                                                                                                                                                                                                                                                                                                                                                                                                                                                                         |
| Keywords:                       | physical activity, sedentary lifestyle, activity breaks, glucose, cardiovascular disease, spinal cord injury                                                                                                                                                                                                                                                                                                                                                                                                                                                                                                                                                                                                                                                                                                                                                                                          |
|                                 |                                                                                                                                                                                                                                                                                                                                                                                                                                                                                                                                                                                                                                                                                                                                                                                                                                                                                                       |

SCHOLARONE™  
Manuscripts

1  
2  
3 **Cardiovascular disease risk marker responses to breaking up prolonged sedentary**  
4 **time in individuals with paraplegia: the Spinal Cord Injury Move More (SCIMM)**  
5 **randomised crossover laboratory trial protocol**  
6  
7  
8  
9

10 **Authors**

11  
12 T. M. Withers, PhD: thomas.withers@beds.ac.uk, Institute for Sport Science and Physical  
13 Activity Research, School of Sport Science and Physical Activity, University of Bedfordshire,  
14 Polhill Avenue, Bedford, MK41 9EA, United Kingdom

15  
16 L. Croft, PhD: louise.croft@beds.ac.uk, Institute for Sport Science and Physical Activity  
17 Research, School of Sport Science and Physical Activity, University of Bedfordshire, Polhill  
18 Avenue, Bedford, MK41 9EA, United Kingdom.

19  
20 V. L. Goosey-Tolfrey, PhD: V.L.Tolfrey@lboro.ac.uk, School of Sport, Exercise and Health  
21 Sciences, The Peter Harrison Centre for Disability Sport, Loughborough University, Epinal  
22 Way, LE11 3TU, United Kingdom.

23  
24 D.W. Dunstan, PhD: david.dunstan@baker.edu.au, 1<sup>st</sup> affiliation: Baker Heart and Diabetes  
25 Institute, PO Box 6492, St Kilda Road Central, Victoria 8008, Melbourne, Victoria, Australia;  
26 2<sup>nd</sup> affiliation: Mary MacKillop Institute for Health Research, Australian Catholic University,  
27 Melbourne, Victoria, Australia 3000.

28  
29 C.A. Leicht, PhD: c.a.leicht@lboro.ac.uk, School of Sport, Exercise and Health Sciences,  
30 The Peter Harrison Centre for Disability Sport, Loughborough University, Epinal Way, LE11  
31 3TU, United Kingdom.

32  
33 D.P. Bailey, PhD: daniel.bailey@beds.ac.uk, Institute for Sport Science and Physical Activity  
34 Research, School of Sport Science and Physical Activity, University of Bedfordshire, Polhill  
35 Avenue, Bedford, MK41 9EA, United Kingdom.  
36  
37

38 **Corresponding author**

39  
40 D.P. Bailey, PhD: daniel.bailey@beds.ac.uk, Institute for Sport Science and Physical Activity  
41 Research, University of Bedfordshire, Polhill Avenue, Bedford, MK41 9EA  
42

43 **Word count:** 3531

44  
45 **Sources of funding:** This work is supported by Heart Research UK grant number  
46 RG2655/17/18.

47  
48 **Conflicts of interest:** None of the authors have declared any conflicts of interest.  
49

50 **Study start date:** 19<sup>th</sup> May 2017

51 **Study end date:** 18<sup>th</sup> January 2019  
52  
53  
54  
55  
56  
57  
58  
59

## 1 **Abstract**

2 **Introduction:** Sedentary behaviour is a distinct risk factor for cardiovascular disease (CVD)  
3 and could partly explain the increased prevalence of CVD in people with spinal cord injury  
4 (SCI). Interrupting prolonged sitting periods with regular short bouts of walking acutely  
5 suppresses postprandial glucose and lipids in able-bodied individuals. However, the acute  
6 CVD risk marker response to breaking up prolonged sedentary time in people with SCI has  
7 not been investigated. **Methods and analysis:** A randomised two-condition laboratory  
8 crossover trial will compare: 1) breaking up prolonged sedentary time with 2 min moderate-  
9 intensity arm crank activity every 20 min, with 2) uninterrupted prolonged sedentary time  
10 (control) in people with SCI. Outcomes will include acute effects on postprandial glucose,  
11 insulin, lipids and blood pressure. Blood samples will be collected and blood pressure  
12 measured at regular intervals during each 5.5 h condition. **Ethics and dissemination:** This  
13 study was approved by the Cambridge South NHS Research Ethics Committee. This  
14 research will help determine if breaking up prolonged sedentary time could be effective in  
15 lowering CVD risk in people with SCI. The findings of the research will be published in a peer  
16 review journal and disseminated to relevant user groups. **Trial registration:** The study is  
17 registered as a clinical trial on the ISRCTN register (trial ID: ISRCTN51868437).

## 19 **Strengths and limitations of this study**

- 20 • This study uses a randomised crossover design to investigate, for the first time,  
21 cardiovascular disease risk marker responses to breaking up prolonged sedentary  
22 time in individuals with paraplegia.
- 23 • Regular collection of blood samples will permit robust time course and incremental  
24 area under the curve calculations for primary and secondary outcomes.
- 25 • Due to the acute nature of the study, the long-term cardiovascular disease risk  
26 marker responses to a chronic intervention will remain unknown.

1  
2  
3  
4  
5  
6  
7  
8  
9  
10  
11  
12  
13  
14  
15  
16  
17  
18  
19  
20  
21  
22  
23  
24  
25  
26  
27  
28  
29  
30  
31  
32  
33  
34  
35  
36  
37  
38  
39  
40  
41  
42  
43  
44  
45  
46  
47  
48  
49  
50  
51  
52  
53  
54  
55  
56  
57  
58  
59  
60

27 • The cardiovascular disease risk marker responses to breaking up prolonged  
28 sedentary time in people with tetraplegia still requires investigation.

29  
30 **Keywords:** physical activity; sedentary lifestyle; activity breaks; glucose; cardiovascular  
31 disease; spinal cord injury

For peer review only

## 32 Introduction

33 There is a global incident rate of 180,000 traumatic spinal cord injury (SCI) cases each year  
34 with a prevalence of over 40,000 in the UK [1, 2]. Cardiovascular disease (CVD) is a leading  
35 cause of death in individuals with SCI [3] and this population have a significantly increased  
36 risk of heart disease and stroke compared with able-bodied individuals [4]. Traditional risk  
37 factors for CVD include impaired glucose tolerance, central obesity, high triglycerides, low  
38 high-density lipoprotein cholesterol (HDL), and high blood pressure. These risk factors often  
39 exacerbate significantly as a consequence of SCI [5] and a plethora of research has  
40 documented impaired glucose tolerance and adverse lipid profiles in individuals with SCI [5,  
41 6]. The clustering of  $\geq 2$  and  $\geq 3$  risk factors is prevalent in 87% and 72% of SCI individuals,  
42 respectively [7], which is markedly higher compared with the able-bodied population [8]. This  
43 milieu of metabolic disturbances after SCI may be due to increases in body fat resulting from  
44 an imbalance in energy intake and expenditure [5]. Excess fat accumulation, particularly in  
45 the visceral region, is associated with inflammation that is causal in glucose intolerance and  
46 dyslipidaemia [5, 9] thus promoting atherogenesis that would increase the risk of CVD in this  
47 population [10].

48  
49 Postprandial glucose and lipid concentrations are strong independent predictors of future  
50 CVD incidence, even in those without diabetes [11]. There is a dose-response relationship  
51 between postprandial glucose area under the curve (AUC) and CVD risk, while progression  
52 of carotid atherosclerosis can be prevented by attenuation of postprandial glucose  
53 concentrations [12, 13]. Impaired postprandial glucose metabolism was observed in 50%  
54 and 62% of individuals with paraplegia and tetraplegia, respectively, compared with 18% in  
55 able-bodied individuals [6]. This impaired glucose intolerance in SCI is characterised by  
56 hyperinsulinaemia, which suggests that there is tissue level resistance to insulin [14]. In  
57 paraplegic individuals, there appears to be no difference in postprandial glucose responses  
58 between those with complete versus incomplete lesions [15, 16]. Although postprandial  
59 lipaemic responses have not been compared between individuals with complete and

1  
2  
3 60 incomplete lesions, fasting lipid levels do not differ between these groups [17]. There does,  
4  
5 61 however, appear to be an exaggerated postprandial lipaemic response in individuals with  
6  
7 62 paraplegia compared with able-bodied individuals [18]. These observations are of potential  
8  
9 63 concern as the high dietary intake of carbohydrate and fat in individuals with SCI [19] may  
10  
11 64 lead to repeated exaggerated elevations in glucose and lipids following food intake. It is thus  
12  
13 65 pertinent to identify interventions to reduce postprandial glucose and lipid responses in  
14  
15 66 individuals with SCI to reduce their CVD risk.

16  
17 67  
18  
19 68 Physical activity guidelines have been developed specifically for this population that  
20  
21 69 recommend engaging in at least 30 min of moderate-to-vigorous physical activity (MVPA)  
22  
23 70 three times per week for CVD health benefits [20]. However, it is estimated that 37 to 50% of  
24  
25 71 this population engage in no leisure-time physical activity whatsoever [21, 22]. Reduced  
26  
27 72 levels of physical activity are proposed to largely account for the increased CVD risk in SCI  
28  
29 73 with reduced levels of leisure-time physical activity associated with increased body fat,  
30  
31 74 insulin resistance, and systolic blood pressure [22, 23]. However, sedentary behaviour (i.e.  
32  
33 75 any waking behaviour in a sitting, reclining or lying posture with low energy expenditure  
34  
35 76 [24]), is now recognised as being a significant CVD risk factor in the able-bodied population,  
36  
37 77 independent of MVPA [25]. Experimental studies in able-bodied individuals have reported an  
38  
39 78 acute reduction in postprandial glucose, insulin, triglycerides and blood pressure in response  
40  
41 79 to breaking up prolonged sedentary time with 2 min bouts of light or moderate-intensity  
42  
43 80 walking every 20 min [26-29]. However, no research has examined whether postprandial  
44  
45 81 CVD risk marker responses are attenuated in response to breaking up prolonged sedentary  
46  
47 82 time in individuals with SCI.

48  
49 83  
50  
51 84 The primary aim of this study is therefore to compare the acute CVD risk marker responses  
52  
53 85 in individuals with SCI to 1) breaking up prolonged sedentary time, with 2) uninterrupted  
54  
55 86 sedentary time. The CVD risk markers that will be studied include postprandial glucose  
56  
57 87 (primary outcome), insulin and lipids, and systolic and diastolic blood pressure (secondary



1  
2  
3 88 outcomes) based on evidence that these markers predict CVD outcomes and are adversely  
4  
5 89 affected by SCI. It is hypothesised that breaking up prolonged sedentary time will result in  
6  
7 90 favourable CVD risk marker responses compared with uninterrupted sedentary time in  
8  
9 91 individuals with paraplegia. This could identify a novel strategy for the prevention of CVD in  
10  
11 92 SCI that would warrant further evaluation.

12  
13 93

## 14 94 **Methods and analysis**

### 15 95 *Study design*

16  
17 96 A randomised two-condition crossover design will be used in accordance with the SPIRIT  
18  
19 97 statement [30]. The study is registered as a clinical trial on the ISRCTN register (trial ID:  
20  
21 98 ISRCTN51868437). The study schedule can be seen in Figure 1. All research will take place  
22  
23 99 at the University of Bedfordshire Sport and Exercise Science Laboratories. After preliminary  
24  
25 100 measures, participants will complete two experimental conditions in a randomised order. The  
26  
27 101 conditions will be separated by  $\geq 6$  days to eliminate any potential carryover effects.  
28  
29 102 Condition order will be randomised by a researcher independent from the study using  
30  
31 103 computer generated random numbers (block randomisation with balanced block sizes).  
32  
33 104

34  
35  
36 105 Figure 1 about here.

37  
38 106

### 39 107 *Participants*

40  
41 108 *Inclusion criteria:* Males and females aged 18-60 years; chronic SCI ( $\geq 1$  year since injury);  
42  
43 109 individuals with a traumatic SCI below T5 (mid to low level paraplegia); individuals with a  
44  
45 110 non-traumatic SCI (as defined by the International Spinal Cord Injury Data Sets for non-  
46  
47 111 traumatic SCI [31]) that present with mid to low level paraplegia. Including only individuals  
48  
49 112 with injuries below T5 will ensure sympathetic innervation to the major organs at the T5 level  
50  
51 113 so that heart rate and catecholamine responses would be unaffected by injury [32] and thus  
52  
53 114 minimise the potential that innervation variations could have on the study outcomes.  
54  
55 115 Paraplegic individuals who have complete or incomplete lesions will be included based on  
56  
57  
58  
59  
60

1  
2  
3 116 evidence that these groups do not differ with respect to postprandial glucose metabolism  
4  
5 117 (primary outcome) [15, 16]. Individuals who express an interest in taking part in the study will  
6  
7 118 be required to indicate their spinal cord lesion level and completeness of injury via a  
8  
9 119 questionnaire and asked to provide the research team with a copy of medical records to  
10  
11 120 confirm injury level and ASIA impairment scale classification prior to preliminary measures.

12  
13 121

14 122 *Exclusion criteria:* individuals who regularly engage in >300 min/week of MVPA as such high  
15  
16 123 levels of physical activity may offset the detrimental association of sedentary time with health  
17  
18 124 outcomes [33]; history of severe cardiovascular complications; hypotension (resting blood  
19  
20 125 pressure <90/60 mmHg); body mass index >45 kg/m<sup>2</sup>; a history of autonomic dysreflexia;  
21  
22 126 pregnancy; taking glucose lowering medication; smokers; diagnosed diabetes, renal failure,  
23  
24 127 liver disease, major illness, or other health issues that may limit ability to perform the  
25  
26 128 physical activity protocols.

27  
28  
29 129

### 30 130 *Recruitment*

31  
32 131 Participants will be recruited through organisations and charities relevant to individuals with  
33  
34 132 SCI, including the National Spinal Injuries Centre, Stoke Mandeville Hospital,  
35  
36 133 Buckinghamshire NHS Healthcare Trust; local sport and activity clubs; and local community  
37  
38 134 groups. Mail outs, social media, information on websites, posters, flyers, and visits from the  
39  
40 135 research team will be used to provide information on the study to potentially eligible  
41  
42 136 individuals who can then express their interest to the research team in taking part in the  
43  
44 137 study. Written informed consent will be obtained by a member of the research team prior to  
45  
46 138 participation in any testing protocols (see supplementary file). As an incentive, participants  
47  
48 139 will receive a £25 shopping gift voucher for each main condition they complete and will have  
49  
50 140 all travel expenses paid.

51  
52 141

### 53 54 142 *Preliminary measures*

1  
2  
3 143 Participants will attend a preliminary testing session where they will have body mass  
4  
5 144 measured using wheelchair double beam scales (300 series; Marsden, London, UK).  
6  
7 145 They will also have body fat and lean tissue mass (and percent) determined for the  
8  
9 146 whole body and regionally via whole-body scans using dual-energy x-ray absorptiometry  
10  
11 147 (DXA; GE Medical Systems; Chalfont St Giles, UK) in line with previous research [34-36].  
12  
13 148 During DXA measures, participants will be positioned as closely as possible to standard  
14  
15 149 protocols and Velcro restraints will be fastened around the participants' knees and ankles to  
16  
17 150 maintain correct position of the legs during scanning. Participants will be offered a wedge to  
18  
19 151 be used as a pillow for comfort. Waist circumference will be measured using International  
20  
21 152 Standards for Anthropometric Assessment (ISAK) guidelines [37, 38]. These measures will  
22  
23 153 be taken in the standing position for participants who are able to maintain this posture and in  
24  
25 154 a supine position for participants who are not able to stand [38]. Resting blood pressure will  
26  
27 155 be measured on the left arm, while seated, three times after the participant has rested for 5  
28  
29 156 min with the lowest readings being recorded. Following this, participants will be familiarised  
30  
31 157 with use of the Borg 6-20 Rating of Perceived Exertion (RPE) scale [39]. They will then cycle  
32  
33 158 using an arm ergometer (Lode Angio; Lode, Netherlands) to determine the intensity (power  
34  
35 159 output) that yields an RPE of 13 (somewhat hard) in line with previous sedentary behaviour  
36  
37 160 research [26, 40]. Participants will be asked to cycle at ~70 rpm during the test. The test will  
38  
39 161 start at a low intensity (~20 Watts) and the participants will then indicate their RPE at 1 min  
40  
41 162 intervals. The resistance will then be increased by 5-20 Watts based on the participants'  
42  
43 163 RPE until an RPE of 13 has been achieved, at which point the test will be terminated. The  
44  
45 164 test is expected to take no longer than 15 min. The intensity that corresponds to an RPE of  
46  
47 165 13 during the test will be recorded for each participant and used for the physical activity  
48  
49 166 breaks described in the respective main condition below. The use of the Borg 6-20 RPE  
50  
51 167 scale has acceptable validity in individuals with SCI to determine physical activity intensity  
52  
53 168 [41]. This method is also suggested as a practical approach for health care professionals  
54  
55  
56  
57  
58  
59  
60

1  
2  
3 169 and scientists as oxygen consumption testing equipment is costly and not available in many  
4  
5 170 rehabilitation centres and community settings [41].  
6

7 171

8  
9 172 *Experimental protocol*

10  
11 173 Figure 2 shows the experimental protocol. Participants will be instructed to refrain from  
12  
13 174 caffeine, alcohol and exercise for 48 h prior to each experimental condition. They will also be  
14  
15 175 provided with a food diary and digital weighing scales to record volume and timings of all  
16  
17 176 food and liquids consumed in the 24 h period prior to the first experimental condition.  
18  
19 177 Participants will be asked to replicate their diet the day prior to the subsequent experimental  
20  
21 178 condition [42]. On condition days, participants will attend in the morning following an  
22  
23 179 overnight fast and avoid active travel to the laboratory. Upon arrival, resting blood pressure  
24  
25 180 will be measured after 5 min rest; two measures will be taken and the lowest of these  
26  
27 181 recorded. A fasting capillary blood sample will then be collected. Participants will commence  
28  
29 182 the 5.5 h condition period following consumption of a standardised breakfast. The two  
30  
31 183 experimental conditions are as follows:

32 184

- 34 185 1. *Uninterrupted sedentary time (SED)*: participants will remain seated and inactive in their  
35  
36 186 wheelchair or a standard chair at a desk during this condition.  
37  
38 187 2. *Sedentary time interrupted with physical activity breaks (SED-ACT)*: participants will  
39  
40 188 complete 2 min of moderate-intensity arm crank activity every 20 min at ~70 rpm using  
41  
42 189 the Lode Angio arm ergometer. These 15 breaks will equate to a total of 30 min physical  
43  
44 190 activity.  
45

46 191

48 192 Figure 2 about here.  
49

50 193

52 194 The SED-ACT protocol was selected based on previous research that reported a significant  
53  
54 195 reduction in 5 h postprandial glucose in response to breaking up prolonged sitting time with 2  
55  
56 196 min light-intensity walking every 20 min versus uninterrupted sitting in able-bodied  
57

1  
2  
3 197 participants [28]. An RPE of 13 for the physical activity intensity was selected in line with  
4  
5 198 previous research [26, 42] and the Borg 6-20 RPE scale may be used to assess and  
6  
7 199 regulate upper-body physical activity at moderate-to-vigorous intensity in adults with chronic  
8  
9 200 SCI [41]. Moderate-intensity physical activity was selected as it is well-tolerated, can be  
10  
11 201 performed safely, and is recommended for health risk reduction in individuals with SCI [20,  
12  
13 202 43].

14  
15 203

16  
17 204 Participants will be permitted to work on a laptop computer, read, talk, or watch DVDs during  
18  
19 205 each condition. This will be standardised by asking participants to engage in the same  
20  
21 206 activities during each of the two experimental conditions. Except during the activity bouts,  
22  
23 207 participants will remain inactive and only leave their desk to void and consume standardised  
24  
25 208 meals in a kitchen adjacent to the test laboratory; participants will be aided by a member of  
26  
27 209 the research team when moving to these locations so that they remain inactive. A researcher  
28  
29 210 will be present to ensure compliance with the protocols throughout all conditions.

30  
31 211

### 32 212 *Meal and water consumption*

33  
34 213 Standardised meals will be consumed immediately prior to the start of each experimental  
35  
36 214 condition and at 3 h, each providing 30% of estimated daily energy requirements for each  
37  
38 215 participant [44]. Participants will be asked to consume each meal within a 15 min time  
39  
40 216 period. The time taken to consume the meals will be recorded for the first condition and  
41  
42 217 participants will be asked to replicate this time as closely as possible in the subsequent  
43  
44 218 condition. Breakfast will consist of bran flakes, whole milk, croissant, butter and orange juice  
45  
46 219 (55% carbohydrate, 34% fat, 12% protein) and lunch will be a chicken sandwich, salted  
47  
48 220 crisps and apple (54% carbohydrate, 34% fat, 13% protein). The macronutrient composition  
49  
50 221 of meals in the current study was selected as it is generally representative of UK guidelines  
51  
52 222 for a balanced diet [45]. The glycaemic index for these breakfast and lunch meals is 43 and  
53  
54 223 72, respectively. Glycaemic index values for each food item were obtained from the  
55  
56 224 International Tables of Glycaemic Index and Glycaemic Load Values 2008 [46] and meal

1  
2  
3 225 glycaemic index was calculated using weighted means of the glycaemic index values for the  
4  
5 226 component foods [47]. Water will be available ad libitum during the first condition and this  
6  
7 227 volume of intake will be provided at standardised regular intervals in the subsequent  
8  
9 228 condition.

10  
11 229

### 12 230 *Blood collection and biochemistry*

13  
14 231 Finger prick blood samples will be collected into two EDTA-containing microvettes  
15  
16 232 (Microvette CB300 EDTA, Sarstedt Ltd, Leicester, UK) at baseline and at 30, 60, 90, 120,  
17  
18 233 180, 210, 240, 300 and 330 min. Blood samples will be collected before the hourly activity  
19  
20 234 bouts in SED-ACT. At each time point, approximately 600  $\mu\text{L}$  of whole blood will be  
21  
22 235 collected. Blood glucose concentrations will be analysed immediately using the YSI 2300  
23  
24 236 STAT plus glucose and lactate analyzer (YSI Inc., Yellow Springs, OH, USA) from 30  $\mu\text{L}$  of  
25  
26 237 blood from one microvette. Additional 30  $\mu\text{L}$  volumes of whole blood will be aliquoted onto  
27  
28 238 two separate Reflotron test strips (Roche Diagnostics, Burgess Hill, UK) for the  
29  
30 239 measurement of triglyceride and HDL concentrations using the Reflotron Plus system  
31  
32 240 (Roche Diagnostics, Burgess Hill, UK). The remaining whole blood ( $\sim 490 \mu\text{L}$ ) will be  
33  
34 241 centrifuged at 2500 x g for 5 min (Heraeus Pico 17, Thermo Scientific, Loughborough, UK)  
35  
36 242 and the plasma then stored at  $-80^{\circ}\text{C}$ . An enzyme-linked immunosorbent assay kit will be  
37  
38 243 used to determine plasma concentrations of insulin (Mercodia, Uppsala, Sweden).

39  
40  
41 244

### 42 245 *Blood pressure*

43  
44 246 Blood pressure will be measured at baseline as described above followed by single readings  
45  
46 247 taken at 60, 120, 180, 240, 300, and 330 min. Readings will be taken 5 min before the hourly  
47  
48 248 activity bouts in SED-ACT. Blood pressure will be measured using an automated oscillatory  
49  
50 249 blood pressure monitor (Omron M5-I; Omron Matsusaka Co. Ltd., Matsusaka, Japan).

51  
52  
53 250

### 54 251 *Study outcomes*

1  
2  
3 252 *Primary outcome:* the primary outcome for the study is within-participant, between condition  
4  
5 253 postprandial glucose net incremental area under the curve (iAUC) [11]. *Secondary*  
6  
7 254 *outcomes:* these include within-participant, between condition mean systolic and diastolic  
8  
9 255 blood pressure, and net iAUC for postprandial triglycerides, HDL and insulin. Positive iAUC  
10  
11 256 and total AUC will also be calculated for postprandial triglycerides, HDL and insulin to permit  
12  
13 257 comparisons with previous studies. *Feasibility measures:* to assess feasibility of the trial,  
14  
15 258 participant dropout, number of experimental sessions completed, fatigue at the beginning  
16  
17 259 and end of each day rated on an 11-point (0 “not fatigued at all” to 10 “extremely fatigued”)  
18  
19 260 Visual Analogue Scale (VAS), and the degree of difficulty in completing each experimental  
20  
21 261 condition rated on an 11-point VAS (0 “not difficult at all” to 10 “extremely difficult”) will be  
22  
23 262 recorded. Participants will also complete the Physical Activity Enjoyment Scale [48] at the  
24  
25 263 end of the SED-ACT condition and report their enjoyment on a 200 mm VAS [49]  
26  
27 264 (“Enjoyment”) 20 min after the last activity bout in the SED-ACT condition. Participants will  
28  
29 265 also report on the same scale how enjoyable they would find it to engage in this form of  
30  
31 266 physical activity most days of the week in the coming month (“Expected enjoyment”).  
32  
33 267 *Psychological outcomes:* correlates of sedentary behaviour will be measured immediately  
34  
35 268 before and after each experimental condition to explore whether participants’ mood, affect,  
36  
37 269 wellbeing, and social cognitions regarding their ability to overcome being sedentary may  
38  
39 270 differ in response to the SED-ACT condition compared with the SED condition. These  
40  
41 271 measures will be based on the COM-B framework [50] using standardised wording formats  
42  
43 272 [51] that will include overcoming barriers (self-efficacy/perceived behavioural control),  
44  
45 273 attitudes, intentions and action planning. The following questionnaires will be used: an  
46  
47 274 adapted version of the Schwarzer and Renner [52] Physical Exercise Self-Efficacy Scale to  
48  
49 275 measure self-efficacy to avoid long periods of sedentary time; current mood using the short  
50  
51 276 Positive and Negative Affect Scale [53]; psychological wellbeing using the National  
52  
53 277 Wellbeing Measurement [54]; and the Warwick Edinburgh Mental Well-Being Scale [55].  
54  
55 278 These measures will be taken within 45 min following the last bout of activity in the SED-



1  
2  
3 279 ACT condition, which is an appropriate time frame based on evidence that mood and affect  
4  
5 280 is enhanced for 3-4 hours following a single session of exercise [56].  
6

7 281

8  
9 282 *Sample size calculations*

10 283 Sample size calculations were performed using GPower [57]. Previous research reported a  
11  
12 284 16% reduction (effect size,  $F=0.61$ ) in 5 h postprandial glucose total AUC when breaking up  
13  
14 285 prolonged sedentary time with 2 min light-intensity walking every 20 min versus  
15  
16 286 uninterrupted sitting in able-bodied participants [28]. As this study will use arm cranking  
17  
18 287 (localised muscular contractions) as opposed to walking where a larger muscle mass is  
19  
20 288 required, a smaller effect may be observed. Based on this, it was estimated that 14  
21  
22 289 participants would be required for this complete two-treatment crossover design to detect a  
23  
24 290 medium effect size ( $F=0.4$ ) with a within-person correlation of 0.6, 80% power, and an  $\alpha$  of  
25  
26 291 0.05. To allow for potential withdrawals, a total of 20 participants will be recruited.  
27

28 292

29  
30 293 *Statistical analysis*

31  
32 294 Linear mixed models will be used to determine differences in the primary and secondary  
33  
34 295 outcome variables between the conditions. All models will adjust for potential covariates  
35  
36 296 explaining residual outcome variances (age, body fat% gender, lesion level, completeness of  
37  
38 297 lesion and pre-prandial outcome values). Statistical significance will be accepted as  $p<0.05$ .  
39  
40 298 Cohens' d effect sizes will be calculated to describe the magnitude of differences between  
41  
42 299 conditions [58]. Individuals' responses for CVD risk marker outcomes will also be compared  
43  
44 300 between the conditions to determine the number of participants who respond to the  
45  
46 301 experimental protocols.  
47

48 302

49  
50 303 *Patient and Public Involvement*

51  
52 304 Patients and public were not involved with the development of the research question,  
53  
54 305 outcome measures or study design, nor will they be involved with the conduct of the study.  
55



1  
2  
3 306 The recruitment plan was informed based on feedback from patients and public. A summary  
4  
5 307 of the study results will be provided to each of the study participants.  
6  
7  
8  
9  
10  
11  
12  
13  
14  
15  
16  
17  
18  
19  
20  
21  
22  
23  
24  
25  
26  
27  
28  
29  
30  
31  
32  
33  
34  
35  
36  
37  
38  
39  
40  
41  
42  
43  
44  
45  
46  
47  
48  
49  
50  
51  
52  
53  
54  
55  
56  
57  
58  
59  
60

For peer review only

1  
2  
3 308 **Ethics and dissemination**

4 309 This study was approved on the 19<sup>th</sup> May 2017 by the Cambridge South NHS Research  
5  
6 310 Ethics Committee (reference 17/EE/0076). Personal information about potential and enrolled  
7  
8 311 participants will be stored in electronic format on password protected computers or in hard  
9  
10 312 copy format in locked filing cabinets at the University of Bedfordshire. Only members of the  
11  
12 313 research team will have access to this information. All personal information will be destroyed  
13  
14 314 after a period of five years. Individuals will be referred to in anonymised fashion in any  
15  
16 315 published data.  
17

18  
19 316

20 317 The findings of this research will be disseminated to lay, academic, practice, and policy-  
21  
22 318 based audiences via presentation at conference proceedings; publication in a peer review  
23  
24 319 journal; websites, newsletters, and social media; and summary reports to policy makers and  
25  
26 320 clinical care partners. The final trial dataset will be made available as supplementary  
27  
28 321 material when the findings of the study are published in a peer review journal. Any protocol  
29  
30 322 modifications will be communicated to the Cambridge South NHS Research Ethics  
31  
32 323 Committee, recorded in the study's ISRCTN clinical trials registry, and detailed in a journal  
33  
34 324 publication of the study findings.  
35

36 325

37  
38 326 **Acknowledgements:** The authors would like to thank Dr Jan van der Scheer for providing  
39  
40 327 his advice on the design of the study protocol. We would also like to thank the patients and  
41  
42 328 public who helped to inform the recruitment strategy for this study.  
43

44 329

45  
46 330 **Author contributions**

47 331 DB and LC conceptualised the study.

48 332 TW, LC, VT, DD, CL, and DB contributed to the design of the study protocol.

49 333 TW drafted the manuscript.

50 334 TW, LC, VT, DD, CL, and DB commented and edited each section of the manuscript and  
51  
52 335 approved the final version.  
53  
54  
55  
56  
57

1  
2  
3 336

4  
5 337 **Funding statement**

6  
7 338 This work is supported by Heart Research UK grant number RG2655/17/18. The funder has  
8  
9 339 no role in the study design; collection, management, analysis, and interpretation of data;  
10  
11 340 writing of any reports; and the decision to submit any reports for publication, and will not  
12  
13 341 have authority over any of these activities.

14  
15 342

16  
17 343 **Conflicts of interest**

18  
19 344 None of the authors have declared any conflicts of interest.

20  
21 345

22  
23 346

347 **References**

- 348 1. Lee, B.B., et al., *The global map for traumatic spinal cord injury epidemiology: update*  
349 *2011, global incidence rate*. Spinal Cord, 2014. **52**(2): p. 110-6.
- 350 2. British Society of Rehabilitation Medicine, *Chronic spinal cord injury: management of*  
351 *patients in acute hospital settings: National Guidelines*. Available at  
352 <http://www.bsrn.org.uk/downloads/sciwebversion.pdf> (accessed 26 April 2016).  
353 2008.
- 354 3. Garshick, E., et al., *A prospective assessment of mortality in chronic spinal cord*  
355 *injury*. Spinal Cord, 2005. **43**(7): p. 408-16.
- 356 4. Cragg, J.J., et al., *Cardiovascular disease and spinal cord injury: results from a*  
357 *national population health survey*. Neurology, 2013. **81**(8): p. 723-8.
- 358 5. Gorgey, A.S., et al., *Effects of spinal cord injury on body composition and metabolic*  
359 *profile - part I*. J Spinal Cord Med, 2014. **37**(6): p. 693-702.
- 360 6. Bauman, W.A. and A.M. Spungen, *Disorders of carbohydrate and lipid metabolism in*  
361 *veterans with paraplegia or quadriplegia: A model of premature aging*. Metabolism,  
362 1994. **43**(6): p. 749-756.
- 363 7. Wahman, K., et al., *Cardiovascular disease risk factors in persons with paraplegia:*  
364 *the Stockholm spinal cord injury study*. J Rehabil Med, 2010. **42**(3): p. 272-8.
- 365 8. Ford, E.S., W.H. Giles, and W.H. Dietz, *Prevalence of the metabolic syndrome*  
366 *among US adults: findings from the third National Health and Nutrition Examination*  
367 *Survey*. Jama, 2002. **287**(3): p. 356-359.
- 368 9. Gater, D.R., Jr., *Obesity after spinal cord injury*. Phys Med Rehabil Clin N Am, 2007.  
369 **18**(2): p. 333-51, vii.
- 370 10. Gorgey, A.S., et al., *The effects of electrical stimulation on body composition and*  
371 *metabolic profile after spinal cord injury--Part II*. J Spinal Cord Med, 2015. **38**(1): p.  
372 23-37.
- 373 11. O'Keefe, J.H. and D.S. Bell, *Postprandial hyperglycemia/hyperlipidemia (postprandial*  
374 *dysmetabolism) is a cardiovascular risk factor*. Am J Cardiol, 2007. **100**(5): p. 899-  
375 904.
- 376 12. Esposito, K., et al., *Regression of carotid atherosclerosis by control of postprandial*  
377 *hyperglycemia in type 2 diabetes mellitus*. Circulation, 2004. **110**(2): p. 214-9.
- 378 13. Smith, N.L., et al., *Fasting and 2-hour postchallenge serum glucose measures and*  
379 *risk of incident cardiovascular events in the elderly: the Cardiovascular Health Study*.  
380 Archives of internal medicine, 2002. **162**(2): p. 209-216.
- 381 14. Duckworth, W.C., P. Jallepalli, and S.S. Solomon, *Glucose intolerance in spinal cord*  
382 *injury*. Arch Phys Med Rehabil, 1983. **64**(3): p. 107-10.

- 1  
2  
3 383 15. Bauman, W.A., et al., *The effect of residual neurological deficit on oral glucose*  
4 384 *tolerance in persons with chronic spinal cord injury*. Spinal Cord, 1999. **37**(11): p.  
5 385 765-71.  
6  
7 386 16. Raymond, J., et al., *Glucose tolerance and physical activity level in people with spinal*  
8 387 *cord injury*. Spinal Cord, 2010. **48**(8): p. 591-6.  
9  
10 388 17. Bauman, W.A., et al., *The effect of residual neurological deficit on serum lipoproteins*  
11 389 *in individuals with chronic spinal cord injury*. Spinal Cord, 1998. **36**(1): p. 13-7.  
12  
13 390 18. Nash, M.S., et al., *Evidence for an exaggerated postprandial lipemia in chronic*  
14 391 *paraplegia*. J Spinal Cord Med, 2005. **28**(4): p. 320-5.  
15  
16 392 19. Groah, S.L., et al., *Nutrient intake and body habitus after spinal cord injury: an*  
17 393 *analysis by sex and level of injury*. J Spinal Cord Med, 2009. **32**(1): p. 25-33.  
18  
19 394 20. Martin Ginis, K.A., et al., *Evidence-based scientific exercise guidelines for adults with*  
20 395 *spinal cord injury: an update and a new guideline*. 2017.  
21  
22 396 21. Martin Ginis, K.A., et al., *Leisure time physical activity in a population-based sample*  
23 397 *of people with spinal cord injury part II: activity types, intensities, and durations*. Arch  
24 398 Phys Med Rehabil, 2010. **91**(5): p. 729-33.  
25  
26 399 22. Buchholz, A.C., et al., *Greater daily leisure time physical activity is associated with*  
27 400 *lower chronic disease risk in adults with spinal cord injury*. Appl Physiol Nutr Metab,  
28 401 2009. **34**(4): p. 640-7.  
29  
30 402 23. Martin Ginis, K.A., et al., *The development of evidence-informed physical activity*  
31 403 *guidelines for adults with spinal cord injury*. Spinal Cord, 2011. **49**(11): p. 1088-96.  
32  
33 404 24. Tremblay, M.S., et al., *Sedentary Behavior Research Network (SBRN) - Terminology*  
34 405 *Consensus Project process and outcome*. Int J Behav Nutr Phys Act, 2017. **14**(1): p.  
35 406 75.  
36  
37 407 25. Dunstan, D.W., A.A. Thorp, and G.N. Healy, *Prolonged sitting: is it a distinct coronary*  
38 408 *heart disease risk factor?* Curr Opin Cardiol, 2011. **26**(5): p. 412-9.  
39  
40 409 26. Dunstan, D.W., et al., *Breaking up prolonged sitting reduces postprandial glucose*  
41 410 *and insulin responses*. Diabetes Care, 2012. **35**(5): p. 976-83.  
42  
43 411 27. Miyashita, M., et al., *Interrupting Sitting Time with Regular Walks Attenuates*  
44 412 *Postprandial Triglycerides*. Int J Sports Med, 2016. **37**(2): p. 97-103.  
45  
46 413 28. Bailey, D.P. and C.D. Locke, *Breaking up prolonged sitting with light-intensity walking*  
47 414 *improves postprandial glycemia, but breaking up sitting with standing does not*. J Sci  
48 415 Med Sport, 2015. **18**(3): p. 294-8.  
49  
50 416 29. Larsen, R.N., et al., *Breaking up prolonged sitting reduces resting blood pressure in*  
51 417 *overweight/obese adults*. Nutr Metab Cardiovasc Dis, 2014. **24**(9): p. 976-82.  
52  
53 418 30. Chan, A.-W., et al., *SPIRIT 2013 statement: defining standard protocol items for*  
54 419 *clinical trials*. Annals of internal medicine, 2013. **158**(3): p. 200-207.  
55  
56  
57  
58  
59

- 1  
2  
3 420 31. New, P.W. and R. Marshall, *International Spinal Cord Injury Data Sets for non-*  
4 421 *traumatic spinal cord injury*. Spinal Cord, 2014. **52**(2): p. 123-32.  
5  
6 422 32. Jacobs, P.L. and M.S. Nash, *Exercise recommendations for individuals with spinal*  
7 423 *cord injury*. Sports Med, 2004. **34**(11): p. 727-51.  
8  
9 424 33. Ekelund, U., et al., *Does physical activity attenuate, or even eliminate, the*  
10 425 *detrimental association of sitting time with mortality? A harmonised meta-analysis of*  
11 426 *data from more than 1 million men and women*. Lancet, 2016. **388**(10051): p. 1302-  
12 427 10.  
13  
14 428 34. Keil, M., et al., *Measurement precision of body composition variables in elite*  
15 429 *wheelchair athletes, using dual-energy X-ray absorptiometry*. European journal of  
16 430 sport science, 2016. **16**(1): p. 65-71.  
17  
18 431 35. Spungen, A.M., et al., *Factors influencing body composition in persons with spinal*  
19 432 *cord injury: a cross-sectional study*. J Appl Physiol (1985), 2003. **95**(6): p. 2398-407.  
20  
21 433 36. Gorgey, A.S., D.R. Dolbow, and D.R. Gater, Jr., *A model of prediction and cross-*  
22 434 *validation of fat-free mass in men with motor complete spinal cord injury*. Arch Phys  
23 435 Med Rehabil, 2012. **93**(7): p. 1240-5.  
24  
25 436 37. Marfell-Jones, M.J., A.D. Stewart, and J.H. De Ridder, *International standards for*  
26 437 *anthropometric assessment*. 2012.  
27  
28 438 38. Willems, A., et al., *Dual-Energy X-Ray Absorptiometry, Skinfold Thickness, and*  
29 439 *Waist Circumference for Assessing Body Composition in Ambulant and Non-*  
30 440 *Ambulant Wheelchair Games Players*. Front Physiol, 2015. **6**: p. Article 356.  
31  
32 441 39. Borg, G.A., *Psychophysical bases of perceived exertion*. Med Sci Sports Exerc,  
33 442 1982. **14**(5): p. 377-81.  
34  
35 443 40. Bailey, D.P., et al., *Effects of breaking up prolonged sitting following low and high*  
36 444 *glycaemic index breakfast consumption on glucose and insulin concentrations*. Eur J  
37 445 Appl Physiol, 2017.  
38  
39 446 41. van der Scheer, J.W., et al., *Reliability and Validity of Subjective Measures of*  
40 447 *Aerobic Intensity in Adults With Spinal Cord Injury: A Systematic Review*. PM R,  
41 448 2017.  
42  
43 449 42. Bailey, D.P., et al., *Breaking up prolonged sitting time with walking does not affect*  
44 450 *appetite or gut hormone concentrations but does induce an energy deficit and*  
45 451 *suppresses postprandial glycaemia in sedentary adults*. Appl Physiol Nutr Metab,  
46 452 2016. **41**(3): p. 324-31.  
47  
48 453 43. Burr, J.F., R.J. Shephard, and E.P. Zehr, *Physical activity after stroke and spinal cord*  
49 454 *injury: evidence-based recommendations on clearance for physical activity and*  
50 455 *exercise*. Can Fam Physician, 2012. **58**(11): p. 1236-9.  
51  
52  
53  
54  
55  
56  
57  
58  
59  
60

- 1  
2  
3 456 44. Schofield, W.N., *Predicting basal metabolic rate, new standards and review of*  
4 457 *previous work*. Hum Nutr Clin Nutr, 1985. **39 Suppl 1**: p. 5-41.
- 5  
6 458 45. Food Standards Agency, *FSA nutrient and food based guidelines for UK institutions*.  
7 459 *Available at:*  
8  
9 460 <http://www.food.gov.uk/sites/default/files/multimedia/pdfs/nutrientinstitution.pdf>  
10 461 *(accessed 18 Jan 2016)*. 2007.
- 11  
12 462 46. Atkinson, F.S., K. Foster-Powell, and J.C. Brand-Miller, *International tables of*  
13 463 *glycemic index and glycemic load values: 2008*. Diabetes Care, 2008. **31**(12): p.  
14 464 2281-3.
- 15  
16 465 47. Wolever, T.M. and D.J. Jenkins, *The use of the glycemic index in predicting the blood*  
17 466 *glucose response to mixed meals*. Am J Clin Nutr, 1986. **43**(1): p. 167-72.
- 18  
19 467 48. Kendzierski, D. and K. DeCarlo, *Physical activity enjoyment scale: two validation*  
20 468 *studies*. J Sport Ex Psych, 1991. **13**: p. 50-64.
- 21  
22 469 49. Svensson, E., *Comparison of the Quality of Assessments Using Continuous and*  
23 470 *Discrete Ordinal Rating Scales*. Biom J, 2000. **42**(4): p. 417-434.
- 24  
25 471 50. Michie, S., et al., *A refined taxonomy of behaviour change techniques to help people*  
26 472 *change their physical activity and healthy eating behaviours: the CALO-RE*  
27 473 *taxonomy*. Psychol Health, 2011. **26**(11): p. 1479-98.
- 28  
29 474 51. Francis, J., et al., *Constructing questionnaires based on the theory of planned*  
30 475 *behaviour: A manual for health services researchers*. Newcastle upon Tyne, UK:  
31 476 *Centre for Health Services Research, University of Newcastle upon Tyne*. 2004.
- 32  
33 477 52. Schwarzer, R. and B. Renner, *Social-cognitive predictors of health behavior: action*  
34 478 *self-efficacy and coping self-efficacy*. Health Psychol, 2000. **19**(5): p. 487-95.
- 35  
36 479 53. Thompson, E.R., *Development and Validation of an Internationally Reliable Short-*  
37 480 *Form of the Positive and Negative Affect Schedule (PANAS)*. Journal of Cross-  
38 481 *Cultural Psychology*, 2007. **38**(2): p. 227-242.
- 39  
40 482 54. Tinkler, L. *Measuring National Well-being: Personal Well-being in the UK, 2014 to*  
41 483 *2015*. 2015; Available from:  
42  
43 484 <https://www.ons.gov.uk/peoplepopulationandcommunity/wellbeing/bulletins/measuring-nationalwellbeing/2015-09-23>.  
44 485
- 45  
46 486 55. Tennant, R., et al., *The Warwick-Edinburgh Mental Well-being Scale (WEMWBS):*  
47 487 *development and UK validation*. Health and Quality of Life Outcomes, 2007. **5**(1): p.  
48 488 63.
- 49  
50 489 56. Yeung, R.R., *The acute effects of exercise on mood state*. J Psychosom Res, 1996.  
51 490 **40**(2): p. 123-41.
- 52  
53 491 57. Faul, F., et al., *G\*Power 3: a flexible statistical power analysis program for the social,*  
54 492 *behavioral, and biomedical sciences*. Behav Res Methods, 2007. **39**(2): p. 175-91.

1  
2  
3  
4  
5  
6  
7  
8  
9  
10  
11  
12  
13  
14  
15  
16  
17  
18  
19  
20  
21  
22  
23  
24  
25  
26  
27  
28  
29  
30  
31  
32  
33  
34  
35  
36  
37  
38  
39  
40  
41  
42  
43  
44  
45  
46  
47  
48  
49  
50  
51  
52  
53  
54  
55  
56  
57  
58  
59  
60

493 58. Cohen, J., *Statistical power analysis for the behavioral sciences*. 2nd ed. 1988,  
494 Hillsdale, NJ: Erlbaum.  
495

For peer review only



1  
2  
3 **Figure captions**  
4

5 **Figure 1** Study schedule.  
6

7  
8 **Figure 2** Schematic of experimental protocol.  
9  
10  
11  
12  
13  
14  
15  
16  
17  
18  
19  
20  
21  
22  
23  
24  
25  
26  
27  
28  
29  
30  
31  
32  
33  
34  
35  
36  
37  
38  
39  
40  
41  
42  
43  
44  
45  
46  
47  
48  
49  
50  
51  
52  
53  
54  
55  
56  
57  
58  
59  
60

For peer review only

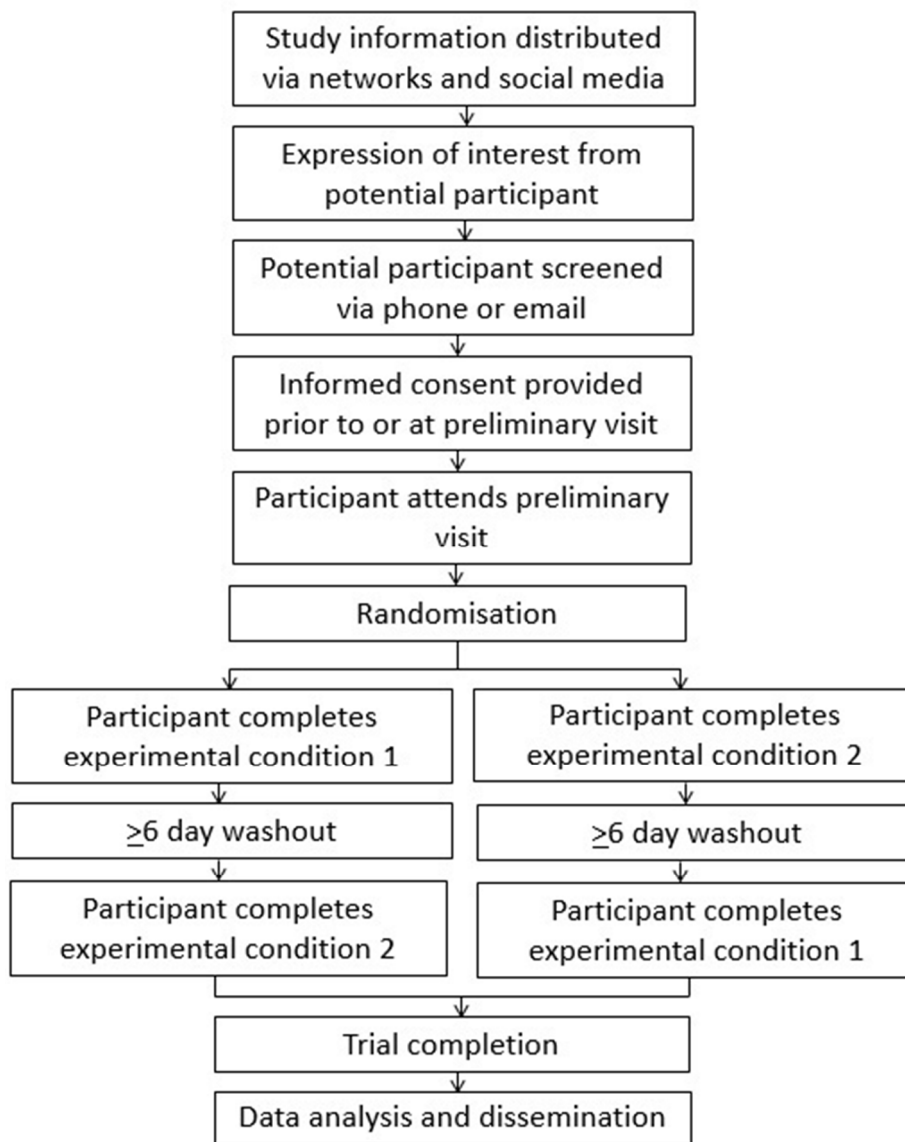

Figure 1 Study schedule.

43x56mm (300 x 300 DPI)

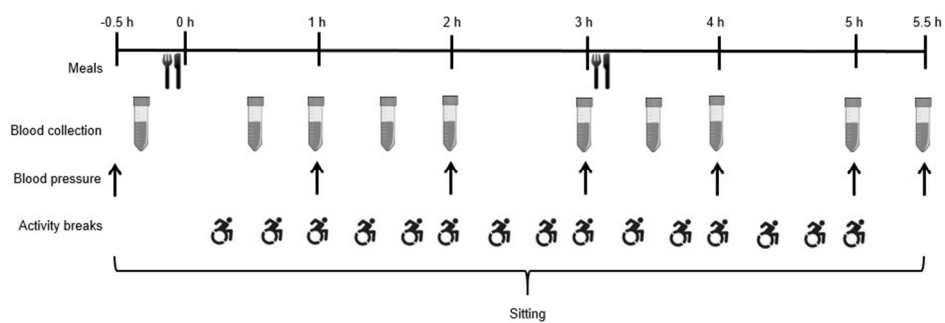

Figure 2 Schematic of experimental protocol.

85x30mm (300 x 300 DPI)

peer review only

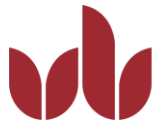University of  
Bedfordshire

Version 2 (14/03/2017)

Participant Identification Number for this trial:\_\_\_\_

## CONSENT FORM

Title of Project: The Spinal Cord Injury Move More (SCIMM) study: The benefits of breaking up prolonged sedentary time on cardiovascular disease risk markers in people with spinal cord injury

Please initial box

1. I confirm that I have read and understand the information sheet dated [07/08/2017] (version 9) for the above study. I have had the opportunity to consider the information, ask questions and have had these answered satisfactorily.
2. I understand that my participation is voluntary and that I am free to withdraw at any time without giving any reason, without my medical care or legal rights being affected.
3. I understand that relevant sections of my data collected during the study may be looked at by individuals from the University of Bedfordshire or from regulatory authorities, where it is relevant to my taking part in this research. I give permission for these individuals to have access to my records.
4. In the event that the results from the DXA bone scan show that I have low bone mineral density I agree to being notified of this in a letter that will advise me to contact my GP for further investigation about the results.
5. I agree to my GP being notified of my taking part in this study.
6. I agree to take part in the above study.

\_\_\_\_\_  
Name of Participant

\_\_\_\_\_  
Date

\_\_\_\_\_  
Signature

\_\_\_\_\_  
Email

\_\_\_\_\_  
Mobile

\_\_\_\_\_  
GP Name

\_\_\_\_\_  
GP Address

\_\_\_\_\_  
Researcher

\_\_\_\_\_  
Date

\_\_\_\_\_  
Signature

**Please return this form to:** Thomas Withers, Institute for Sport and Physical Activity Research, University of Bedfordshire, Polhill Avenue, Bedford, MK41 9EA.

Email: [thomas.withers@beds.ac.uk](mailto:thomas.withers@beds.ac.uk)

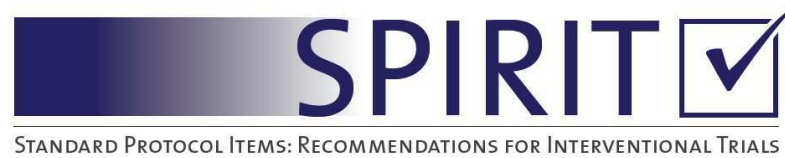

SPIRIT 2013 Checklist: Recommended items to address in a clinical trial protocol and related documents\*

| Section/item                      | Item No | Description                                                                                                                                                                                                                                                                              | Addressed on page number |
|-----------------------------------|---------|------------------------------------------------------------------------------------------------------------------------------------------------------------------------------------------------------------------------------------------------------------------------------------------|--------------------------|
| <b>Administrative information</b> |         |                                                                                                                                                                                                                                                                                          |                          |
| Title                             | 1       | Descriptive title identifying the study design, population, interventions, and, if applicable, trial acronym                                                                                                                                                                             | ___ 1 ___                |
| Trial registration                | 2a      | Trial identifier and registry name. If not yet registered, name of intended registry                                                                                                                                                                                                     | ___ 2 ___                |
|                                   | 2b      | All items from the World Health Organization Trial Registration Data Set                                                                                                                                                                                                                 | ___ 2 ___                |
| Protocol version                  | 3       | Date and version identifier                                                                                                                                                                                                                                                              | ___ NA ___               |
| Funding                           | 4       | Sources and types of financial, material, and other support                                                                                                                                                                                                                              | ___ 1 ___                |
| Roles and responsibilities        | 5a      | Names, affiliations, and roles of protocol contributors                                                                                                                                                                                                                                  | ___ 14 ___               |
|                                   | 5b      | Name and contact information for the trial sponsor                                                                                                                                                                                                                                       | ___ NA ___               |
|                                   | 5c      | Role of study sponsor and funders, if any, in study design; collection, management, analysis, and interpretation of data; writing of the report; and the decision to submit the report for publication, including whether they will have ultimate authority over any of these activities | ___ 14 ___               |
|                                   | 5d      | Composition, roles, and responsibilities of the coordinating centre, steering committee, endpoint adjudication committee, data management team, and other individuals or groups overseeing the trial, if applicable (see Item 21a for data monitoring committee)                         | ___ NA ___               |

1  
2  
3  
4  
5  
6  
7  
8  
9  
10  
11  
12  
13  
14  
15  
16  
17  
18  
19  
20  
21  
22  
23  
24  
25  
26  
27  
28  
29  
30  
31  
32  
33  
34  
35  
36  
37  
38  
39  
40  
41  
42  
43  
44  
45  
46  
47**Introduction**

|                          |    |                                                                                                                                                                                                           |     |
|--------------------------|----|-----------------------------------------------------------------------------------------------------------------------------------------------------------------------------------------------------------|-----|
| Background and rationale | 6a | Description of research question and justification for undertaking the trial, including summary of relevant studies (published and unpublished) examining benefits and harms for each intervention        | 4-6 |
|                          | 6b | Explanation for choice of comparators                                                                                                                                                                     | NA  |
| Objectives               | 7  | Specific objectives or hypotheses                                                                                                                                                                         | 5   |
| Trial design             | 8  | Description of trial design including type of trial (eg, parallel group, crossover, factorial, single group), allocation ratio, and framework (eg, superiority, equivalence, noninferiority, exploratory) | 6   |

**Methods: Participants, interventions, and outcomes**

|                      |     |                                                                                                                                                                                                                                                                                                                                                                                |      |
|----------------------|-----|--------------------------------------------------------------------------------------------------------------------------------------------------------------------------------------------------------------------------------------------------------------------------------------------------------------------------------------------------------------------------------|------|
| Study setting        | 9   | Description of study settings (eg, community clinic, academic hospital) and list of countries where data will be collected. Reference to where list of study sites can be obtained                                                                                                                                                                                             | 6    |
| Eligibility criteria | 10  | Inclusion and exclusion criteria for participants. If applicable, eligibility criteria for study centres and individuals who will perform the interventions (eg, surgeons, psychotherapists)                                                                                                                                                                                   | 6-7  |
| Interventions        | 11a | Interventions for each group with sufficient detail to allow replication, including how and when they will be administered                                                                                                                                                                                                                                                     | 9    |
|                      | 11b | Criteria for discontinuing or modifying allocated interventions for a given trial participant (eg, drug dose change in response to harms, participant request, or improving/worsening disease)                                                                                                                                                                                 | NA   |
|                      | 11c | Strategies to improve adherence to intervention protocols, and any procedures for monitoring adherence (eg, drug tablet return, laboratory tests)                                                                                                                                                                                                                              | NA   |
|                      | 11d | Relevant concomitant care and interventions that are permitted or prohibited during the trial                                                                                                                                                                                                                                                                                  | NA   |
| Outcomes             | 12  | Primary, secondary, and other outcomes, including the specific measurement variable (eg, systolic blood pressure), analysis metric (eg, change from baseline, final value, time to event), method of aggregation (eg, median, proportion), and time point for each outcome. Explanation of the clinical relevance of chosen efficacy and harm outcomes is strongly recommended | 12   |
| Participant timeline | 13  | Time schedule of enrolment, interventions (including any run-ins and washouts), assessments, and visits for participants. A schematic diagram is highly recommended (see Figure)                                                                                                                                                                                               | 7-10 |

|   |             |    |                                                                                                                                                                                       |              |
|---|-------------|----|---------------------------------------------------------------------------------------------------------------------------------------------------------------------------------------|--------------|
| 1 |             |    |                                                                                                                                                                                       |              |
| 2 |             |    |                                                                                                                                                                                       |              |
| 3 | Sample size | 14 | Estimated number of participants needed to achieve study objectives and how it was determined, including clinical and statistical assumptions supporting any sample size calculations | _____13_____ |
| 4 |             |    |                                                                                                                                                                                       |              |
| 5 | Recruitment | 15 | Strategies for achieving adequate participant enrolment to reach target sample size                                                                                                   | _____7_____  |
| 6 |             |    |                                                                                                                                                                                       |              |
| 7 |             |    |                                                                                                                                                                                       |              |

### 8 **Methods: Assignment of interventions (for controlled trials)**

#### 9 Allocation:

|    |                                  |     |                                                                                                                                                                                                                                                                                                                                                          |              |
|----|----------------------------------|-----|----------------------------------------------------------------------------------------------------------------------------------------------------------------------------------------------------------------------------------------------------------------------------------------------------------------------------------------------------------|--------------|
| 10 |                                  |     |                                                                                                                                                                                                                                                                                                                                                          |              |
| 11 |                                  |     |                                                                                                                                                                                                                                                                                                                                                          |              |
| 12 | Sequence generation              | 16a | Method of generating the allocation sequence (eg, computer-generated random numbers), and list of any factors for stratification. To reduce predictability of a random sequence, details of any planned restriction (eg, blocking) should be provided in a separate document that is unavailable to those who enrol participants or assign interventions | _____6_____  |
| 13 |                                  |     |                                                                                                                                                                                                                                                                                                                                                          |              |
| 14 |                                  |     |                                                                                                                                                                                                                                                                                                                                                          |              |
| 15 |                                  |     |                                                                                                                                                                                                                                                                                                                                                          |              |
| 16 |                                  |     |                                                                                                                                                                                                                                                                                                                                                          |              |
| 17 | Allocation concealment mechanism | 16b | Mechanism of implementing the allocation sequence (eg, central telephone; sequentially numbered, opaque, sealed envelopes), describing any steps to conceal the sequence until interventions are assigned                                                                                                                                                | _____6_____  |
| 18 |                                  |     |                                                                                                                                                                                                                                                                                                                                                          |              |
| 19 |                                  |     |                                                                                                                                                                                                                                                                                                                                                          |              |
| 20 |                                  |     |                                                                                                                                                                                                                                                                                                                                                          |              |
| 21 | Implementation                   | 16c | Who will generate the allocation sequence, who will enrol participants, and who will assign participants to interventions                                                                                                                                                                                                                                | _____6_____  |
| 22 |                                  |     |                                                                                                                                                                                                                                                                                                                                                          |              |
| 23 |                                  |     |                                                                                                                                                                                                                                                                                                                                                          |              |
| 24 | Blinding (masking)               | 17a | Who will be blinded after assignment to interventions (eg, trial participants, care providers, outcome assessors, data analysts), and how                                                                                                                                                                                                                | _____NA_____ |
| 25 |                                  |     |                                                                                                                                                                                                                                                                                                                                                          |              |
| 26 |                                  |     |                                                                                                                                                                                                                                                                                                                                                          |              |
| 27 |                                  | 17b | If blinded, circumstances under which unblinding is permissible, and procedure for revealing a participant's allocated intervention during the trial                                                                                                                                                                                                     | _____NA_____ |
| 28 |                                  |     |                                                                                                                                                                                                                                                                                                                                                          |              |
| 29 |                                  |     |                                                                                                                                                                                                                                                                                                                                                          |              |
| 30 |                                  |     |                                                                                                                                                                                                                                                                                                                                                          |              |

### 31 **Methods: Data collection, management, and analysis**

|    |                         |     |                                                                                                                                                                                                                                                                                                                                                                                                              |                |
|----|-------------------------|-----|--------------------------------------------------------------------------------------------------------------------------------------------------------------------------------------------------------------------------------------------------------------------------------------------------------------------------------------------------------------------------------------------------------------|----------------|
| 32 |                         |     |                                                                                                                                                                                                                                                                                                                                                                                                              |                |
| 33 | Data collection methods | 18a | Plans for assessment and collection of outcome, baseline, and other trial data, including any related processes to promote data quality (eg, duplicate measurements, training of assessors) and a description of study instruments (eg, questionnaires, laboratory tests) along with their reliability and validity, if known. Reference to where data collection forms can be found, if not in the protocol | _____8-12_____ |
| 34 |                         |     |                                                                                                                                                                                                                                                                                                                                                                                                              |                |
| 35 |                         |     |                                                                                                                                                                                                                                                                                                                                                                                                              |                |
| 36 |                         |     |                                                                                                                                                                                                                                                                                                                                                                                                              |                |
| 37 |                         |     |                                                                                                                                                                                                                                                                                                                                                                                                              |                |
| 38 |                         | 18b | Plans to promote participant retention and complete follow-up, including list of any outcome data to be collected for participants who discontinue or deviate from intervention protocols                                                                                                                                                                                                                    | _____7_____    |
| 39 |                         |     |                                                                                                                                                                                                                                                                                                                                                                                                              |                |
| 40 |                         |     |                                                                                                                                                                                                                                                                                                                                                                                                              |                |
| 41 |                         |     |                                                                                                                                                                                                                                                                                                                                                                                                              |                |
| 42 |                         |     |                                                                                                                                                                                                                                                                                                                                                                                                              |                |
| 43 |                         |     |                                                                                                                                                                                                                                                                                                                                                                                                              |                |
| 44 |                         |     |                                                                                                                                                                                                                                                                                                                                                                                                              |                |
| 45 |                         |     |                                                                                                                                                                                                                                                                                                                                                                                                              |                |
| 46 |                         |     |                                                                                                                                                                                                                                                                                                                                                                                                              |                |
| 47 |                         |     |                                                                                                                                                                                                                                                                                                                                                                                                              |                |

|    |                                 |     |                                                                                                                                                                                                                                                                                                                                       |                |
|----|---------------------------------|-----|---------------------------------------------------------------------------------------------------------------------------------------------------------------------------------------------------------------------------------------------------------------------------------------------------------------------------------------|----------------|
| 1  |                                 |     |                                                                                                                                                                                                                                                                                                                                       |                |
| 2  |                                 |     |                                                                                                                                                                                                                                                                                                                                       |                |
| 3  | Data management                 | 19  | Plans for data entry, coding, security, and storage, including any related processes to promote data quality (eg, double data entry; range checks for data values). Reference to where details of data management procedures can be found, if not in the protocol                                                                     | _____ 14 _____ |
| 4  |                                 |     |                                                                                                                                                                                                                                                                                                                                       |                |
| 5  |                                 |     |                                                                                                                                                                                                                                                                                                                                       |                |
| 6  |                                 |     |                                                                                                                                                                                                                                                                                                                                       |                |
| 7  | Statistical methods             | 20a | Statistical methods for analysing primary and secondary outcomes. Reference to where other details of the statistical analysis plan can be found, if not in the protocol                                                                                                                                                              | _____ 13 _____ |
| 8  |                                 |     |                                                                                                                                                                                                                                                                                                                                       |                |
| 9  |                                 |     |                                                                                                                                                                                                                                                                                                                                       |                |
| 10 |                                 | 20b | Methods for any additional analyses (eg, subgroup and adjusted analyses)                                                                                                                                                                                                                                                              | _____ 13 _____ |
| 11 |                                 |     |                                                                                                                                                                                                                                                                                                                                       |                |
| 12 |                                 | 20c | Definition of analysis population relating to protocol non-adherence (eg, as randomised analysis), and any statistical methods to handle missing data (eg, multiple imputation)                                                                                                                                                       | _____ NA _____ |
| 13 |                                 |     |                                                                                                                                                                                                                                                                                                                                       |                |
| 14 |                                 |     |                                                                                                                                                                                                                                                                                                                                       |                |
| 15 | <b>Methods: Monitoring</b>      |     |                                                                                                                                                                                                                                                                                                                                       |                |
| 16 |                                 |     |                                                                                                                                                                                                                                                                                                                                       |                |
| 17 | Data monitoring                 | 21a | Composition of data monitoring committee (DMC); summary of its role and reporting structure; statement of whether it is independent from the sponsor and competing interests; and reference to where further details about its charter can be found, if not in the protocol. Alternatively, an explanation of why a DMC is not needed | _____ NA _____ |
| 18 |                                 |     |                                                                                                                                                                                                                                                                                                                                       |                |
| 19 |                                 |     |                                                                                                                                                                                                                                                                                                                                       |                |
| 20 |                                 |     |                                                                                                                                                                                                                                                                                                                                       |                |
| 21 |                                 |     |                                                                                                                                                                                                                                                                                                                                       |                |
| 22 |                                 | 21b | Description of any interim analyses and stopping guidelines, including who will have access to these interim results and make the final decision to terminate the trial                                                                                                                                                               | _____ NA _____ |
| 23 |                                 |     |                                                                                                                                                                                                                                                                                                                                       |                |
| 24 |                                 |     |                                                                                                                                                                                                                                                                                                                                       |                |
| 25 | Harms                           | 22  | Plans for collecting, assessing, reporting, and managing solicited and spontaneously reported adverse events and other unintended effects of trial interventions or trial conduct                                                                                                                                                     | _____ NA _____ |
| 26 |                                 |     |                                                                                                                                                                                                                                                                                                                                       |                |
| 27 |                                 |     |                                                                                                                                                                                                                                                                                                                                       |                |
| 28 | Auditing                        | 23  | Frequency and procedures for auditing trial conduct, if any, and whether the process will be independent from investigators and the sponsor                                                                                                                                                                                           | _____ NA _____ |
| 29 |                                 |     |                                                                                                                                                                                                                                                                                                                                       |                |
| 30 |                                 |     |                                                                                                                                                                                                                                                                                                                                       |                |
| 31 |                                 |     |                                                                                                                                                                                                                                                                                                                                       |                |
| 32 | <b>Ethics and dissemination</b> |     |                                                                                                                                                                                                                                                                                                                                       |                |
| 33 |                                 |     |                                                                                                                                                                                                                                                                                                                                       |                |
| 34 | Research ethics approval        | 24  | Plans for seeking research ethics committee/institutional review board (REC/IRB) approval                                                                                                                                                                                                                                             | _____ 14 _____ |
| 35 |                                 |     |                                                                                                                                                                                                                                                                                                                                       |                |
| 36 |                                 |     |                                                                                                                                                                                                                                                                                                                                       |                |
| 37 | Protocol amendments             | 25  | Plans for communicating important protocol modifications (eg, changes to eligibility criteria, outcomes, analyses) to relevant parties (eg, investigators, REC/IRBs, trial participants, trial registries, journals, regulators)                                                                                                      | _____ 14 _____ |
| 38 |                                 |     |                                                                                                                                                                                                                                                                                                                                       |                |
| 39 |                                 |     |                                                                                                                                                                                                                                                                                                                                       |                |
| 40 |                                 |     |                                                                                                                                                                                                                                                                                                                                       |                |
| 41 |                                 |     |                                                                                                                                                                                                                                                                                                                                       |                |
| 42 |                                 |     |                                                                                                                                                                                                                                                                                                                                       |                |
| 43 |                                 |     |                                                                                                                                                                                                                                                                                                                                       |                |
| 44 |                                 |     |                                                                                                                                                                                                                                                                                                                                       |                |
| 45 |                                 |     |                                                                                                                                                                                                                                                                                                                                       |                |
| 46 |                                 |     |                                                                                                                                                                                                                                                                                                                                       |                |
| 47 |                                 |     |                                                                                                                                                                                                                                                                                                                                       |                |



|    |                               |     |                                                                                                                                                                                                                                                                                     |                        |
|----|-------------------------------|-----|-------------------------------------------------------------------------------------------------------------------------------------------------------------------------------------------------------------------------------------------------------------------------------------|------------------------|
| 1  |                               |     |                                                                                                                                                                                                                                                                                     |                        |
| 2  |                               |     |                                                                                                                                                                                                                                                                                     |                        |
| 3  | Consent or assent             | 26a | Who will obtain informed consent or assent from potential trial participants or authorised surrogates, and how (see Item 32)                                                                                                                                                        | _____7_____            |
| 4  |                               |     |                                                                                                                                                                                                                                                                                     |                        |
| 5  |                               |     |                                                                                                                                                                                                                                                                                     |                        |
| 6  |                               | 26b | Additional consent provisions for collection and use of participant data and biological specimens in ancillary studies, if applicable                                                                                                                                               | _____NA_____           |
| 7  |                               |     |                                                                                                                                                                                                                                                                                     |                        |
| 8  | Confidentiality               | 27  | How personal information about potential and enrolled participants will be collected, shared, and maintained in order to protect confidentiality before, during, and after the trial                                                                                                | _____14_____           |
| 9  |                               |     |                                                                                                                                                                                                                                                                                     |                        |
| 10 |                               |     |                                                                                                                                                                                                                                                                                     |                        |
| 11 | Declaration of interests      | 28  | Financial and other competing interests for principal investigators for the overall trial and each study site                                                                                                                                                                       | _____15_____           |
| 12 |                               |     |                                                                                                                                                                                                                                                                                     |                        |
| 13 |                               |     |                                                                                                                                                                                                                                                                                     |                        |
| 14 | Access to data                | 29  | Statement of who will have access to the final trial dataset, and disclosure of contractual agreements that limit such access for investigators                                                                                                                                     | _____14_____           |
| 15 |                               |     |                                                                                                                                                                                                                                                                                     |                        |
| 16 |                               |     |                                                                                                                                                                                                                                                                                     |                        |
| 17 | Ancillary and post-trial care | 30  | Provisions, if any, for ancillary and post-trial care, and for compensation to those who suffer harm from trial participation                                                                                                                                                       | _____NA_____           |
| 18 |                               |     |                                                                                                                                                                                                                                                                                     |                        |
| 19 |                               |     |                                                                                                                                                                                                                                                                                     |                        |
| 20 | Dissemination policy          | 31a | Plans for investigators and sponsor to communicate trial results to participants, healthcare professionals, the public, and other relevant groups (eg, via publication, reporting in results databases, or other data sharing arrangements), including any publication restrictions | _____14_____           |
| 21 |                               |     |                                                                                                                                                                                                                                                                                     |                        |
| 22 |                               |     |                                                                                                                                                                                                                                                                                     |                        |
| 23 |                               |     |                                                                                                                                                                                                                                                                                     |                        |
| 24 |                               |     |                                                                                                                                                                                                                                                                                     |                        |
| 25 |                               | 31b | Authorship eligibility guidelines and any intended use of professional writers                                                                                                                                                                                                      | _____NA_____           |
| 26 |                               |     |                                                                                                                                                                                                                                                                                     |                        |
| 27 |                               | 31c | Plans, if any, for granting public access to the full protocol, participant-level dataset, and statistical code                                                                                                                                                                     | _____14_____           |
| 28 |                               |     |                                                                                                                                                                                                                                                                                     |                        |
| 29 | <b>Appendices</b>             |     |                                                                                                                                                                                                                                                                                     |                        |
| 30 |                               |     |                                                                                                                                                                                                                                                                                     |                        |
| 31 | Informed consent materials    | 32  | Model consent form and other related documentation given to participants and authorised surrogates                                                                                                                                                                                  | Supplementary material |
| 32 |                               |     |                                                                                                                                                                                                                                                                                     |                        |
| 33 |                               |     |                                                                                                                                                                                                                                                                                     |                        |
| 34 | Biological specimens          | 33  | Plans for collection, laboratory evaluation, and storage of biological specimens for genetic or molecular analysis in the current trial and for future use in ancillary studies, if applicable                                                                                      | _____N/A_____          |
| 35 |                               |     |                                                                                                                                                                                                                                                                                     |                        |
| 36 |                               |     |                                                                                                                                                                                                                                                                                     |                        |

37 \*It is strongly recommended that this checklist be read in conjunction with the SPIRIT 2013 Explanation & Elaboration for important clarification on the items.  
 38 Amendments to the protocol should be tracked and dated. The SPIRIT checklist is copyrighted by the SPIRIT Group under the Creative Commons  
 39 "[Attribution-NonCommercial-NoDerivs 3.0 Unported](https://creativecommons.org/licenses/by-nc-nd/3.0/)" license.  
 40

# BMJ Open

## Cardiovascular disease risk marker responses to breaking up prolonged sedentary time in individuals with paraplegia: the Spinal Cord Injury Move More (SCIMM) randomised crossover laboratory trial protocol

|                                 |                                                                                                                                                                                                                                                                                                                                                                                                                                                                                                                                                                                                                                                                                                                                                                                                                                                                                                       |
|---------------------------------|-------------------------------------------------------------------------------------------------------------------------------------------------------------------------------------------------------------------------------------------------------------------------------------------------------------------------------------------------------------------------------------------------------------------------------------------------------------------------------------------------------------------------------------------------------------------------------------------------------------------------------------------------------------------------------------------------------------------------------------------------------------------------------------------------------------------------------------------------------------------------------------------------------|
| Journal:                        | <i>BMJ Open</i>                                                                                                                                                                                                                                                                                                                                                                                                                                                                                                                                                                                                                                                                                                                                                                                                                                                                                       |
| Manuscript ID                   | bmjopen-2018-021936.R2                                                                                                                                                                                                                                                                                                                                                                                                                                                                                                                                                                                                                                                                                                                                                                                                                                                                                |
| Article Type:                   | Protocol                                                                                                                                                                                                                                                                                                                                                                                                                                                                                                                                                                                                                                                                                                                                                                                                                                                                                              |
| Date Submitted by the Author:   | 16-May-2018                                                                                                                                                                                                                                                                                                                                                                                                                                                                                                                                                                                                                                                                                                                                                                                                                                                                                           |
| Complete List of Authors:       | Withers, Thomas; University of Bedfordshire, Institute for Sport Science and Physical Activity Research, School of Sport Science and Physical Activity<br>Croft, Louise; University of Bedfordshire, Institute for Sport Science and Physical Activity Research, School of Sport Science and Physical Activity<br>Goosey-Tolfrey, Victoria L; Loughborough University, School of Sport, Exercise and Health Sciences, The Peter Harrison Centre for Disability Sport<br>Dunstan, David; Baker Heart and Diabetes Institute; Australian Catholic University, Mary MacKillop Institute for Health Research<br>Leicht, Christof; Loughborough University, School of Sport, Exercise and Health Sciences, The Peter Harrison Centre for Disability Sport<br>Bailey, Daniel; University of Bedfordshire, Institute for Sport and Physical Activity Research, School of Sport Science and Physical Activity |
| <b>Primary Subject Heading</b>: | Sports and exercise medicine                                                                                                                                                                                                                                                                                                                                                                                                                                                                                                                                                                                                                                                                                                                                                                                                                                                                          |
| Secondary Subject Heading:      | Public health                                                                                                                                                                                                                                                                                                                                                                                                                                                                                                                                                                                                                                                                                                                                                                                                                                                                                         |
| Keywords:                       | physical activity, sedentary lifestyle, activity breaks, glucose, cardiovascular disease, spinal cord injury                                                                                                                                                                                                                                                                                                                                                                                                                                                                                                                                                                                                                                                                                                                                                                                          |
|                                 |                                                                                                                                                                                                                                                                                                                                                                                                                                                                                                                                                                                                                                                                                                                                                                                                                                                                                                       |

SCHOLARONE™  
Manuscripts

1  
2  
3 **Cardiovascular disease risk marker responses to breaking up prolonged sedentary**  
4 **time in individuals with paraplegia: the Spinal Cord Injury Move More (SCIMM)**  
5 **randomised crossover laboratory trial protocol**  
6  
7  
8  
9

10 **Authors**

11  
12 T. M. Withers, PhD: thomas.withers@beds.ac.uk, Institute for Sport Science and Physical  
13 Activity Research, School of Sport Science and Physical Activity, University of Bedfordshire,  
14 Polhill Avenue, Bedford, MK41 9EA, United Kingdom  
15

16  
17 L. Croft, PhD: louise.croft@beds.ac.uk, Institute for Sport Science and Physical Activity  
18 Research, School of Sport Science and Physical Activity, University of Bedfordshire, Polhill  
19 Avenue, Bedford, MK41 9EA, United Kingdom.

20  
21 V. L. Goosey-Tolfrey, PhD: V.L.Tolfrey@lboro.ac.uk, School of Sport, Exercise and Health  
22 Sciences, The Peter Harrison Centre for Disability Sport, Loughborough University, Epinal  
23 Way, LE11 3TU, United Kingdom.

24  
25 D.W. Dunstan, PhD: david.dunstan@baker.edu.au, 1<sup>st</sup> affiliation: Baker Heart and Diabetes  
26 Institute, PO Box 6492, St Kilda Road Central, Victoria 8008, Melbourne, Victoria, Australia;  
27 2<sup>nd</sup> affiliation: Mary MacKillop Institute for Health Research, Australian Catholic University,  
28 Melbourne, Victoria, Australia 3000.

29  
30 C.A. Leicht, PhD: c.a.leicht@lboro.ac.uk, School of Sport, Exercise and Health Sciences,  
31 The Peter Harrison Centre for Disability Sport, Loughborough University, Epinal Way, LE11  
32 3TU, United Kingdom.

33  
34 D.P. Bailey, PhD: daniel.bailey@beds.ac.uk, Institute for Sport Science and Physical Activity  
35 Research, School of Sport Science and Physical Activity, University of Bedfordshire, Polhill  
36 Avenue, Bedford, MK41 9EA, United Kingdom.  
37

38 **Corresponding author**

39  
40 D.P. Bailey, PhD: daniel.bailey@beds.ac.uk, Institute for Sport Science and Physical Activity  
41 Research, University of Bedfordshire, Polhill Avenue, Bedford, MK41 9EA  
42

43 **Word count:** 3531

44  
45 **Sources of funding:** This work is supported by Heart Research UK grant number  
46 RG2655/17/18.  
47

48 **Conflicts of interest:** None of the authors have declared any conflicts of interest.  
49

50 **Study start date:** 19<sup>th</sup> May 2017

51 **Study end date:** 18<sup>th</sup> January 2019  
52  
53  
54  
55  
56  
57  
58  
59  
60

## 1 **Abstract**

2 **Introduction:** Sedentary behaviour is a distinct risk factor for cardiovascular disease (CVD)  
3 and could partly explain the increased prevalence of CVD in people with spinal cord injury  
4 (SCI). Interrupting prolonged sitting periods with regular short bouts of walking acutely  
5 suppresses postprandial glucose and lipids in able-bodied individuals. However, the acute  
6 CVD risk marker response to breaking up prolonged sedentary time in people with SCI has  
7 not been investigated. **Methods and analysis:** A randomised two-condition laboratory  
8 crossover trial will compare: 1) breaking up prolonged sedentary time with 2 min moderate-  
9 intensity arm crank activity every 20 min, with 2) uninterrupted prolonged sedentary time  
10 (control) in people with SCI. Outcomes will include acute effects on postprandial glucose,  
11 insulin, lipids and blood pressure. Blood samples will be collected and blood pressure  
12 measured at regular intervals during each 5.5 h condition. **Ethics and dissemination:** This  
13 study was approved by the Cambridge South NHS Research Ethics Committee. This  
14 research will help determine if breaking up prolonged sedentary time could be effective in  
15 lowering CVD risk in people with SCI. The findings of the research will be published in a peer  
16 review journal and disseminated to relevant user groups. **Trial registration:** The study is  
17 registered as a clinical trial on the ISRCTN register (trial ID: ISRCTN51868437).

## 19 **Strengths and limitations of this study**

- 20 • This study uses a randomised crossover design to investigate, for the first time,  
21 cardiovascular disease risk marker responses to breaking up prolonged sedentary  
22 time in individuals with paraplegia.
- 23 • Regular collection of blood samples will permit robust time course and incremental  
24 area under the curve calculations for primary and secondary outcomes.
- 25 • Due to the acute nature of the study, the long-term cardiovascular disease risk  
26 marker responses to a chronic intervention will remain unknown.

1  
2  
3  
4  
5  
6  
7  
8  
9  
10  
11  
12  
13  
14  
15  
16  
17  
18  
19  
20  
21  
22  
23  
24  
25  
26  
27  
28  
29  
30  
31  
32  
33  
34  
35  
36  
37  
38  
39  
40  
41  
42  
43  
44  
45  
46  
47  
48  
49  
50  
51  
52  
53  
54  
55  
56  
57  
58  
59  
60

27 • The cardiovascular disease risk marker responses to breaking up prolonged  
28 sedentary time in people with tetraplegia still requires investigation.

29  
30 **Keywords:** physical activity; sedentary lifestyle; activity breaks; glucose; cardiovascular  
31 disease; spinal cord injury

For peer review only

## 32 Introduction

33 There is a global incident rate of 180,000 traumatic spinal cord injury (SCI) cases each year  
34 with a prevalence of over 40,000 in the UK [1, 2]. Cardiovascular disease (CVD) is a leading  
35 cause of death in individuals with SCI [3] and this population have a significantly increased  
36 risk of heart disease and stroke compared with able-bodied individuals [4]. Traditional risk  
37 factors for CVD include impaired glucose tolerance, central obesity, high triglycerides, low  
38 high-density lipoprotein cholesterol (HDL), and high blood pressure. These risk factors often  
39 exacerbate significantly as a consequence of SCI [5] and a plethora of research has  
40 documented impaired glucose tolerance and adverse lipid profiles in individuals with SCI [5,  
41 6]. The clustering of  $\geq 2$  and  $\geq 3$  risk factors is prevalent in 87% and 72% of SCI individuals,  
42 respectively [7], which is markedly higher compared with the able-bodied population [8]. This  
43 milieu of metabolic disturbances after SCI may be due to increases in body fat resulting from  
44 an imbalance in energy intake and expenditure [5]. Excess fat accumulation, particularly in  
45 the visceral region, is associated with inflammation that is causal in glucose intolerance and  
46 dyslipidaemia [5, 9] thus promoting atherogenesis that would increase the risk of CVD in this  
47 population [10].

48  
49 Postprandial glucose and lipid concentrations are strong independent predictors of future  
50 CVD incidence, even in those without diabetes [11]. There is a dose-response relationship  
51 between postprandial glucose area under the curve (AUC) and CVD risk, while progression  
52 of carotid atherosclerosis can be prevented by attenuation of postprandial glucose  
53 concentrations [12, 13]. Impaired postprandial glucose metabolism was observed in 50%  
54 and 62% of individuals with paraplegia and tetraplegia, respectively, compared with 18% in  
55 able-bodied individuals [6]. This impaired glucose intolerance in SCI is characterised by  
56 hyperinsulinaemia, which suggests that there is tissue level resistance to insulin [14]. In  
57 paraplegic individuals, there appears to be no difference in postprandial glucose responses  
58 between those with complete versus incomplete lesions [15, 16]. Although postprandial  
59 lipaemic responses have not been compared between individuals with complete and

1  
2  
3 60 incomplete lesions, fasting lipid levels do not differ between these groups [17]. There does,  
4  
5 61 however, appear to be an exaggerated postprandial lipaemic response in individuals with  
6  
7 62 paraplegia compared with able-bodied individuals [18]. These observations are of potential  
8  
9 63 concern as the high dietary intake of carbohydrate and fat in individuals with SCI [19] may  
10  
11 64 lead to repeated exaggerated elevations in glucose and lipids following food intake. It is thus  
12  
13 65 pertinent to identify interventions to reduce postprandial glucose and lipid responses in  
14  
15 66 individuals with SCI to reduce their CVD risk.

16  
17 67  
18 68 Physical activity guidelines have been developed specifically for this population that  
19  
20 69 recommend engaging in at least 30 min of moderate-to-vigorous physical activity (MVPA)  
21  
22 70 three times per week for CVD health benefits [20]. However, it is estimated that 37 to 50% of  
23  
24 71 this population engage in no leisure-time physical activity whatsoever [21, 22]. Reduced  
25  
26 72 levels of physical activity are proposed to largely account for the increased CVD risk in SCI  
27  
28 73 with reduced levels of leisure-time physical activity associated with increased body fat,  
29  
30 74 insulin resistance, and systolic blood pressure [22, 23]. However, sedentary behaviour (i.e.  
31  
32 75 any waking behaviour in a sitting, reclining or lying posture with low energy expenditure  
33  
34 76 [24]), is now recognised as being a significant CVD risk factor in the able-bodied population,  
35  
36 77 independent of MVPA [25]. Experimental studies in able-bodied individuals have reported an  
37  
38 78 acute reduction in postprandial glucose, insulin, triglycerides and blood pressure in response  
39  
40 79 to breaking up prolonged sedentary time with 2 min bouts of light or moderate-intensity  
41  
42 80 walking every 20 min [26-29]. However, no research has examined whether postprandial  
43  
44 81 CVD risk marker responses are attenuated in response to breaking up prolonged sedentary  
45  
46 82 time in individuals with SCI.

47  
48 83  
49  
50 84 The primary aim of this study is therefore to compare the acute CVD risk marker responses  
51  
52 85 in individuals with SCI to 1) breaking up prolonged sedentary time, with 2) uninterrupted  
53  
54 86 sedentary time. The CVD risk markers that will be studied include postprandial glucose  
55  
56 87 (primary outcome), insulin and lipids, and systolic and diastolic blood pressure (secondary

1  
2  
3 88 outcomes) based on evidence that these markers predict CVD outcomes and are adversely  
4  
5 89 affected by SCI. It is hypothesised that breaking up prolonged sedentary time will result in  
6  
7 90 favourable CVD risk marker responses compared with uninterrupted sedentary time in  
8  
9 91 individuals with paraplegia. This could identify a novel strategy for the prevention of CVD in  
10  
11 92 SCI that would warrant further evaluation.  
12  
13 93

## 14 94 **Methods and analysis**

### 15 95 *Study design*

16  
17  
18 96 A randomised two-condition crossover design will be used in accordance with the SPIRIT  
19  
20 97 statement [30]. The study is registered as a clinical trial on the ISRCTN register (trial ID:  
21  
22 98 ISRCTN51868437). The study schedule can be seen in Figure 1. All research will take place  
23  
24 99 at the University of Bedfordshire Sport and Exercise Science Laboratories. After preliminary  
25  
26 100 measures, participants will complete two experimental conditions in a randomised order. The  
27  
28 101 conditions will be separated by  $\geq 6$  days to eliminate any potential carryover effects.  
29  
30 102 Condition order will be randomised by a researcher independent from the study using  
31  
32 103 computer generated random numbers (block randomisation with balanced block sizes).  
33  
34 104

35  
36 105 Figure 1 about here.  
37  
38 106

### 39 107 *Participants*

40  
41  
42 108 *Inclusion criteria:* Males and females aged 18-60 years; chronic SCI ( $\geq 1$  year since injury);  
43  
44 109 individuals with a traumatic SCI below T5 (mid to low level paraplegia); individuals with a  
45  
46 110 non-traumatic SCI (as defined by the International Spinal Cord Injury Data Sets for non-  
47  
48 111 traumatic SCI [31]) that present with mid to low level paraplegia. Including only individuals  
49  
50 112 with injuries below T5 will ensure sympathetic innervation to the major organs at the T5 level  
51  
52 113 so that heart rate and catecholamine responses would be unaffected by injury [32] and thus  
53  
54 114 minimise the potential that innervation variations could have on the study outcomes.  
55  
56 115 Paraplegic individuals who have complete or incomplete lesions will be included based on  
57  
58  
59  
60



1  
2  
3 116 evidence that these groups do not differ with respect to postprandial glucose metabolism  
4  
5 117 (primary outcome) [15, 16]. Individuals who express an interest in taking part in the study will  
6  
7 118 be required to indicate their spinal cord lesion level and completeness of injury via a  
8  
9 119 questionnaire and asked to provide the research team with a copy of medical records to  
10  
11 120 confirm injury level and ASIA impairment scale classification prior to preliminary measures.

12  
13 121

14 122 *Exclusion criteria:* individuals who regularly engage in >300 min/week of MVPA as such high  
15  
16 123 levels of physical activity may offset the detrimental association of sedentary time with health  
17  
18 124 outcomes [33]; history of severe cardiovascular complications; hypotension (resting blood  
19  
20 125 pressure <90/60 mmHg); body mass index >45 kg/m<sup>2</sup>; a history of autonomic dysreflexia;  
21  
22 126 pregnancy; taking glucose lowering medication; smokers; diagnosed diabetes, renal failure,  
23  
24 127 liver disease, major illness, or other health issues that may limit ability to perform the  
25  
26 128 physical activity protocols.

27  
28  
29 129

### 30 130 *Recruitment*

31  
32 131 Participants will be recruited through organisations and charities relevant to individuals with  
33  
34 132 SCI, including the National Spinal Injuries Centre, Stoke Mandeville Hospital,  
35  
36 133 Buckinghamshire NHS Healthcare Trust; local sport and activity clubs; and local community  
37  
38 134 groups. Mail outs, social media, information on websites, posters, flyers, and visits from the  
39  
40 135 research team will be used to provide information on the study to potentially eligible  
41  
42 136 individuals who can then express their interest to the research team in taking part in the  
43  
44 137 study. Written informed consent will be obtained by a member of the research team prior to  
45  
46 138 participation in any testing protocols (see supplementary file). As an incentive, participants  
47  
48 139 will receive a £25 shopping gift voucher for each main condition they complete and will have  
49  
50 140 all travel expenses paid.

51  
52 141

### 53 54 142 *Preliminary measures*

1  
2  
3 143 Participants will attend a preliminary testing session where they will have body mass  
4  
5 144 measured using wheelchair double beam scales (300 series; Marsden, London, UK).  
6  
7 145 They will also have body fat and lean tissue mass (and percent) determined for the  
8  
9 146 whole body and regionally via whole-body scans using dual-energy x-ray absorptiometry  
10  
11 147 (DXA; GE Medical Systems; Chalfont St Giles, UK) in line with previous research [34-36].  
12  
13 148 During DXA measures, participants will be positioned as closely as possible to standard  
14  
15 149 protocols and Velcro restraints will be fastened around the participants' knees and ankles to  
16  
17 150 maintain correct position of the legs during scanning. Participants will be offered a wedge to  
18  
19 151 be used as a pillow for comfort. Waist circumference will be measured using International  
20  
21 152 Standards for Anthropometric Assessment (ISAK) guidelines [37, 38]. These measures will  
22  
23 153 be taken in the standing position for participants who are able to maintain this posture and in  
24  
25 154 a supine position for participants who are not able to stand [38]. Resting blood pressure will  
26  
27 155 be measured on the left arm, while seated, three times after the participant has rested for 5  
28  
29 156 min with the lowest readings being recorded. Following this, participants will be familiarised  
30  
31 157 with use of the Borg 6-20 Rating of Perceived Exertion (RPE) scale [39]. They will then cycle  
32  
33 158 using an arm ergometer (Lode Angio; Lode, Netherlands) to determine the intensity (power  
34  
35 159 output) that yields an RPE of 13 (somewhat hard) in line with previous sedentary behaviour  
36  
37 160 research [26, 40]. Participants will be asked to cycle at ~70 rpm during the test. The test will  
38  
39 161 start at a low intensity (~20 Watts) and the participants will then indicate their RPE at 1 min  
40  
41 162 intervals. The resistance will then be increased by 5-20 Watts based on the participants'  
42  
43 163 RPE until an RPE of 13 has been achieved, at which point the test will be terminated. The  
44  
45 164 test is expected to take no longer than 15 min. The intensity that corresponds to an RPE of  
46  
47 165 13 during the test will be recorded for each participant and used for the physical activity  
48  
49 166 breaks described in the respective main condition below. The use of the Borg 6-20 RPE  
50  
51 167 scale has acceptable validity in individuals with SCI to determine physical activity intensity  
52  
53 168 [41]. This method is also suggested as a practical approach for health care professionals  
54  
55  
56  
57  
58  
59  
60

1  
2  
3 169 and scientists as oxygen consumption testing equipment is costly and not available in many  
4  
5 170 rehabilitation centres and community settings [41].  
6

7 171

8  
9 172 *Experimental protocol*

10  
11 173 Figure 2 shows the experimental protocol. Participants will be instructed to refrain from  
12  
13 174 caffeine, alcohol and exercise for 48 h prior to each experimental condition. They will also be  
14  
15 175 provided with a food diary and digital weighing scales to record volume and timings of all  
16  
17 176 food and liquids consumed in the 24 h period prior to the first experimental condition.  
18  
19 177 Participants will be asked to replicate their diet the day prior to the subsequent experimental  
20  
21 178 condition [42]. On condition days, participants will attend in the morning following an  
22  
23 179 overnight fast and avoid active travel to the laboratory. Upon arrival, resting blood pressure  
24  
25 180 will be measured after 5 min rest; two measures will be taken and the lowest of these  
26  
27 181 recorded. A fasting capillary blood sample will then be collected. Participants will commence  
28  
29 182 the 5.5 h condition period following consumption of a standardised breakfast. The two  
30  
31 183 experimental conditions are as follows:

32 184

- 34 185 1. *Uninterrupted sedentary time (SED)*: participants will remain seated and inactive in their  
35  
36 186 wheelchair or a standard chair at a desk during this condition.  
37  
38 187 2. *Sedentary time interrupted with physical activity breaks (SED-ACT)*: participants will  
39  
40 188 complete 2 min of moderate-intensity arm crank activity every 20 min at ~70 rpm using  
41  
42 189 the Lode Angio arm ergometer. These 15 breaks will equate to a total of 30 min physical  
43  
44 190 activity.

45  
46 191

47  
48 192 Figure 2 about here.  
49

50 193

51  
52 194 The SED-ACT protocol was selected based on previous research that reported a significant  
53  
54 195 reduction in 5 h postprandial glucose in response to breaking up prolonged sitting time with 2  
55  
56 196 min light-intensity walking every 20 min versus uninterrupted sitting in able-bodied  
57

1  
2  
3 197 participants [28]. An RPE of 13 for the physical activity intensity was selected in line with  
4  
5 198 previous research [26, 42] and the Borg 6-20 RPE scale may be used to assess and  
6  
7 199 regulate upper-body physical activity at moderate-to-vigorous intensity in adults with chronic  
8  
9 200 SCI [41]. Moderate-intensity physical activity was selected as it is well-tolerated, can be  
10  
11 201 performed safely, and is recommended for health risk reduction in individuals with SCI [20,  
12  
13 202 43].

14  
15 203

16  
17 204 Participants will be permitted to work on a laptop computer, read, talk, or watch DVDs during  
18  
19 205 each condition. This will be standardised by asking participants to engage in the same  
20  
21 206 activities during each of the two experimental conditions. Except during the activity bouts,  
22  
23 207 participants will remain inactive and only leave their desk to void and consume standardised  
24  
25 208 meals in a kitchen adjacent to the test laboratory; participants will be aided by a member of  
26  
27 209 the research team when moving to these locations so that they remain inactive. A researcher  
28  
29 210 will be present to ensure compliance with the protocols throughout all conditions.

30  
31 211

### 32 212 *Meal and water consumption*

33  
34 213 Standardised meals will be consumed immediately prior to the start of each experimental  
35  
36 214 condition and at 3 h, each providing 30% of estimated daily energy requirements for each  
37  
38 215 participant [44]. Participants will be asked to consume each meal within a 15 min time  
39  
40 216 period. The time taken to consume the meals will be recorded for the first condition and  
41  
42 217 participants will be asked to replicate this time as closely as possible in the subsequent  
43  
44 218 condition. Breakfast will consist of bran flakes, whole milk, croissant, butter and orange juice  
45  
46 219 (55% carbohydrate, 34% fat, 12% protein) and lunch will be a chicken sandwich, salted  
47  
48 220 crisps and apple (54% carbohydrate, 34% fat, 13% protein). The macronutrient composition  
49  
50 221 of meals in the current study was selected as it is generally representative of UK guidelines  
51  
52 222 for a balanced diet [45]. The glycaemic index for these breakfast and lunch meals is 43 and  
53  
54 223 72, respectively. Glycaemic index values for each food item were obtained from the  
55  
56 224 International Tables of Glycaemic Index and Glycaemic Load Values 2008 [46] and meal

1  
2  
3 225 glycaemic index was calculated using weighted means of the glycaemic index values for the  
4  
5 226 component foods [47]. Water will be available ad libitum during the first condition and this  
6  
7 227 volume of intake will be provided at standardised regular intervals in the subsequent  
8  
9 228 condition.

10 229

11 230 *Blood collection and biochemistry*

12  
13  
14 231 Finger prick blood samples will be collected into two EDTA-containing microvettes  
15  
16 232 (Microvette CB300 EDTA, Sarstedt Ltd, Leicester, UK) at baseline and at 30, 60, 90, 120,  
17  
18 233 180, 210, 240, 300 and 330 min. Blood samples will be collected before the hourly activity  
19  
20 234 bouts in SED-ACT. At each time point, approximately 600  $\mu$ L of whole blood will be  
21  
22 235 collected. Blood glucose concentrations will be analysed immediately using the YSI 2300  
23  
24 236 STAT plus glucose and lactate analyzer (YSI Inc., Yellow Springs, OH, USA) from 30  $\mu$ L of  
25  
26 237 blood from one microvette. Additional 30  $\mu$ l volumes of whole blood will be aliquoted onto  
27  
28 238 two separate Reflotron test strips (Roche Diagnostics, Burgess Hill, UK) for the  
29  
30 239 measurement of triglyceride and HDL concentrations using the Reflotron Plus system  
31  
32 240 (Roche Diagnostics, Burgess Hill, UK). The remaining whole blood ( $\sim$ 490  $\mu$ L) will be  
33  
34 241 centrifuged at 2500 x g for 5 min (Heraeus Pico 17, Thermo Scientific, Loughborough, UK)  
35  
36 242 and the plasma then stored at  $-80^{\circ}$ C. An enzyme-linked immunosorbent assay kit will be  
37  
38 243 used to determine plasma concentrations of insulin (Mercodia, Uppsala, Sweden).

39 244

40 245 *Blood pressure*

41  
42  
43 246 Blood pressure will be measured at baseline as described above followed by single readings  
44  
45 247 taken at 60, 120, 180, 240, 300, and 330 min. Readings will be taken 5 min before the hourly  
46  
47 248 activity bouts in SED-ACT. Blood pressure will be measured using an automated oscillatory  
48  
49 249 blood pressure monitor (Omron M5-I; Omron Matsusaka Co. Ltd., Matsusaka, Japan).

50 250

51 251 *Study outcomes*

1  
2  
3 252 *Primary outcome:* the primary outcome for the study is within-participant, between condition  
4  
5 253 postprandial glucose net incremental area under the curve (iAUC) [11]. *Secondary*  
6  
7 254 *outcomes:* these include within-participant, between condition mean systolic and diastolic  
8  
9 255 blood pressure, and net iAUC for postprandial triglycerides, HDL and insulin. Positive iAUC  
10  
11 256 and total AUC will also be calculated for postprandial triglycerides, HDL and insulin to permit  
12  
13 257 comparisons with previous studies. *Feasibility measures:* to assess feasibility of the trial,  
14  
15 258 participant dropout, number of experimental sessions completed, fatigue at the beginning  
16  
17 259 and end of each day rated on an 11-point (0 “not fatigued at all” to 10 “extremely fatigued”)  
18  
19 260 Visual Analogue Scale (VAS), and the degree of difficulty in completing each experimental  
20  
21 261 condition rated on an 11-point VAS (0 “not difficult at all” to 10 “extremely difficult”) will be  
22  
23 262 recorded. Participants will also complete the Physical Activity Enjoyment Scale [48] at the  
24  
25 263 end of the SED-ACT condition and report their enjoyment on a 200 mm VAS [49]  
26  
27 264 (“Enjoyment”) 20 min after the last activity bout in the SED-ACT condition. Participants will  
28  
29 265 also report on the same scale how enjoyable they would find it to engage in this form of  
30  
31 266 physical activity most days of the week in the coming month (“Expected enjoyment”).  
32  
33 267 *Psychological outcomes:* correlates of sedentary behaviour will be measured immediately  
34  
35 268 before and after each experimental condition to explore whether participants’ mood, affect,  
36  
37 269 wellbeing, and social cognitions regarding their ability to overcome being sedentary may  
38  
39 270 differ in response to the SED-ACT condition compared with the SED condition. These  
40  
41 271 measures will be based on the COM-B framework [50] using standardised wording formats  
42  
43 272 [51] that will include overcoming barriers (self-efficacy/perceived behavioural control),  
44  
45 273 attitudes, intentions and action planning. The following questionnaires will be completed in  
46  
47 274 this order: psychological wellbeing using the National Wellbeing Measurement [52]; the  
48  
49 275 Warwick Edinburgh Mental Well-Being Scale [53]; current mood using the short Positive and  
50  
51 276 Negative Affect Scale [54]; and an adapted version of the Schwarzer and Renner [55]  
52  
53 277 Physical Exercise Self-Efficacy Scale to measure self-efficacy to avoid long periods of  
54  
55 278 sedentary time. These measures will be taken at the end of each experimental condition  
56  
57 279 (330 min) meaning that each questionnaire will be completed within 45 min following the last

1  
2  
3 280 bout of activity in the SED-ACT condition. This is an appropriate time frame based on  
4  
5 281 evidence that mood and affect is enhanced for 3-4 hours following a single session of  
6  
7 282 exercise [56]. Although between-participant variation in the time taken to complete each  
8  
9 283 questionnaire is anticipated, within-participant variation is expected to be limited therefore  
10  
11 284 permitting valid between-condition comparisons.

12 285

13  
14 286 *Sample size calculations*

15  
16 287 Sample size calculations were performed using GPower [57]. Previous research reported a  
17  
18 288 16% reduction (effect size,  $F=0.61$ ) in 5 h postprandial glucose total AUC when breaking up  
19  
20 289 prolonged sedentary time with 2 min light-intensity walking every 20 min versus  
21  
22 290 uninterrupted sitting in able-bodied participants [28]. As this study will use arm cranking  
23  
24 291 (localised muscular contractions) as opposed to walking where a larger muscle mass is  
25  
26 292 required, a smaller effect may be observed. Based on this, it was estimated that 14  
27  
28 293 participants would be required for this complete two-treatment crossover design to detect a  
29  
30 294 medium effect size ( $F=0.4$ ) with a within-person correlation of 0.6, 80% power, and an  $\alpha$  of  
31  
32 295 0.05. To allow for potential withdrawals, a total of 20 participants will be recruited.

33 296

34  
35  
36 297 *Statistical analysis*

37  
38 298 Linear mixed models will be used to determine differences in the primary and secondary  
39  
40 299 outcome variables between the conditions. All models will adjust for potential covariates  
41  
42 300 explaining residual outcome variances (age, body fat% gender, lesion level, completeness of  
43  
44 301 lesion and pre-prandial outcome values). Statistical significance will be accepted as  $p<0.05$ .  
45  
46 302 Cohens' d effect sizes will be calculated to describe the magnitude of differences between  
47  
48 303 conditions [58]. Individuals' responses for CVD risk marker outcomes will also be compared  
49  
50 304 between the conditions to determine the number of participants who respond to the  
51  
52 305 experimental protocols.

53 306

54  
55  
56 307 *Patient and Public Involvement*

1  
2  
3 308 Patients and public were not involved with the development of the research question,  
4  
5 309 outcome measures or study design, nor will they be involved with the conduct of the study.  
6  
7 310 The recruitment plan was informed based on feedback from patients and public. A summary  
8  
9 311 of the study results will be provided to each of the study participants.  
10  
11  
12  
13  
14  
15  
16  
17  
18  
19  
20  
21  
22  
23  
24  
25  
26  
27  
28  
29  
30  
31  
32  
33  
34  
35  
36  
37  
38  
39  
40  
41  
42  
43  
44  
45  
46  
47  
48  
49  
50  
51  
52  
53  
54  
55  
56  
57  
58  
59  
60

For peer review only



1  
2  
3 312 **Ethics and dissemination**

4 313 This study was approved on the 19<sup>th</sup> May 2017 by the Cambridge South NHS Research  
5  
6 314 Ethics Committee (reference 17/EE/0076). Personal information about potential and enrolled  
7  
8 315 participants will be stored in electronic format on password protected computers or in hard  
9  
10 316 copy format in locked filing cabinets at the University of Bedfordshire. Only members of the  
11  
12 317 research team will have access to this information. All personal information will be destroyed  
13  
14 318 after a period of five years. Individuals will be referred to in anonymised fashion in any  
15  
16 319 published data.  
17

18  
19 320

20 321 The findings of this research will be disseminated to lay, academic, practice, and policy-  
21  
22 322 based audiences via presentation at conference proceedings; publication in a peer review  
23  
24 323 journal; websites, newsletters, and social media; and summary reports to policy makers and  
25  
26 324 clinical care partners. The final trial dataset will be made available as supplementary  
27  
28 325 material when the findings of the study are published in a peer review journal. Any protocol  
29  
30 326 modifications will be communicated to the Cambridge South NHS Research Ethics  
31  
32 327 Committee, recorded in the study's ISRCTN clinical trials registry, and detailed in a journal  
33  
34 328 publication of the study findings.  
35

36  
37 329

38 330 **Acknowledgements:** The authors would like to thank Dr Jan van der Scheer for providing  
39  
40 331 his advice on the design of the study protocol. We would also like to thank the patients and  
41  
42 332 public who helped to inform the recruitment strategy for this study.  
43

44  
45 333

46 334 **Author contributions**

47  
48 335 DB and LC conceptualised the study.

49  
50 336 TW, LC, VT, DD, CL, and DB contributed to the design of the study protocol.

51  
52 337 TW drafted the manuscript.

53  
54 338 TW, LC, VT, DD, CL, and DB commented and edited each section of the manuscript and  
55  
56 339 approved the final version.  
57

1  
2  
3 340

4  
5 341 **Funding statement**

6  
7 342 This work is supported by Heart Research UK grant number RG2655/17/18. The funder has  
8  
9 343 no role in the study design; collection, management, analysis, and interpretation of data;  
10  
11 344 writing of any reports; and the decision to submit any reports for publication, and will not  
12  
13 345 have authority over any of these activities.

14  
15 346

16  
17 347 **Conflicts of interest**

18  
19 348 None of the authors have declared any conflicts of interest.

20  
21 349

22  
23 350  
24  
25  
26  
27  
28  
29  
30  
31  
32  
33  
34  
35  
36  
37  
38  
39  
40  
41  
42  
43  
44  
45  
46  
47  
48  
49  
50  
51  
52  
53  
54  
55  
56  
57  
58  
59  
60

351 **References**

- 352 1. Lee, B.B., et al., *The global map for traumatic spinal cord injury epidemiology: update*  
353 *2011, global incidence rate*. Spinal Cord, 2014. **52**(2): p. 110-6.
- 354 2. British Society of Rehabilitation Medicine, *Chronic spinal cord injury: management of*  
355 *patients in acute hospital settings: National Guidelines*. Available at  
356 <http://www.bsrn.org.uk/downloads/sciwebversion.pdf> (accessed 26 April 2016).  
357 2008.
- 358 3. Garshick, E., et al., *A prospective assessment of mortality in chronic spinal cord*  
359 *injury*. Spinal Cord, 2005. **43**(7): p. 408-16.
- 360 4. Cragg, J.J., et al., *Cardiovascular disease and spinal cord injury: results from a*  
361 *national population health survey*. Neurology, 2013. **81**(8): p. 723-8.
- 362 5. Gorgey, A.S., et al., *Effects of spinal cord injury on body composition and metabolic*  
363 *profile - part I*. J Spinal Cord Med, 2014. **37**(6): p. 693-702.
- 364 6. Bauman, W.A. and A.M. Spungen, *Disorders of carbohydrate and lipid metabolism in*  
365 *veterans with paraplegia or quadriplegia: A model of premature aging*. Metabolism,  
366 1994. **43**(6): p. 749-756.
- 367 7. Wahman, K., et al., *Cardiovascular disease risk factors in persons with paraplegia:*  
368 *the Stockholm spinal cord injury study*. J Rehabil Med, 2010. **42**(3): p. 272-8.
- 369 8. Ford, E.S., W.H. Giles, and W.H. Dietz, *Prevalence of the metabolic syndrome*  
370 *among US adults: findings from the third National Health and Nutrition Examination*  
371 *Survey*. Jama, 2002. **287**(3): p. 356-359.
- 372 9. Gater, D.R., Jr., *Obesity after spinal cord injury*. Phys Med Rehabil Clin N Am, 2007.  
373 **18**(2): p. 333-51, vii.
- 374 10. Gorgey, A.S., et al., *The effects of electrical stimulation on body composition and*  
375 *metabolic profile after spinal cord injury--Part II*. J Spinal Cord Med, 2015. **38**(1): p.  
376 23-37.
- 377 11. O'Keefe, J.H. and D.S. Bell, *Postprandial hyperglycemia/hyperlipidemia (postprandial*  
378 *dysmetabolism) is a cardiovascular risk factor*. Am J Cardiol, 2007. **100**(5): p. 899-  
379 904.
- 380 12. Esposito, K., et al., *Regression of carotid atherosclerosis by control of postprandial*  
381 *hyperglycemia in type 2 diabetes mellitus*. Circulation, 2004. **110**(2): p. 214-9.
- 382 13. Smith, N.L., et al., *Fasting and 2-hour postchallenge serum glucose measures and*  
383 *risk of incident cardiovascular events in the elderly: the Cardiovascular Health Study*.  
384 Archives of internal medicine, 2002. **162**(2): p. 209-216.
- 385 14. Duckworth, W.C., P. Jallepalli, and S.S. Solomon, *Glucose intolerance in spinal cord*  
386 *injury*. Arch Phys Med Rehabil, 1983. **64**(3): p. 107-10.

- 1  
2  
3 387 15. Bauman, W.A., et al., *The effect of residual neurological deficit on oral glucose*  
4 388 *tolerance in persons with chronic spinal cord injury*. Spinal Cord, 1999. **37**(11): p.  
5 389 765-71.  
6  
7 390 16. Raymond, J., et al., *Glucose tolerance and physical activity level in people with spinal*  
8 391 *cord injury*. Spinal Cord, 2010. **48**(8): p. 591-6.  
9  
10 392 17. Bauman, W.A., et al., *The effect of residual neurological deficit on serum lipoproteins*  
11 393 *in individuals with chronic spinal cord injury*. Spinal Cord, 1998. **36**(1): p. 13-7.  
12  
13 394 18. Nash, M.S., et al., *Evidence for an exaggerated postprandial lipemia in chronic*  
14 395 *paraplegia*. J Spinal Cord Med, 2005. **28**(4): p. 320-5.  
15  
16 396 19. Groah, S.L., et al., *Nutrient intake and body habitus after spinal cord injury: an*  
17 397 *analysis by sex and level of injury*. J Spinal Cord Med, 2009. **32**(1): p. 25-33.  
18  
19 398 20. Martin Ginis, K.A., et al., *Evidence-based scientific exercise guidelines for adults with*  
20 399 *spinal cord injury: an update and a new guideline*. 2017.  
21  
22 400 21. Martin Ginis, K.A., et al., *Leisure time physical activity in a population-based sample*  
23 401 *of people with spinal cord injury part II: activity types, intensities, and durations*. Arch  
24 402 Phys Med Rehabil, 2010. **91**(5): p. 729-33.  
25  
26 403 22. Buchholz, A.C., et al., *Greater daily leisure time physical activity is associated with*  
27 404 *lower chronic disease risk in adults with spinal cord injury*. Appl Physiol Nutr Metab,  
28 405 2009. **34**(4): p. 640-7.  
29  
30 406 23. Martin Ginis, K.A., et al., *The development of evidence-informed physical activity*  
31 407 *guidelines for adults with spinal cord injury*. Spinal Cord, 2011. **49**(11): p. 1088-96.  
32  
33 408 24. Tremblay, M.S., et al., *Sedentary Behavior Research Network (SBRN) - Terminology*  
34 409 *Consensus Project process and outcome*. Int J Behav Nutr Phys Act, 2017. **14**(1): p.  
35 410 75.  
36  
37 411 25. Dunstan, D.W., A.A. Thorp, and G.N. Healy, *Prolonged sitting: is it a distinct coronary*  
38 412 *heart disease risk factor?* Curr Opin Cardiol, 2011. **26**(5): p. 412-9.  
39  
40 413 26. Dunstan, D.W., et al., *Breaking up prolonged sitting reduces postprandial glucose*  
41 414 *and insulin responses*. Diabetes Care, 2012. **35**(5): p. 976-83.  
42  
43 415 27. Miyashita, M., et al., *Interrupting Sitting Time with Regular Walks Attenuates*  
44 416 *Postprandial Triglycerides*. Int J Sports Med, 2016. **37**(2): p. 97-103.  
45  
46 417 28. Bailey, D.P. and C.D. Locke, *Breaking up prolonged sitting with light-intensity walking*  
47 418 *improves postprandial glycemia, but breaking up sitting with standing does not*. J Sci  
48 419 Med Sport, 2015. **18**(3): p. 294-8.  
49  
50 420 29. Larsen, R.N., et al., *Breaking up prolonged sitting reduces resting blood pressure in*  
51 421 *overweight/obese adults*. Nutr Metab Cardiovasc Dis, 2014. **24**(9): p. 976-82.  
52  
53 422 30. Chan, A.-W., et al., *SPIRIT 2013 statement: defining standard protocol items for*  
54 423 *clinical trials*. Annals of internal medicine, 2013. **158**(3): p. 200-207.  
55  
56  
57  
58  
59

- 1  
2  
3 424 31. New, P.W. and R. Marshall, *International Spinal Cord Injury Data Sets for non-*  
4 425 *traumatic spinal cord injury*. Spinal Cord, 2014. **52**(2): p. 123-32.
- 5  
6 426 32. Jacobs, P.L. and M.S. Nash, *Exercise recommendations for individuals with spinal*  
7 427 *cord injury*. Sports Med, 2004. **34**(11): p. 727-51.
- 8  
9 428 33. Ekelund, U., et al., *Does physical activity attenuate, or even eliminate, the*  
10 429 *detrimental association of sitting time with mortality? A harmonised meta-analysis of*  
11 430 *data from more than 1 million men and women*. Lancet, 2016. **388**(10051): p. 1302-  
12 431 10.
- 13  
14 432 34. Keil, M., et al., *Measurement precision of body composition variables in elite*  
15 433 *wheelchair athletes, using dual-energy X-ray absorptiometry*. European journal of  
16 434 sport science, 2016. **16**(1): p. 65-71.
- 17  
18 435 35. Spungen, A.M., et al., *Factors influencing body composition in persons with spinal*  
19 436 *cord injury: a cross-sectional study*. J Appl Physiol (1985), 2003. **95**(6): p. 2398-407.
- 20  
21 437 36. Gorgey, A.S., D.R. Dolbow, and D.R. Gater, Jr., *A model of prediction and cross-*  
22 438 *validation of fat-free mass in men with motor complete spinal cord injury*. Arch Phys  
23 439 Med Rehabil, 2012. **93**(7): p. 1240-5.
- 24  
25 440 37. Marfell-Jones, M.J., A.D. Stewart, and J.H. De Ridder, *International standards for*  
26 441 *anthropometric assessment*. 2012.
- 27  
28 442 38. Willems, A., et al., *Dual-Energy X-Ray Absorptiometry, Skinfold Thickness, and*  
29 443 *Waist Circumference for Assessing Body Composition in Ambulant and Non-*  
30 444 *Ambulant Wheelchair Games Players*. Front Physiol, 2015. **6**: p. Article 356.
- 31  
32 445 39. Borg, G.A., *Psychophysical bases of perceived exertion*. Med Sci Sports Exerc,  
33 446 1982. **14**(5): p. 377-81.
- 34  
35 447 40. Bailey, D.P., et al., *Effects of breaking up prolonged sitting following low and high*  
36 448 *glycaemic index breakfast consumption on glucose and insulin concentrations*. Eur J  
37 449 Appl Physiol, 2017.
- 38  
39 450 41. van der Scheer, J.W., et al., *Reliability and Validity of Subjective Measures of*  
40 451 *Aerobic Intensity in Adults With Spinal Cord Injury: A Systematic Review*. PM R,  
41 452 2017.
- 42  
43 453 42. Bailey, D.P., et al., *Breaking up prolonged sitting time with walking does not affect*  
44 454 *appetite or gut hormone concentrations but does induce an energy deficit and*  
45 455 *suppresses postprandial glycaemia in sedentary adults*. Appl Physiol Nutr Metab,  
46 456 2016. **41**(3): p. 324-31.
- 47  
48 457 43. Burr, J.F., R.J. Shephard, and E.P. Zehr, *Physical activity after stroke and spinal cord*  
49 458 *injury: evidence-based recommendations on clearance for physical activity and*  
50 459 *exercise*. Can Fam Physician, 2012. **58**(11): p. 1236-9.

- 1  
2  
3 460 44. Schofield, W.N., *Predicting basal metabolic rate, new standards and review of*  
4 461 *previous work*. Hum Nutr Clin Nutr, 1985. **39 Suppl 1**: p. 5-41.
- 5  
6 462 45. Food Standards Agency, *FSA nutrient and food based guidelines for UK institutions*.  
7 463 *Available at:*  
8  
9 464 <http://www.food.gov.uk/sites/default/files/multimedia/pdfs/nutrientinstitution.pdf>  
10 465 *(accessed 18 Jan 2016)*. 2007.
- 11  
12 466 46. Atkinson, F.S., K. Foster-Powell, and J.C. Brand-Miller, *International tables of*  
13 467 *glycemic index and glycemic load values: 2008*. Diabetes Care, 2008. **31**(12): p.  
14 468 2281-3.
- 15  
16 469 47. Wolever, T.M. and D.J. Jenkins, *The use of the glycemic index in predicting the blood*  
17 470 *glucose response to mixed meals*. Am J Clin Nutr, 1986. **43**(1): p. 167-72.
- 18  
19 471 48. Kendzierski, D. and K. DeCarlo, *Physical activity enjoyment scale: two validation*  
20 472 *studies*. J Sport Ex Psych, 1991. **13**: p. 50-64.
- 21  
22 473 49. Svensson, E., *Comparison of the Quality of Assessments Using Continuous and*  
23 474 *Discrete Ordinal Rating Scales*. Biom J, 2000. **42**(4): p. 417-434.
- 24  
25 475 50. Michie, S., et al., *A refined taxonomy of behaviour change techniques to help people*  
26 476 *change their physical activity and healthy eating behaviours: the CALO-RE*  
27 477 *taxonomy*. Psychol Health, 2011. **26**(11): p. 1479-98.
- 28  
29 478 51. Francis, J., et al., *Constructing questionnaires based on the theory of planned*  
30 479 *behaviour: A manual for health services researchers*. Newcastle upon Tyne, UK:  
31 480 *Centre for Health Services Research, University of Newcastle upon Tyne*. 2004.
- 32  
33 481 52. Tinkler, L. *Measuring National Well-being: Personal Well-being in the UK, 2014 to*  
34 482 *2015*. 2015; Available from:  
35 483 <https://www.ons.gov.uk/peoplepopulationandcommunity/wellbeing/bulletins/measuring-nationalwellbeing/2015-09-23>.  
36 484
- 37  
38 485 53. Tennant, R., et al., *The Warwick-Edinburgh Mental Well-being Scale (WEMWBS):*  
39 486 *development and UK validation*. Health and Quality of Life Outcomes, 2007. **5**(1): p.  
40 487 63.
- 41  
42 488 54. Thompson, E.R., *Development and Validation of an Internationally Reliable Short-*  
43 489 *Form of the Positive and Negative Affect Schedule (PANAS)*. Journal of Cross-  
44 490 *Cultural Psychology*, 2007. **38**(2): p. 227-242.
- 45  
46 491 55. Schwarzer, R. and B. Renner, *Social-cognitive predictors of health behavior: action*  
47 492 *self-efficacy and coping self-efficacy*. Health Psychol, 2000. **19**(5): p. 487-95.
- 48  
49 493 56. Yeung, R.R., *The acute effects of exercise on mood state*. J Psychosom Res, 1996.  
50 494 **40**(2): p. 123-41.
- 51  
52 495 57. Faul, F., et al., *G\*Power 3: a flexible statistical power analysis program for the social,*  
53 496 *behavioral, and biomedical sciences*. Behav Res Methods, 2007. **39**(2): p. 175-91.

1  
2  
3  
4  
5  
6  
7  
8  
9  
10  
11  
12  
13  
14  
15  
16  
17  
18  
19  
20  
21  
22  
23  
24  
25  
26  
27  
28  
29  
30  
31  
32  
33  
34  
35  
36  
37  
38  
39  
40  
41  
42  
43  
44  
45  
46  
47  
48  
49  
50  
51  
52  
53  
54  
55  
56  
57  
58  
59  
60

497 58. Cohen, J., *Statistical power analysis for the behavioral sciences*. 2nd ed. 1988,  
498 Hillsdale, NJ: Erlbaum.  
499

For peer review only

1  
2  
3 **Figure captions**  
4

5 **Figure 1** Study schedule.  
6

7  
8 **Figure 2** Schematic of experimental protocol.  
9  
10  
11  
12  
13  
14  
15  
16  
17  
18  
19  
20  
21  
22  
23  
24  
25  
26  
27  
28  
29  
30  
31  
32  
33  
34  
35  
36  
37  
38  
39  
40  
41  
42  
43  
44  
45  
46  
47  
48  
49  
50  
51  
52  
53  
54  
55  
56  
57  
58  
59  
60

For peer review only





Figure 1 Study schedule.

43x56mm (300 x 300 DPI)



Figure 2 Schematic of experimental protocol.

85x30mm (300 x 300 DPI)

peer review only

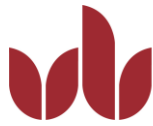University of  
Bedfordshire

Version 2 (14/03/2017)

Participant Identification Number for this trial: \_\_\_\_\_

## CONSENT FORM

Title of Project: The Spinal Cord Injury Move More (SCIMM) study: The benefits of breaking up prolonged sedentary time on cardiovascular disease risk markers in people with spinal cord injury

Please initial box

1. I confirm that I have read and understand the information sheet dated [07/08/2017] (version 9) for the above study. I have had the opportunity to consider the information, ask questions and have had these answered satisfactorily.
2. I understand that my participation is voluntary and that I am free to withdraw at any time without giving any reason, without my medical care or legal rights being affected.
3. I understand that relevant sections of my data collected during the study may be looked at by individuals from the University of Bedfordshire or from regulatory authorities, where it is relevant to my taking part in this research. I give permission for these individuals to have access to my records.
4. In the event that the results from the DXA bone scan show that I have low bone mineral density I agree to being notified of this in a letter that will advise me to contact my GP for further investigation about the results.
5. I agree to my GP being notified of my taking part in this study.
6. I agree to take part in the above study.

\_\_\_\_\_  
Name of Participant

\_\_\_\_\_  
Date

\_\_\_\_\_  
Signature

\_\_\_\_\_  
Email

\_\_\_\_\_  
Mobile

\_\_\_\_\_  
GP Name

\_\_\_\_\_  
GP Address

\_\_\_\_\_  
Researcher

\_\_\_\_\_  
Date

\_\_\_\_\_  
Signature

**Please return this form to:** Thomas Withers, Institute for Sport and Physical Activity Research, University of Bedfordshire, Polhill Avenue, Bedford, MK41 9EA.

Email: [thomas.withers@beds.ac.uk](mailto:thomas.withers@beds.ac.uk)



SPIRIT 2013 Checklist: Recommended items to address in a clinical trial protocol and related documents\*

| Section/item                      | Item No | Description                                                                                                                                                                                                                                                                              | Addressed on page number |
|-----------------------------------|---------|------------------------------------------------------------------------------------------------------------------------------------------------------------------------------------------------------------------------------------------------------------------------------------------|--------------------------|
| <b>Administrative information</b> |         |                                                                                                                                                                                                                                                                                          |                          |
| Title                             | 1       | Descriptive title identifying the study design, population, interventions, and, if applicable, trial acronym                                                                                                                                                                             | ___ 1 ___                |
| Trial registration                | 2a      | Trial identifier and registry name. If not yet registered, name of intended registry                                                                                                                                                                                                     | ___ 2 ___                |
|                                   | 2b      | All items from the World Health Organization Trial Registration Data Set                                                                                                                                                                                                                 | ___ 2 ___                |
| Protocol version                  | 3       | Date and version identifier                                                                                                                                                                                                                                                              | ___ NA ___               |
| Funding                           | 4       | Sources and types of financial, material, and other support                                                                                                                                                                                                                              | ___ 1 ___                |
| Roles and responsibilities        | 5a      | Names, affiliations, and roles of protocol contributors                                                                                                                                                                                                                                  | ___ 14 ___               |
|                                   | 5b      | Name and contact information for the trial sponsor                                                                                                                                                                                                                                       | ___ NA ___               |
|                                   | 5c      | Role of study sponsor and funders, if any, in study design; collection, management, analysis, and interpretation of data; writing of the report; and the decision to submit the report for publication, including whether they will have ultimate authority over any of these activities | ___ 14 ___               |
|                                   | 5d      | Composition, roles, and responsibilities of the coordinating centre, steering committee, endpoint adjudication committee, data management team, and other individuals or groups overseeing the trial, if applicable (see Item 21a for data monitoring committee)                         | ___ NA ___               |

1  
2  
3  
4  
5  
6  
7  
8  
9  
10  
11  
12  
13  
14  
15  
16  
17  
18  
19  
20  
21  
22  
23  
24  
25  
26  
27  
28  
29  
30  
31  
32  
33  
34  
35  
36  
37  
38  
39  
40  
41  
42  
43  
44  
45  
46  
47**Introduction**

|                          |    |                                                                                                                                                                                                           |               |
|--------------------------|----|-----------------------------------------------------------------------------------------------------------------------------------------------------------------------------------------------------------|---------------|
| Background and rationale | 6a | Description of research question and justification for undertaking the trial, including summary of relevant studies (published and unpublished) examining benefits and harms for each intervention        | _____4-6_____ |
|                          | 6b | Explanation for choice of comparators                                                                                                                                                                     | _____NA_____  |
| Objectives               | 7  | Specific objectives or hypotheses                                                                                                                                                                         | _____5_____   |
| Trial design             | 8  | Description of trial design including type of trial (eg, parallel group, crossover, factorial, single group), allocation ratio, and framework (eg, superiority, equivalence, noninferiority, exploratory) | _____6_____   |

**Methods: Participants, interventions, and outcomes**

|                      |     |                                                                                                                                                                                                                                                                                                                                                                                |                |
|----------------------|-----|--------------------------------------------------------------------------------------------------------------------------------------------------------------------------------------------------------------------------------------------------------------------------------------------------------------------------------------------------------------------------------|----------------|
| Study setting        | 9   | Description of study settings (eg, community clinic, academic hospital) and list of countries where data will be collected. Reference to where list of study sites can be obtained                                                                                                                                                                                             | _____6_____    |
| Eligibility criteria | 10  | Inclusion and exclusion criteria for participants. If applicable, eligibility criteria for study centres and individuals who will perform the interventions (eg, surgeons, psychotherapists)                                                                                                                                                                                   | _____6-7_____  |
| Interventions        | 11a | Interventions for each group with sufficient detail to allow replication, including how and when they will be administered                                                                                                                                                                                                                                                     | _____9_____    |
|                      | 11b | Criteria for discontinuing or modifying allocated interventions for a given trial participant (eg, drug dose change in response to harms, participant request, or improving/worsening disease)                                                                                                                                                                                 | _____NA_____   |
|                      | 11c | Strategies to improve adherence to intervention protocols, and any procedures for monitoring adherence (eg, drug tablet return, laboratory tests)                                                                                                                                                                                                                              | _____NA_____   |
|                      | 11d | Relevant concomitant care and interventions that are permitted or prohibited during the trial                                                                                                                                                                                                                                                                                  | _____NA_____   |
| Outcomes             | 12  | Primary, secondary, and other outcomes, including the specific measurement variable (eg, systolic blood pressure), analysis metric (eg, change from baseline, final value, time to event), method of aggregation (eg, median, proportion), and time point for each outcome. Explanation of the clinical relevance of chosen efficacy and harm outcomes is strongly recommended | _____12_____   |
| Participant timeline | 13  | Time schedule of enrolment, interventions (including any run-ins and washouts), assessments, and visits for participants. A schematic diagram is highly recommended (see Figure)                                                                                                                                                                                               | _____7-10_____ |

|   |             |    |                                                                                                                                                                                       |              |
|---|-------------|----|---------------------------------------------------------------------------------------------------------------------------------------------------------------------------------------|--------------|
| 1 |             |    |                                                                                                                                                                                       |              |
| 2 |             |    |                                                                                                                                                                                       |              |
| 3 | Sample size | 14 | Estimated number of participants needed to achieve study objectives and how it was determined, including clinical and statistical assumptions supporting any sample size calculations | _____13_____ |
| 4 |             |    |                                                                                                                                                                                       |              |
| 5 | Recruitment | 15 | Strategies for achieving adequate participant enrolment to reach target sample size                                                                                                   | _____7_____  |
| 6 |             |    |                                                                                                                                                                                       |              |
| 7 |             |    |                                                                                                                                                                                       |              |

### 8 **Methods: Assignment of interventions (for controlled trials)**

#### 9 Allocation:

|    |                                  |     |                                                                                                                                                                                                                                                                                                                                                          |              |
|----|----------------------------------|-----|----------------------------------------------------------------------------------------------------------------------------------------------------------------------------------------------------------------------------------------------------------------------------------------------------------------------------------------------------------|--------------|
| 10 |                                  |     |                                                                                                                                                                                                                                                                                                                                                          |              |
| 11 |                                  |     |                                                                                                                                                                                                                                                                                                                                                          |              |
| 12 | Sequence generation              | 16a | Method of generating the allocation sequence (eg, computer-generated random numbers), and list of any factors for stratification. To reduce predictability of a random sequence, details of any planned restriction (eg, blocking) should be provided in a separate document that is unavailable to those who enrol participants or assign interventions | _____6_____  |
| 13 |                                  |     |                                                                                                                                                                                                                                                                                                                                                          |              |
| 14 |                                  |     |                                                                                                                                                                                                                                                                                                                                                          |              |
| 15 |                                  |     |                                                                                                                                                                                                                                                                                                                                                          |              |
| 16 |                                  |     |                                                                                                                                                                                                                                                                                                                                                          |              |
| 17 | Allocation concealment mechanism | 16b | Mechanism of implementing the allocation sequence (eg, central telephone; sequentially numbered, opaque, sealed envelopes), describing any steps to conceal the sequence until interventions are assigned                                                                                                                                                | _____6_____  |
| 18 |                                  |     |                                                                                                                                                                                                                                                                                                                                                          |              |
| 19 |                                  |     |                                                                                                                                                                                                                                                                                                                                                          |              |
| 20 |                                  |     |                                                                                                                                                                                                                                                                                                                                                          |              |
| 21 | Implementation                   | 16c | Who will generate the allocation sequence, who will enrol participants, and who will assign participants to interventions                                                                                                                                                                                                                                | _____6_____  |
| 22 |                                  |     |                                                                                                                                                                                                                                                                                                                                                          |              |
| 23 |                                  |     |                                                                                                                                                                                                                                                                                                                                                          |              |
| 24 | Blinding (masking)               | 17a | Who will be blinded after assignment to interventions (eg, trial participants, care providers, outcome assessors, data analysts), and how                                                                                                                                                                                                                | _____NA_____ |
| 25 |                                  |     |                                                                                                                                                                                                                                                                                                                                                          |              |
| 26 |                                  |     |                                                                                                                                                                                                                                                                                                                                                          |              |
| 27 |                                  | 17b | If blinded, circumstances under which unblinding is permissible, and procedure for revealing a participant's allocated intervention during the trial                                                                                                                                                                                                     | _____NA_____ |
| 28 |                                  |     |                                                                                                                                                                                                                                                                                                                                                          |              |
| 29 |                                  |     |                                                                                                                                                                                                                                                                                                                                                          |              |
| 30 |                                  |     |                                                                                                                                                                                                                                                                                                                                                          |              |

### 31 **Methods: Data collection, management, and analysis**

|    |                         |     |                                                                                                                                                                                                                                                                                                                                                                                                              |                |
|----|-------------------------|-----|--------------------------------------------------------------------------------------------------------------------------------------------------------------------------------------------------------------------------------------------------------------------------------------------------------------------------------------------------------------------------------------------------------------|----------------|
| 32 |                         |     |                                                                                                                                                                                                                                                                                                                                                                                                              |                |
| 33 | Data collection methods | 18a | Plans for assessment and collection of outcome, baseline, and other trial data, including any related processes to promote data quality (eg, duplicate measurements, training of assessors) and a description of study instruments (eg, questionnaires, laboratory tests) along with their reliability and validity, if known. Reference to where data collection forms can be found, if not in the protocol | _____8-12_____ |
| 34 |                         |     |                                                                                                                                                                                                                                                                                                                                                                                                              |                |
| 35 |                         |     |                                                                                                                                                                                                                                                                                                                                                                                                              |                |
| 36 |                         |     |                                                                                                                                                                                                                                                                                                                                                                                                              |                |
| 37 |                         |     |                                                                                                                                                                                                                                                                                                                                                                                                              |                |
| 38 |                         | 18b | Plans to promote participant retention and complete follow-up, including list of any outcome data to be collected for participants who discontinue or deviate from intervention protocols                                                                                                                                                                                                                    | _____7_____    |
| 39 |                         |     |                                                                                                                                                                                                                                                                                                                                                                                                              |                |
| 40 |                         |     |                                                                                                                                                                                                                                                                                                                                                                                                              |                |
| 41 |                         |     |                                                                                                                                                                                                                                                                                                                                                                                                              |                |
| 42 |                         |     |                                                                                                                                                                                                                                                                                                                                                                                                              |                |
| 43 |                         |     |                                                                                                                                                                                                                                                                                                                                                                                                              |                |
| 44 |                         |     |                                                                                                                                                                                                                                                                                                                                                                                                              |                |
| 45 |                         |     |                                                                                                                                                                                                                                                                                                                                                                                                              |                |
| 46 |                         |     |                                                                                                                                                                                                                                                                                                                                                                                                              |                |
| 47 |                         |     |                                                                                                                                                                                                                                                                                                                                                                                                              |                |

|    |                                 |     |                                                                                                                                                                                                                                                                                                                                       |                |
|----|---------------------------------|-----|---------------------------------------------------------------------------------------------------------------------------------------------------------------------------------------------------------------------------------------------------------------------------------------------------------------------------------------|----------------|
| 1  |                                 |     |                                                                                                                                                                                                                                                                                                                                       |                |
| 2  |                                 |     |                                                                                                                                                                                                                                                                                                                                       |                |
| 3  | Data management                 | 19  | Plans for data entry, coding, security, and storage, including any related processes to promote data quality (eg, double data entry; range checks for data values). Reference to where details of data management procedures can be found, if not in the protocol                                                                     | _____ 14 _____ |
| 4  |                                 |     |                                                                                                                                                                                                                                                                                                                                       |                |
| 5  |                                 |     |                                                                                                                                                                                                                                                                                                                                       |                |
| 6  |                                 |     |                                                                                                                                                                                                                                                                                                                                       |                |
| 7  | Statistical methods             | 20a | Statistical methods for analysing primary and secondary outcomes. Reference to where other details of the statistical analysis plan can be found, if not in the protocol                                                                                                                                                              | _____ 13 _____ |
| 8  |                                 |     |                                                                                                                                                                                                                                                                                                                                       |                |
| 9  |                                 |     |                                                                                                                                                                                                                                                                                                                                       |                |
| 10 |                                 | 20b | Methods for any additional analyses (eg, subgroup and adjusted analyses)                                                                                                                                                                                                                                                              | _____ 13 _____ |
| 11 |                                 |     |                                                                                                                                                                                                                                                                                                                                       |                |
| 12 |                                 | 20c | Definition of analysis population relating to protocol non-adherence (eg, as randomised analysis), and any statistical methods to handle missing data (eg, multiple imputation)                                                                                                                                                       | _____ NA _____ |
| 13 |                                 |     |                                                                                                                                                                                                                                                                                                                                       |                |
| 14 |                                 |     |                                                                                                                                                                                                                                                                                                                                       |                |
| 15 | <b>Methods: Monitoring</b>      |     |                                                                                                                                                                                                                                                                                                                                       |                |
| 16 |                                 |     |                                                                                                                                                                                                                                                                                                                                       |                |
| 17 | Data monitoring                 | 21a | Composition of data monitoring committee (DMC); summary of its role and reporting structure; statement of whether it is independent from the sponsor and competing interests; and reference to where further details about its charter can be found, if not in the protocol. Alternatively, an explanation of why a DMC is not needed | _____ NA _____ |
| 18 |                                 |     |                                                                                                                                                                                                                                                                                                                                       |                |
| 19 |                                 |     |                                                                                                                                                                                                                                                                                                                                       |                |
| 20 |                                 |     |                                                                                                                                                                                                                                                                                                                                       |                |
| 21 |                                 |     |                                                                                                                                                                                                                                                                                                                                       |                |
| 22 |                                 | 21b | Description of any interim analyses and stopping guidelines, including who will have access to these interim results and make the final decision to terminate the trial                                                                                                                                                               | _____ NA _____ |
| 23 |                                 |     |                                                                                                                                                                                                                                                                                                                                       |                |
| 24 |                                 |     |                                                                                                                                                                                                                                                                                                                                       |                |
| 25 | Harms                           | 22  | Plans for collecting, assessing, reporting, and managing solicited and spontaneously reported adverse events and other unintended effects of trial interventions or trial conduct                                                                                                                                                     | _____ NA _____ |
| 26 |                                 |     |                                                                                                                                                                                                                                                                                                                                       |                |
| 27 |                                 |     |                                                                                                                                                                                                                                                                                                                                       |                |
| 28 | Auditing                        | 23  | Frequency and procedures for auditing trial conduct, if any, and whether the process will be independent from investigators and the sponsor                                                                                                                                                                                           | _____ NA _____ |
| 29 |                                 |     |                                                                                                                                                                                                                                                                                                                                       |                |
| 30 |                                 |     |                                                                                                                                                                                                                                                                                                                                       |                |
| 31 |                                 |     |                                                                                                                                                                                                                                                                                                                                       |                |
| 32 | <b>Ethics and dissemination</b> |     |                                                                                                                                                                                                                                                                                                                                       |                |
| 33 |                                 |     |                                                                                                                                                                                                                                                                                                                                       |                |
| 34 | Research ethics approval        | 24  | Plans for seeking research ethics committee/institutional review board (REC/IRB) approval                                                                                                                                                                                                                                             | _____ 14 _____ |
| 35 |                                 |     |                                                                                                                                                                                                                                                                                                                                       |                |
| 36 |                                 |     |                                                                                                                                                                                                                                                                                                                                       |                |
| 37 | Protocol amendments             | 25  | Plans for communicating important protocol modifications (eg, changes to eligibility criteria, outcomes, analyses) to relevant parties (eg, investigators, REC/IRBs, trial participants, trial registries, journals, regulators)                                                                                                      | _____ 14 _____ |
| 38 |                                 |     |                                                                                                                                                                                                                                                                                                                                       |                |
| 39 |                                 |     |                                                                                                                                                                                                                                                                                                                                       |                |
| 40 |                                 |     |                                                                                                                                                                                                                                                                                                                                       |                |
| 41 |                                 |     |                                                                                                                                                                                                                                                                                                                                       |                |
| 42 |                                 |     |                                                                                                                                                                                                                                                                                                                                       |                |
| 43 |                                 |     |                                                                                                                                                                                                                                                                                                                                       |                |
| 44 |                                 |     |                                                                                                                                                                                                                                                                                                                                       |                |
| 45 |                                 |     |                                                                                                                                                                                                                                                                                                                                       |                |
| 46 |                                 |     |                                                                                                                                                                                                                                                                                                                                       |                |
| 47 |                                 |     |                                                                                                                                                                                                                                                                                                                                       |                |

|    |                               |     |                                                                                                                                                                                                                                                                                     |                        |
|----|-------------------------------|-----|-------------------------------------------------------------------------------------------------------------------------------------------------------------------------------------------------------------------------------------------------------------------------------------|------------------------|
| 1  |                               |     |                                                                                                                                                                                                                                                                                     |                        |
| 2  |                               |     |                                                                                                                                                                                                                                                                                     |                        |
| 3  | Consent or assent             | 26a | Who will obtain informed consent or assent from potential trial participants or authorised surrogates, and how (see Item 32)                                                                                                                                                        | _____7_____            |
| 4  |                               |     |                                                                                                                                                                                                                                                                                     |                        |
| 5  |                               |     |                                                                                                                                                                                                                                                                                     |                        |
| 6  |                               | 26b | Additional consent provisions for collection and use of participant data and biological specimens in ancillary studies, if applicable                                                                                                                                               | _____NA_____           |
| 7  |                               |     |                                                                                                                                                                                                                                                                                     |                        |
| 8  | Confidentiality               | 27  | How personal information about potential and enrolled participants will be collected, shared, and maintained in order to protect confidentiality before, during, and after the trial                                                                                                | _____14_____           |
| 9  |                               |     |                                                                                                                                                                                                                                                                                     |                        |
| 10 |                               |     |                                                                                                                                                                                                                                                                                     |                        |
| 11 | Declaration of interests      | 28  | Financial and other competing interests for principal investigators for the overall trial and each study site                                                                                                                                                                       | _____15_____           |
| 12 |                               |     |                                                                                                                                                                                                                                                                                     |                        |
| 13 |                               |     |                                                                                                                                                                                                                                                                                     |                        |
| 14 | Access to data                | 29  | Statement of who will have access to the final trial dataset, and disclosure of contractual agreements that limit such access for investigators                                                                                                                                     | _____14_____           |
| 15 |                               |     |                                                                                                                                                                                                                                                                                     |                        |
| 16 |                               |     |                                                                                                                                                                                                                                                                                     |                        |
| 17 | Ancillary and post-trial care | 30  | Provisions, if any, for ancillary and post-trial care, and for compensation to those who suffer harm from trial participation                                                                                                                                                       | _____NA_____           |
| 18 |                               |     |                                                                                                                                                                                                                                                                                     |                        |
| 19 |                               |     |                                                                                                                                                                                                                                                                                     |                        |
| 20 | Dissemination policy          | 31a | Plans for investigators and sponsor to communicate trial results to participants, healthcare professionals, the public, and other relevant groups (eg, via publication, reporting in results databases, or other data sharing arrangements), including any publication restrictions | _____14_____           |
| 21 |                               |     |                                                                                                                                                                                                                                                                                     |                        |
| 22 |                               |     |                                                                                                                                                                                                                                                                                     |                        |
| 23 |                               |     |                                                                                                                                                                                                                                                                                     |                        |
| 24 |                               |     |                                                                                                                                                                                                                                                                                     |                        |
| 25 |                               | 31b | Authorship eligibility guidelines and any intended use of professional writers                                                                                                                                                                                                      | _____NA_____           |
| 26 |                               |     |                                                                                                                                                                                                                                                                                     |                        |
| 27 |                               | 31c | Plans, if any, for granting public access to the full protocol, participant-level dataset, and statistical code                                                                                                                                                                     | _____14_____           |
| 28 |                               |     |                                                                                                                                                                                                                                                                                     |                        |
| 29 | <b>Appendices</b>             |     |                                                                                                                                                                                                                                                                                     |                        |
| 30 |                               |     |                                                                                                                                                                                                                                                                                     |                        |
| 31 | Informed consent materials    | 32  | Model consent form and other related documentation given to participants and authorised surrogates                                                                                                                                                                                  | Supplementary material |
| 32 |                               |     |                                                                                                                                                                                                                                                                                     |                        |
| 33 |                               |     |                                                                                                                                                                                                                                                                                     |                        |
| 34 | Biological specimens          | 33  | Plans for collection, laboratory evaluation, and storage of biological specimens for genetic or molecular analysis in the current trial and for future use in ancillary studies, if applicable                                                                                      | _____N/A_____          |
| 35 |                               |     |                                                                                                                                                                                                                                                                                     |                        |
| 36 |                               |     |                                                                                                                                                                                                                                                                                     |                        |

37 \*It is strongly recommended that this checklist be read in conjunction with the SPIRIT 2013 Explanation & Elaboration for important clarification on the items.  
 38 Amendments to the protocol should be tracked and dated. The SPIRIT checklist is copyrighted by the SPIRIT Group under the Creative Commons  
 39 "[Attribution-NonCommercial-NoDerivs 3.0 Unported](https://creativecommons.org/licenses/by-nc-nd/3.0/)" license.  
 40
